# Supplementary material
Source: publisher figshare collection journal article supplement (https://acs.figshare.com/ndownloader/files/6502077)
Supplement: Supplementary file 1 [file 6502077]

## Supporting Information

### Photorelease of Incarcerated Caged Acids from Hydrophobic Coumaryl Esters into Aqueous Solution

Nareshbabu Kamatham,<sup>1</sup> Débora C. Mendes,<sup>2</sup> José P. Da Silva,<sup>2</sup> Richard S. Givens,<sup>3\*</sup> and V. Ramamurthy<sup>1\*</sup>

<sup>1</sup> Department of Chemistry, University of Miami, Coral Gables, Miami, FL 33124, USA

<sup>2</sup> Meditbio, FCT, Universidade do Algarve, Campus de Gambelas, 8005-139 Faro, Portugal

<sup>3</sup> Department of Chemistry, University of Kansas, Lawrence, KS 66045, USA

|                                                                                                                                             |    |
|---------------------------------------------------------------------------------------------------------------------------------------------|----|
| 1. Structures of host, caged esters and primary photolysis products                                                                         | 2  |
| 2. Synthesis and spectral data of caged esters                                                                                              | 3  |
| 2.1. Materials                                                                                                                              | 3  |
| 2.2. Synthesis of coumaryl phototriggers <b>1 – 7</b> and photoproduct <b>8</b>                                                             | 3  |
| 2.3. <sup>1</sup> H NMR and mass spectral data of synthesized 1-8                                                                           | 4  |
| 2.4 <sup>1</sup> H NMR, <sup>13</sup> C NMR, ESI-MS spectra of phototriggers                                                                | 6  |
| 3. Preparation and spectral characterization of host-guest complexes                                                                        | 22 |
| 3.1 Preparation of host-guest complexes of octa acid with phototriggers                                                                     | 22 |
| 3.2 UV-Visible absorbance and fluorescence spectra of <b>1-8</b>                                                                            | 23 |
| 3.3 <sup>1</sup> HNMR titration spectra of octa acid with guests <b>1-8</b> , and DOSY and COSY 2D-NMR spectra of the host-guest complexes. | 29 |
| 4. Photolysis studies                                                                                                                       | 47 |
| 4.1 Sample preparation and procedures                                                                                                       | 47 |
| 4.2 Fluorescence spectra of irradiated samples                                                                                              | 49 |
| 4.3 <sup>1</sup> H NMR spectra of irradiated samples                                                                                        | 52 |
| 4.4 ESI-MS and LC- MS of irradiated samples                                                                                                 | 60 |
| 5. References                                                                                                                               | 61 |

## 1. Structures of host, caged esters and primary photolysis products

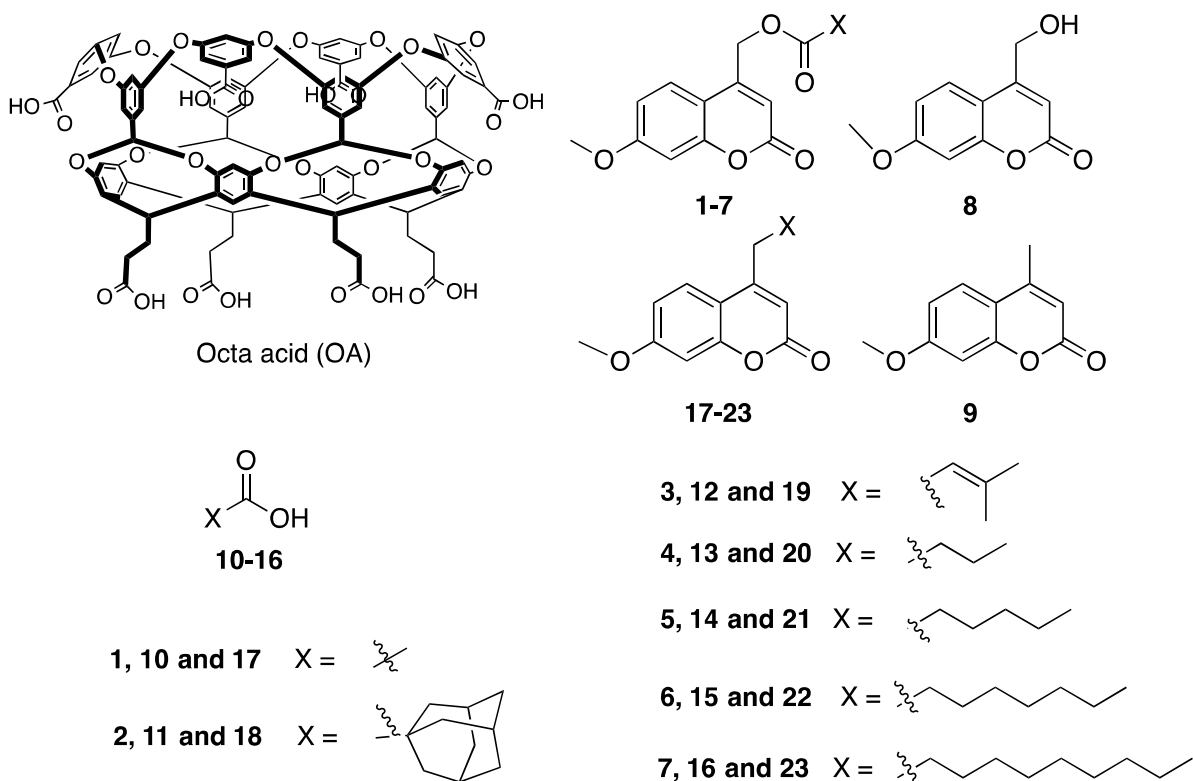

**Scheme S1.** Structures of water-soluble octa acid (OA) cavitand, 7-methoxy-4-methylcoumaryl esters **1 – 7** and photoproducts **8-16**.

## 2. Synthesis and spectral data of caged esters

### 2.1 Materials

4-Bromomethyl-7-methoxycoumarin, 7-methoxy-4-methylcoumarin, acetic acid, 1-adamantanecarboxylic acid, 3,3-dimethylacrylic acid, butanoic acid, hexanoic acid, octanoic acid, and decanoic acid (Sigma-Aldrich/Alfa Aesar) were used as received. The host, octa acid (OA), was synthesized by following the literature procedure<sup>1</sup>.

## 2.2 Synthesis of Coumaryl phototriggers 1 – 7 and photoproduct 8

### (a) Synthesis of Coumaryl phototriggers 1 – 7

Each phototrigger was prepared by adding 0.4 mmol of 4-bromomethyl-7-methoxycoumarin and 0.5 mmol of the correspondent carboxylic acid to 15 mL of a 2:1 mixture of benzene:DMF in a 50 mL round bottomed flask. The mixture was stirred under N<sub>2</sub> until the solution became transparent. Then, 0.55 mmol of 1,8-diazabicyclo[5.4.0]undec-7-ene (DBU) was added and the solution stirred for 12 h. The reaction mixture was poured into water, extracted with CHCl<sub>3</sub> (25 mL) and washed twice with aqueous NaHCO<sub>3</sub> solution (5%, 2x10 mL). The organic layer was dried over Na<sub>2</sub>SO<sub>4</sub>, concentrated and eluted through a silica gel column using CHCl<sub>3</sub> as the mobile phase to isolate the pure product as a light yellow solid. Phototriggers **1** – **7** were characterized by <sup>1</sup>H NMR, <sup>13</sup>C NMR and electrospray ionization mass spectrometry (ESI-MS). Photoproducts were isolated as yellow solid with the yields listed below. **1** : light yellow solid, 42 mg, 42 %; **2** : light yellow solid, 55 mg, 37 %; **3** : light yellow solid, 63 mg, 54 %; **4** : light yellow solid, 58 mg, 52 %; **5** : light yellow solid, 62 mg, 50 %; **6** : light yellow solid, 87 mg, 65 %; **7** : light yellow solid, 99 mg, 68 %

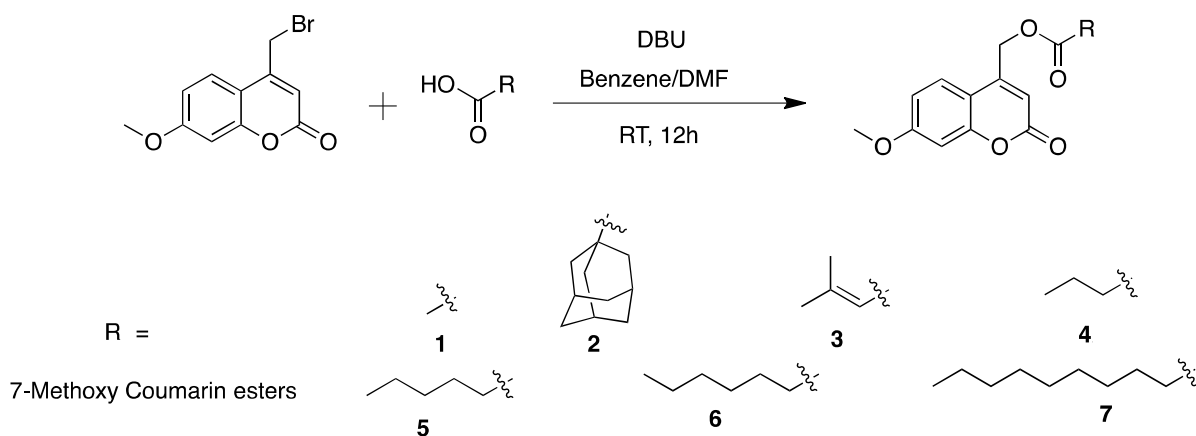

**Scheme S2.** Synthesis of 7-methoxy-4-methylcoumaryl esters **1** – **7**.

### 2.3 <sup>1</sup>H NMR and mass spectral data of synthesized 1-8

NMR and ESI-Mass spectra of Caged Esters: <sup>1</sup>H NMR (500 MHz) and <sup>13</sup>C-NMR (125 MHz) studies were carried out on a Bruker NMR spectrometer at 25 °C. Full scan ESI-MS spectra were obtained using a Bruker Daltonics microOTOF-QII. The synthesized compounds were solubilized in a mixture methanol-chloroform (50:50) containing 0.1 % formic acid. The ions were continuously generated by infusing the solutions (200 µL hr<sup>-1</sup>) into the source, with the help of a syringe pump (KdScientific, model 601553, USA). Typical experimental conditions were as follows: capillary voltage, 4.5 kV; drying gas, 180 °C at 4 L min<sup>-1</sup>; nebulizer gas pressure, 0.3 bar; end plate offset -500 V. The Fragmentation ESI-

MS/MS spectra were obtained using Bruker Daltonics HCT *ultra* under positive and negative polarity. The ions were continuously generated by infusing the standards in acetonitrile (50  $\mu$ M) or the irradiated samples prepared in aqueous ammonia, at 4 mL min<sup>-1</sup> into the mass spectrometer source, with the help of a syringe pump (KdScientific, model 781100, USA). Typical experimental conditions were as follows: capillary voltage, 3.5 kV; capillary exit voltage (CE), 75 V; skimmer voltage, 40 V; drying gas, 300 °C at 6 L min<sup>-1</sup>; nebulizer gas pressure, 20 psi.

**1:** <sup>1</sup>H-NMR (500 MHz, DMSO)  $\delta$ : 2.17 (s, 3H), 3.86 (s, 3H), 5.33 (d,  $J$  = 1Hz, 2H), 6.27 (s, 1H), 6.97 (dd,  $J$  = 6.5 and 2Hz, 1H), 7.04 (d,  $J$  = 2.0 Hz, 1H), 7.66 (d,  $J$  = 9.0 Hz, 1H); <sup>13</sup>C-NMR (125 MHz, DMSO)  $\delta$ : 27.9, 36.5, 38.8, 40.8, 55.5, 65.4, 114.0, 127.3, 130.1, 163.9, 177.2, 191.0; ESI-HRMS: Calculated for C<sub>13</sub>H<sub>12</sub>O<sub>5</sub>Na [M+Na]<sup>+</sup> 271.0577, observed: 271.0573.

**2:** <sup>1</sup>H-NMR (500 MHz, DMSO)  $\delta$ : 1.69 (m, 6H), 1.89 (m, 6H), 1.99 (m, 3 H), 3.86 (s, 3H), 5.33 (s, 2H), 6.17 (s, 1H), 6.98 (dd,  $J$  = 6.5 and 2.5 Hz, 1H), 7.04 (d,  $J$  = 2.5 Hz, 1H), 7.64 (d,  $J$  = 9.0 Hz, 1H); <sup>13</sup>C-NMR (125 MHz, DMSO-d<sub>6</sub>)  $\delta$ : 27.72, 36.28, 38.79, 56.45, 61.54, 101.49, 109.24, 110.72, 112.86, 126.30, 151.22, 155.48, 160.37, 163.06, 176.23, 191.0; ESI-HRMS: Calculated for C<sub>22</sub>H<sub>24</sub>O<sub>5</sub>Na [M+Na]<sup>+</sup> 391.1516, observed: 391.1500.

**3:** <sup>1</sup>H-NMR (500 MHz, DMSO)  $\delta$ : 1.92 (s, 3H), 2.14 (s, 3H), 3.85 (s, 3H), 5.35 (s, 2H), 5.87 (s, 1H), 6.20 (s, 1H), 6.98 (dd,  $J$  = 6.5 and 2Hz, 1H), 7.04 (d,  $J$  = 2.5 Hz, 1H), 7.66 (d,  $J$  = 8.5 Hz, 1H); <sup>13</sup>C-NMR (125 MHz, DMSO)  $\delta$ : 20.5, 27.4, 56.4, 60.9, 101.4, 109.3, 110.7, 112.8, 114.9, 126.2, 151.3, 155.4, 159.8, 160.4, 163.01, 185.37; ESI-HRMS: Calculated for C<sub>16</sub>H<sub>16</sub>O<sub>5</sub> Na [M+Na]<sup>+</sup> 311.0890, observed: 311.0896

**4:** <sup>1</sup>H-NMR (500 MHz, DMSO)  $\delta$ : 0.91 (t,  $J$  = 7 Hz, 3H), 1.60 (m, 2H), 2.46 (t,  $J$  = 7 Hz, 2H), 3.87 (s, 3H), 5.36 (s, 2H), 6.25 (s, 1H), 6.98 (dd,  $J$  = 6 and 3Hz, 1H), 7.04 (d,  $J$  = 2.5 Hz, 1H), 7.67 (d,  $J$  = 8.5 Hz, 1H); <sup>13</sup>C-NMR (125 MHz, DMSO)  $\delta$ : 13.87, 18.33, 35.53, 56.45, 61.49, 101.48, 109.45, 110.75, 112.82, 126.29, 151.04, 155.45, 160.40, 163.03, 172.79. ESI-HRMS: Calculated for C<sub>15</sub>H<sub>16</sub>O<sub>5</sub>Na [M+Na]<sup>+</sup> 299.0890, observed: 299.0876.

**5:** <sup>1</sup>H-NMR (500 MHz, DMSO)  $\delta$ : 0.86 (t,  $J$  = 7 Hz, 3H), 1.23-1.28 (m, 2H), 1.29-1.33 (m, 2H), 2.47 (t,  $J$  = 7.5 Hz, 2H), 3.87 (s, 3H), 5.35 (s, 2H), 6.25 (s, 1H), 6.98 (dd,  $J$  = 6 and 2.5 Hz, 1H), 7.04 (d,  $J$  = 2.5 Hz, 1H), 7.67 (d,  $J$  = 8.5 Hz, 1H); <sup>13</sup>C-NMR (125 MHz, DMSO)  $\delta$ : 14.35, 22.32, 24.52, 31.08, 33.64, 56.45, 61.51, 101.48, 109.50, 110.76, 112.81, 126.31,

151.03, 155.48, 160.39, 163.03, 172.92. ESI-HRMS: Calculated for  $C_{17}H_{20}O_5Na$   $[M+Na]^+$  327.1203, observed: 327.1218.

**6:**  $^1H$ -NMR (500 MHz, DMSO)  $\delta$ : 0.85 (t,  $J = 6.5$  Hz, 3H), 1.23-1.26 (m, 8H), 1.55-1.58 (m, 2H), 2.47 (t,  $J = 7.5$  Hz, 2H), 3.86 (s, 3H), 5.35 (s, 2H), 6.25 (s, 1H), 6.97 (dd,  $J = 6$  and 2.5 Hz, 1H), 7.04 (d,  $J = 2.5$  Hz, 1H), 7.66 (d,  $J = 9.0$  Hz, 1H);  $^{13}C$ -NMR (125 MHz, DMSO)  $\delta$ : 14.37, 22.46, 24.84, 28.78, 28.83, 31.57, 33.68, 56.45, 61.52, 61.52, 101.47, 109.56, 110.76, 112.81, 126.32, 151.01, 155.47, 160.39, 163.03, 172.92. ESI-HRMS: Calculated for  $C_{19}H_{24}O_5Na$   $[M+Na]^+$  355.1516, observed: 355.1529.

**7:**  $^1H$ -NMR (500 MHz, DMSO)  $\delta$ : 0.85 (t,  $J = 6.5$  Hz, 3H), 1.25-1.23 (m, 12H), 1.55-1.58 (m, 2H), 2.47 (t,  $J = 7.5$  Hz, 2H), 3.86 (s, 3H), 5.33 (s, 2H), 6.25 (s, 1H), 6.97 (dd,  $J = 6$  and 2.5 Hz, 1H), 7.04 (d,  $J = 2.5$  Hz, 1H), 7.66 (d,  $J = 9.0$  Hz, 1H);  $^{13}C$ -NMR (125 MHz, DMSO)  $\delta$ : 14.39, 22.54, 24.83, 28.87, 29.08, 29.12, 29.30, 31.72, 33.69, 56.43, 61.51, 101.46, 109.56, 110.75, 112.79, 126.30, 150.99, 155.47, 160.38, 163.02, 172.91. ESI-HRMS: Calculated for  $C_{21}H_{28}O_5Na$   $[M+Na]^+$  383.1829, observed: 383.1841.

## 2.4 $^1\text{H}$ NMR, $^{13}\text{C}$ NMR , ESI-MS spectra of phototriggers

(a)  $^1\text{H}$  and  $^{13}\text{C}$  NMR Spectra, Mass spectra and fragmentation spectra of esters 1 – 7 and photoproduct 8.

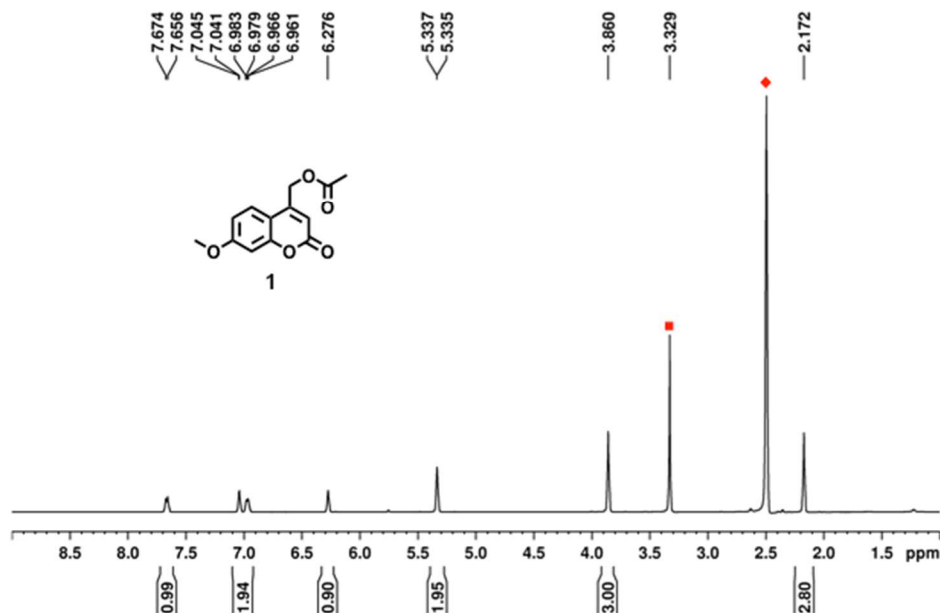

**Figure S1.**  $^1\text{H}$ -NMR (500 MHz) spectrum of 1 in  $\text{DMSO}-d_6$ . ♦ and ■ indicate the residual solvent peaks of  $\text{DMSO}-d_6$  and water, respectively.

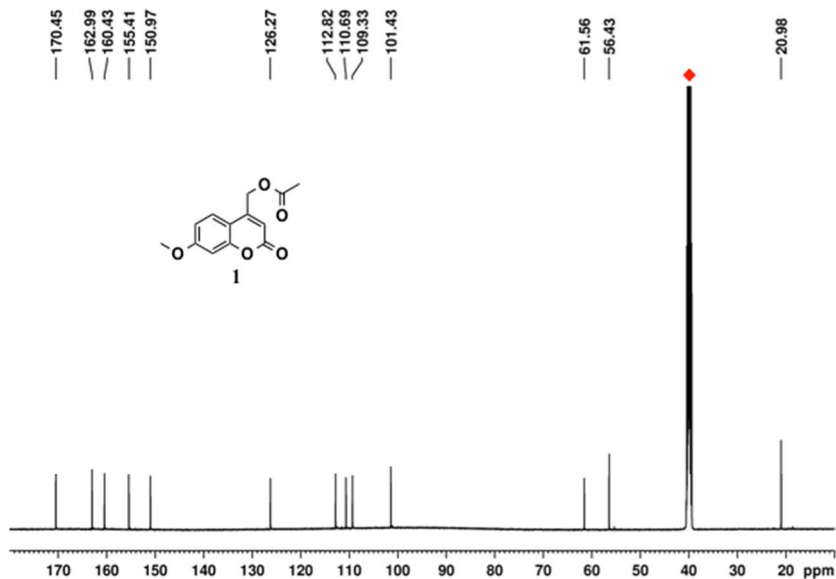

**Figure S2.**  $^{13}\text{C}$ -NMR (125 MHz) spectrum of 1 in  $\text{DMSO}-d_6$ . ♦ indicates the residual solvent peak of  $\text{DMSO}-d_6$ .

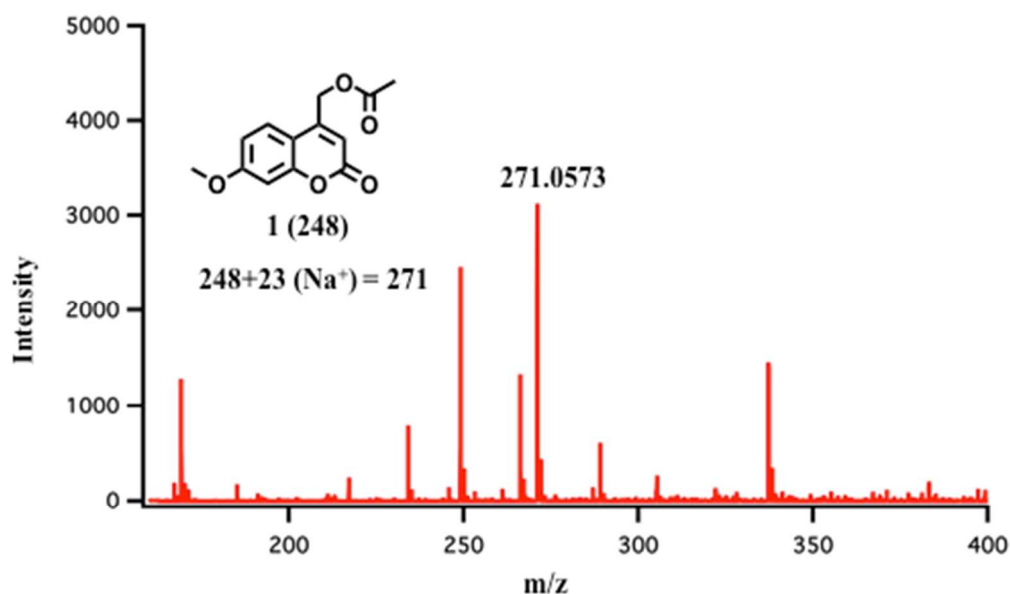

**Figure S3.** ESI mass spectrum of **1** in methanol-chloroform (50:50) containing 0.1 % formic acid.

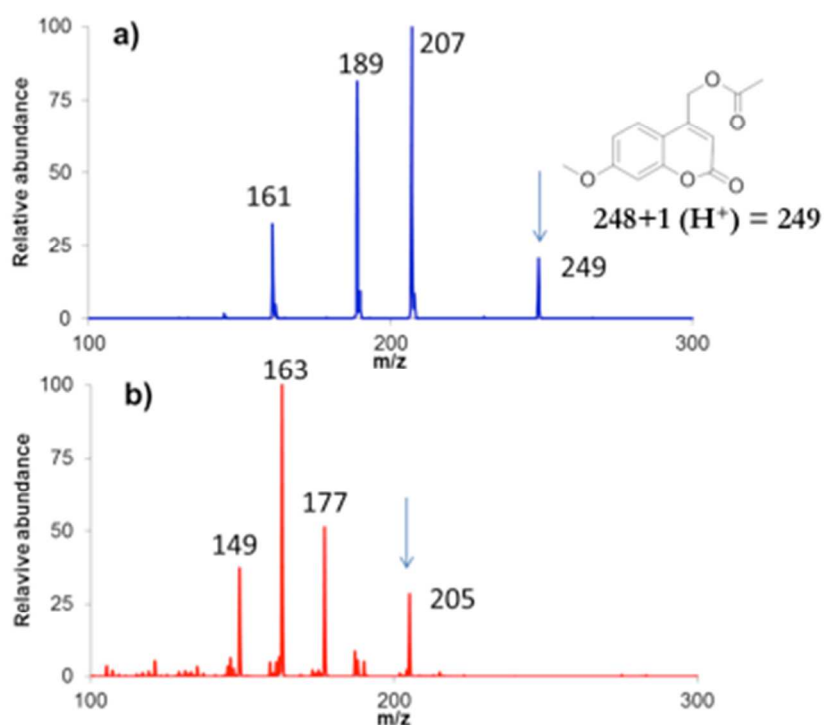

**Figure S4.** Fragmentation spectra of **1** ( $m/z$  249), **a)**, and of  $m/z$  205, **b)**. Spectrum **b)** was assigned to the decarboxylation photoproduct from the radical pair generated by initial homolysis of the  $\text{CH}_2\text{-O}$  bond of ester **1**. The arrows indicate the fragmented peaks.

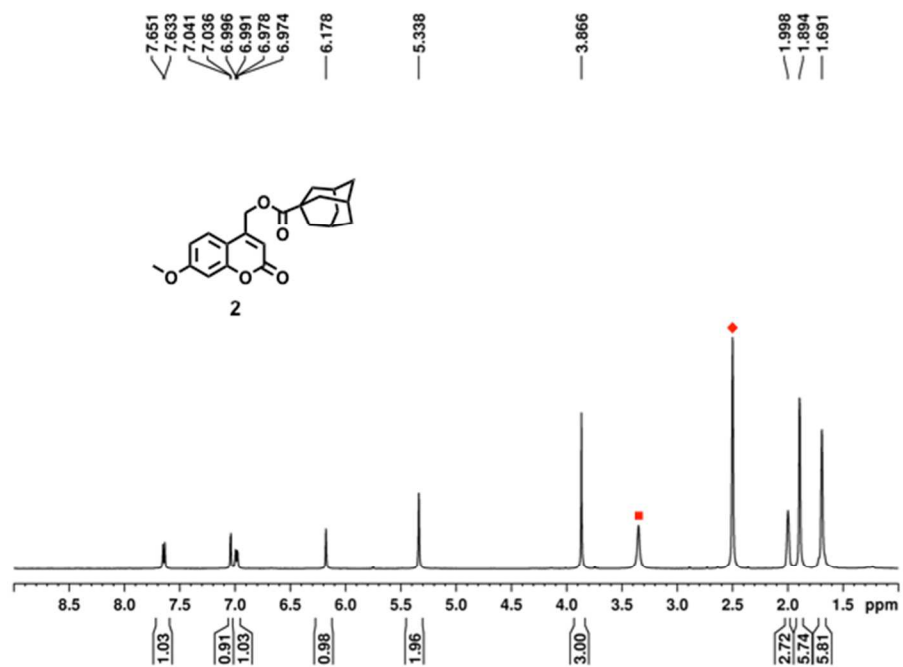

**Figure S5.** <sup>1</sup>H-NMR (500 MHz) spectrum of **2** in DMSO-*d*<sub>6</sub>. ♦ and ■ indicate the residual solvent peaks of DMSO-*d*<sub>6</sub> and water, respectively.

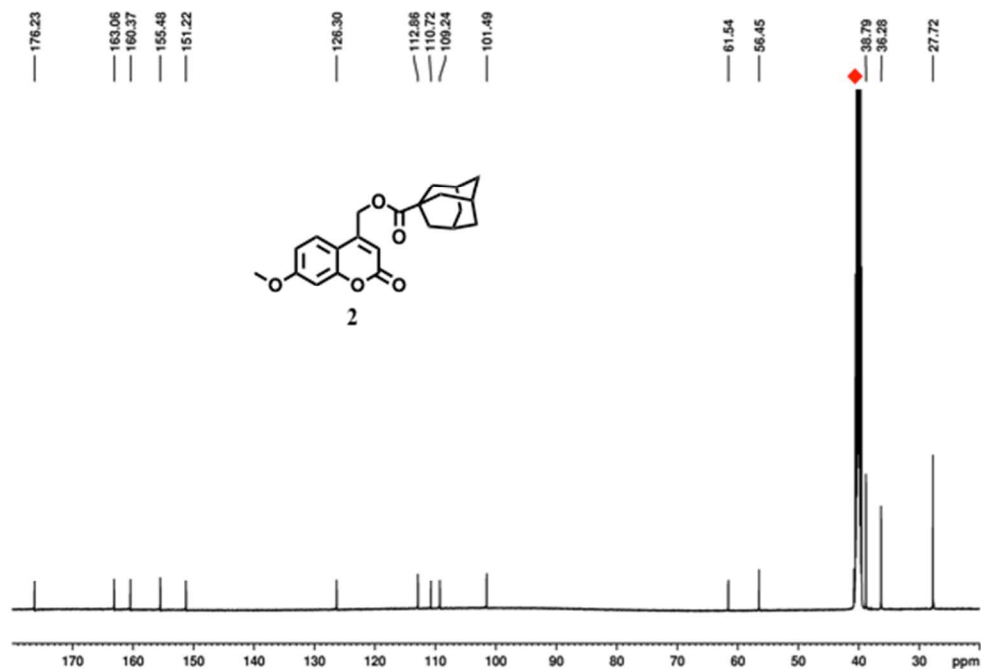

**Figure S6.** <sup>13</sup>C-NMR (125 MHz) spectrum of **2** in DMSO-*d*<sub>6</sub>. ♦ indicates the residual solvent peak of DMSO-*d*<sub>6</sub>.



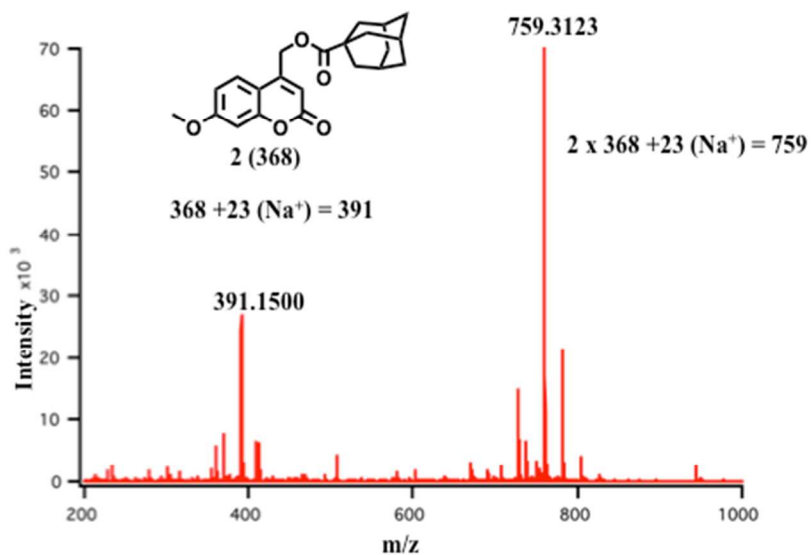

**Figure S7.** ESI mass spectrum of **2** in methanol-chloroform (50:50) containing 0.1 % formic acid.

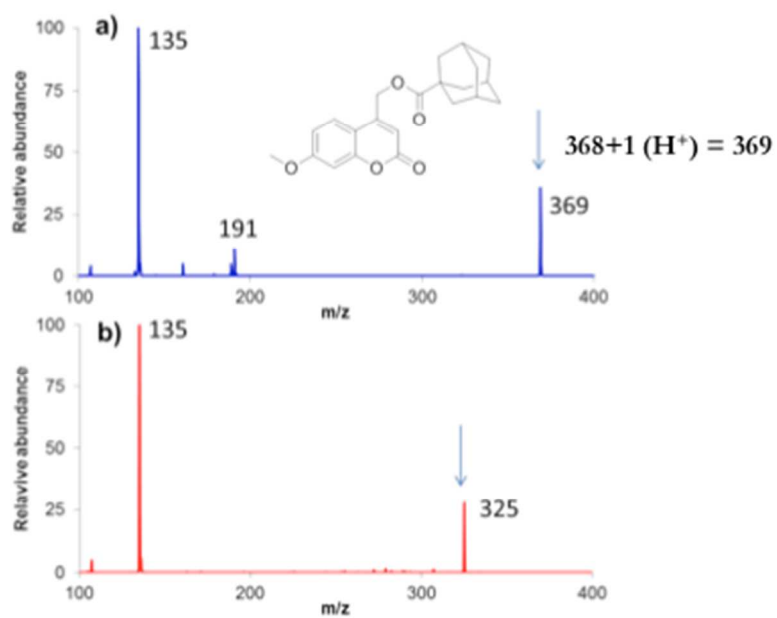

**Figure S8.** Fragmentation spectra of **2** ( $m/z$  369), **a)**, and of  $m/z$  325, **b)**. Spectrum **b)** was assigned to the decarboxylation photoproduct from the radical pair generated by initial homolysis of the  $\text{CH}_2\text{-O}$  bond of **2**. The arrows indicate the fragmented peaks.

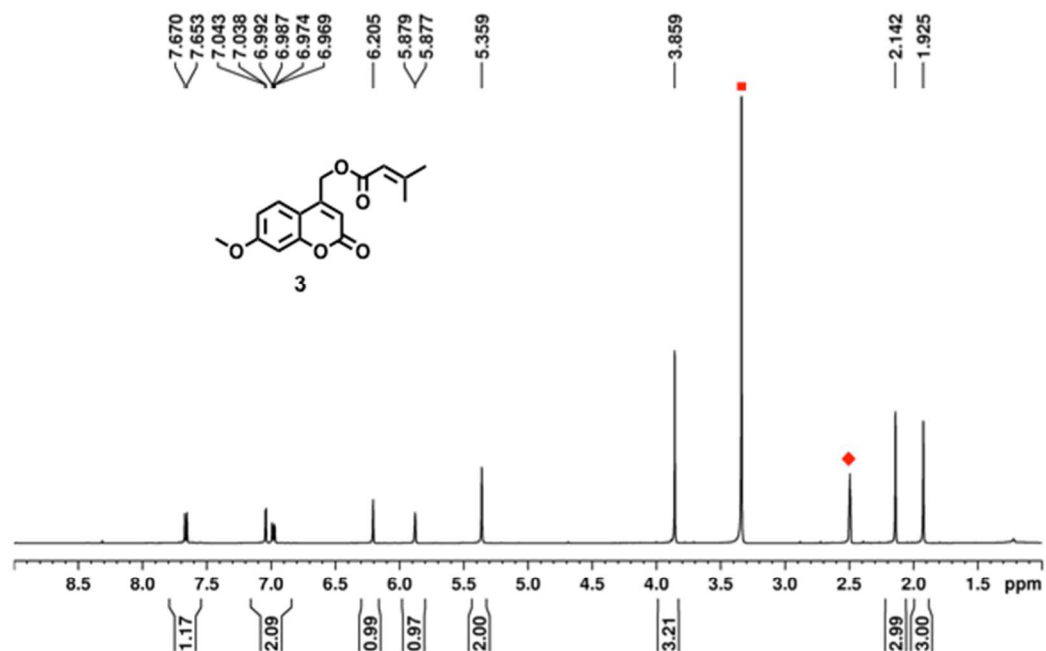

**Figure S9.** <sup>1</sup>H-NMR (500 MHz) spectrum of **3** in DMSO-*d*<sub>6</sub>. ♦ and ■ indicate the residual solvent peaks of DMSO-*d*<sub>6</sub> and water, respectively.

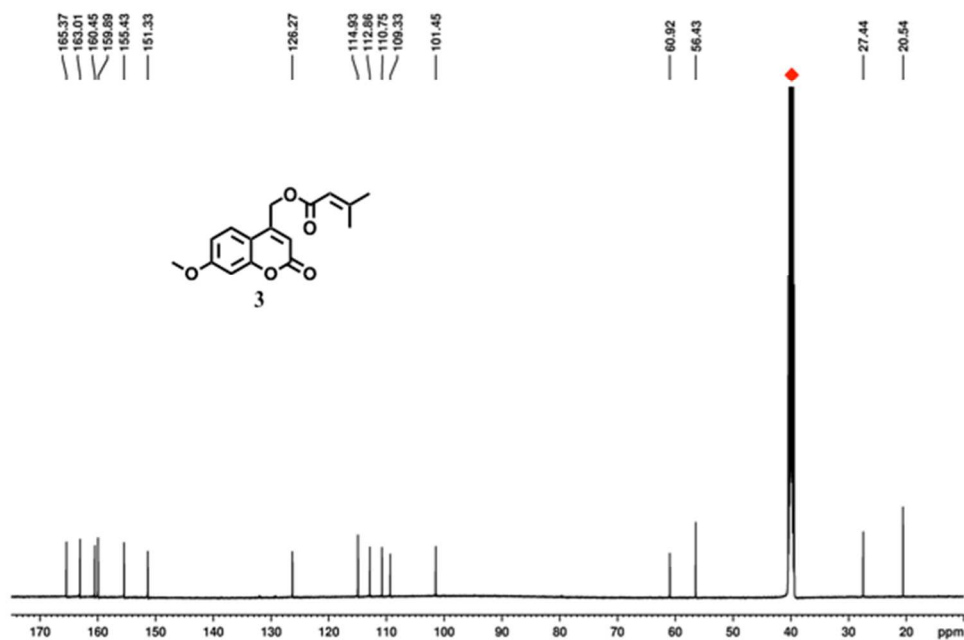

**Figure S10.** <sup>13</sup>C-NMR (125 MHz) spectra of **3** in DMSO-*d*<sub>6</sub>. ♦ indicates the residual solvent peak of DMSO-*d*<sub>6</sub>.

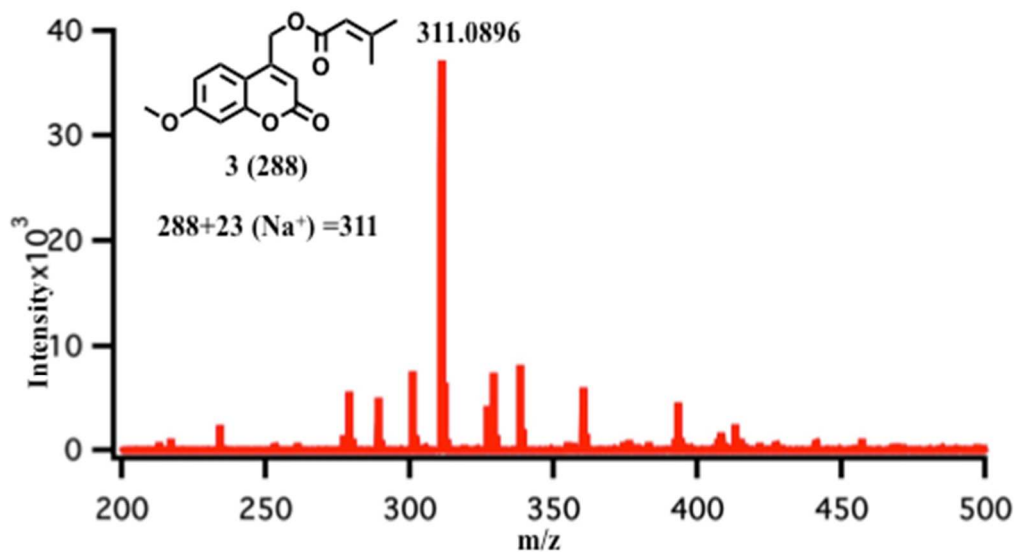

**Figure S11.** ESI mass spectrum of **3** in methanol-chloroform (50:50) containing 0.1 % formic acid.

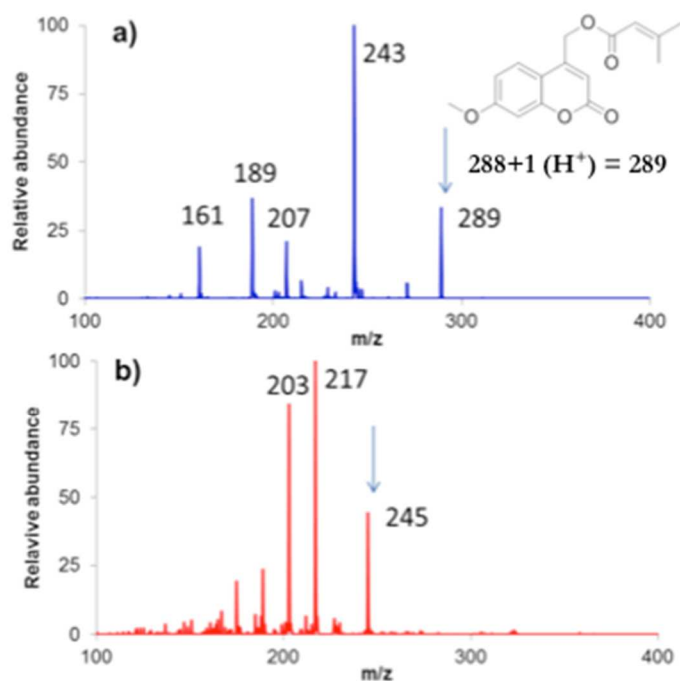

**Figure S12.** Fragmentation spectra of **3** ( $m/z$  289, **a**), and of  $m/z$  245, **b**). Spectrum **b**) was assigned the decarboxylation photoproduct from the radical pair generated by initial homolysis of the  $\text{CH}_2\text{-O}$  bond of **3**. The arrows indicate the fragmented peaks.

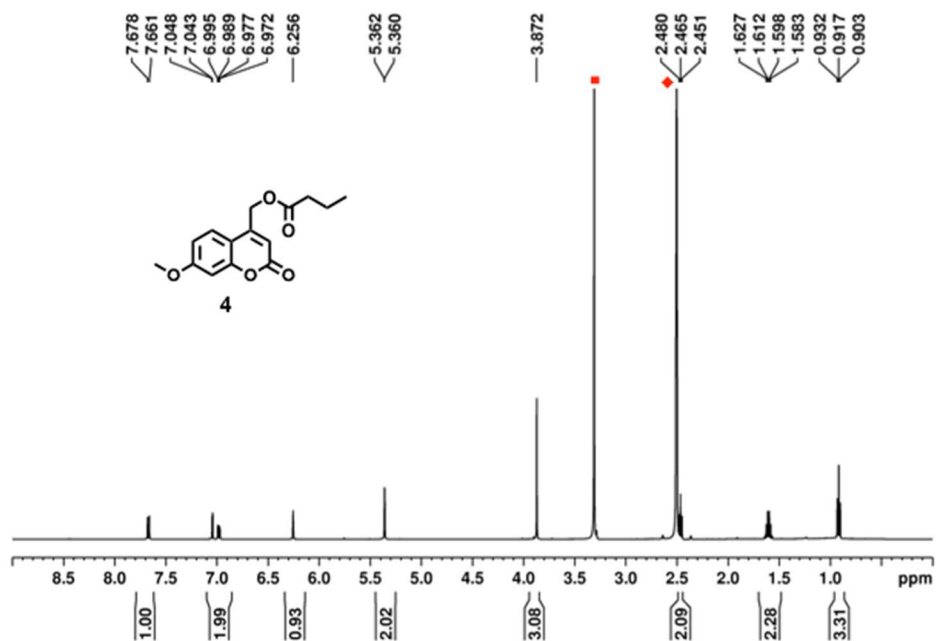

**Figure S13.** <sup>1</sup>H-NMR (500 MHz) spectrum of **4** in DMSO-*d*<sub>6</sub>. ♦ and ■ indicate the residual solvent peaks of DMSO-*d*<sub>6</sub> and water, respectively.

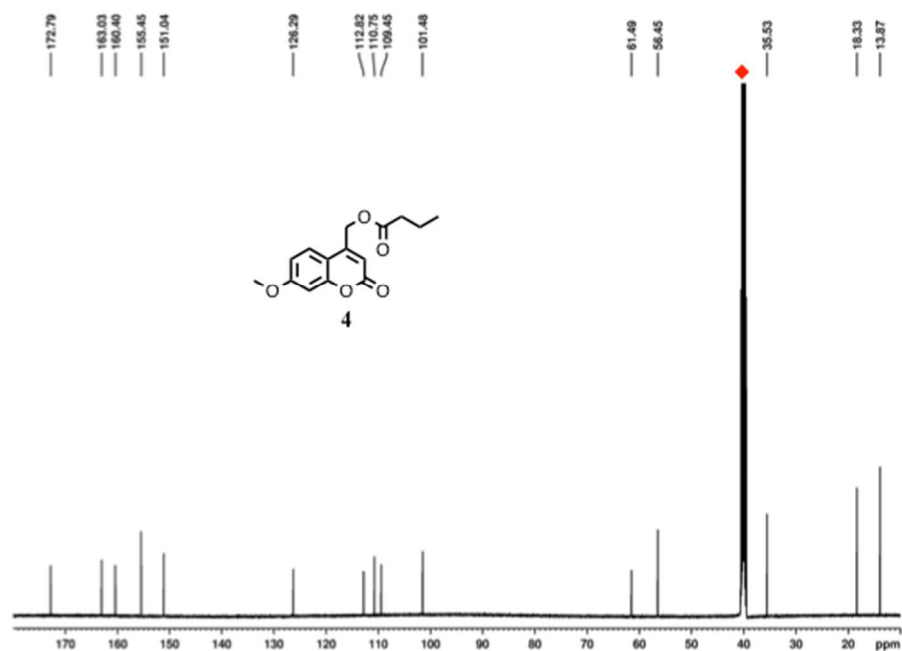

**Figure S14.** <sup>13</sup>C-NMR (125 MHz) spectrum of **4** in DMSO-*d*<sub>6</sub>. ♦ indicates the residual solvent peak of DMSO-*d*<sub>6</sub>.

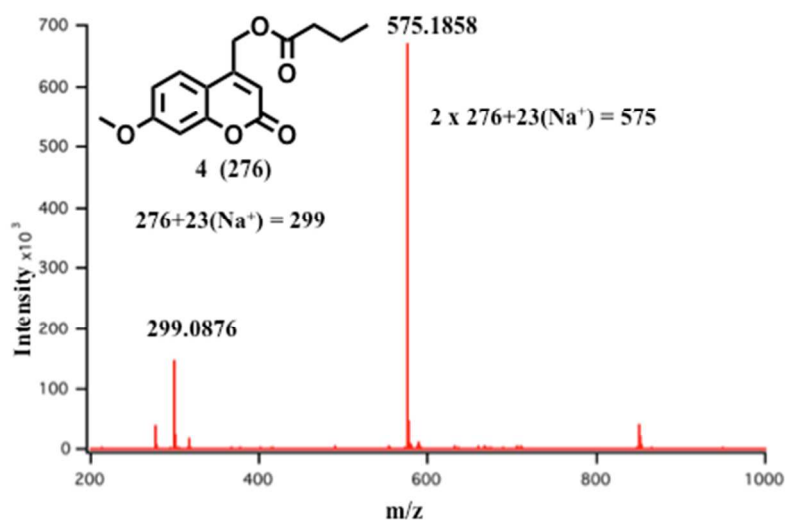

**Figure S15.** ESI mass spectrum of **4** in methanol-chloroform (50:50) containing 0.1 % formic acid.

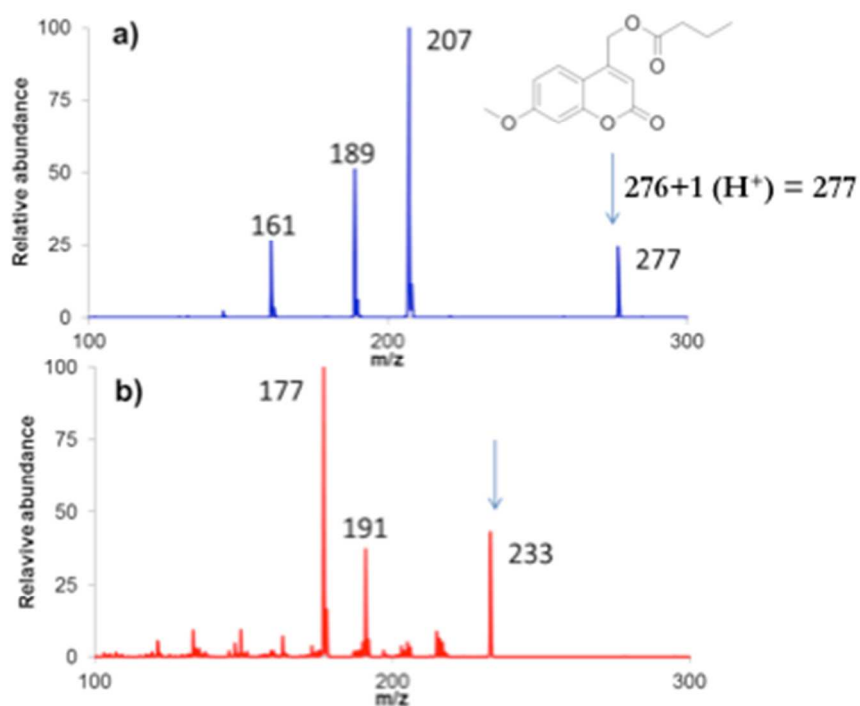

**Figure S16.** Fragmentation spectra of **4** (m/z 277), **a**), and of m/z 233, **b**). Spectrum **b**) was assigned to the decarboxylation photoproduct from the radical pair generated by initial homolysis of the CH<sub>2</sub>-O bond of **4**. The arrows indicate the fragmented peaks.

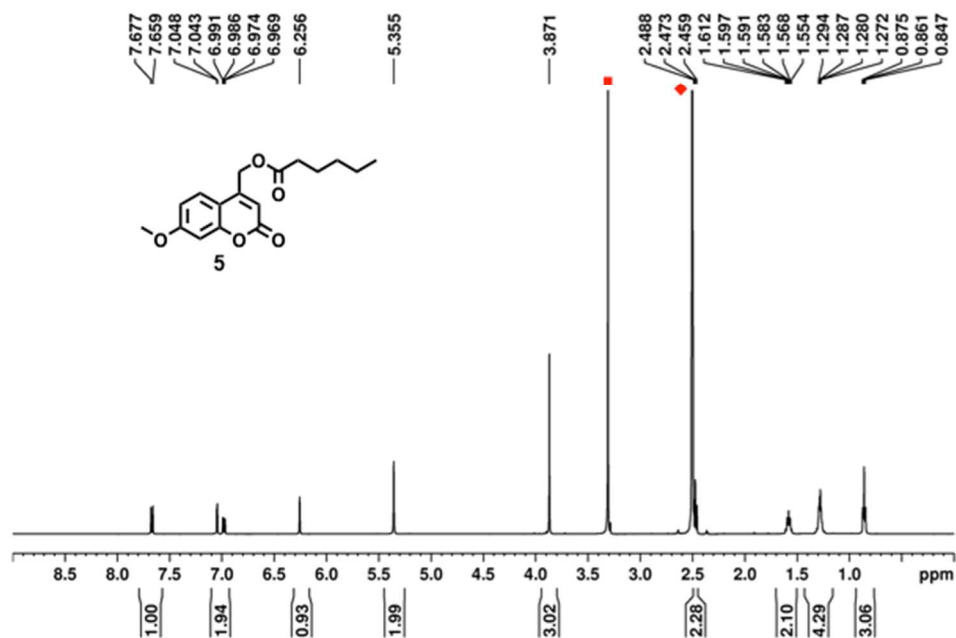

**Figure S17.** <sup>1</sup>H-NMR (500 MHz) spectrum of **5** in DMSO-*d*<sub>6</sub>. ♦ and ■ indicate the residual solvent peaks of DMSO-*d*<sub>6</sub> and water, respectively.

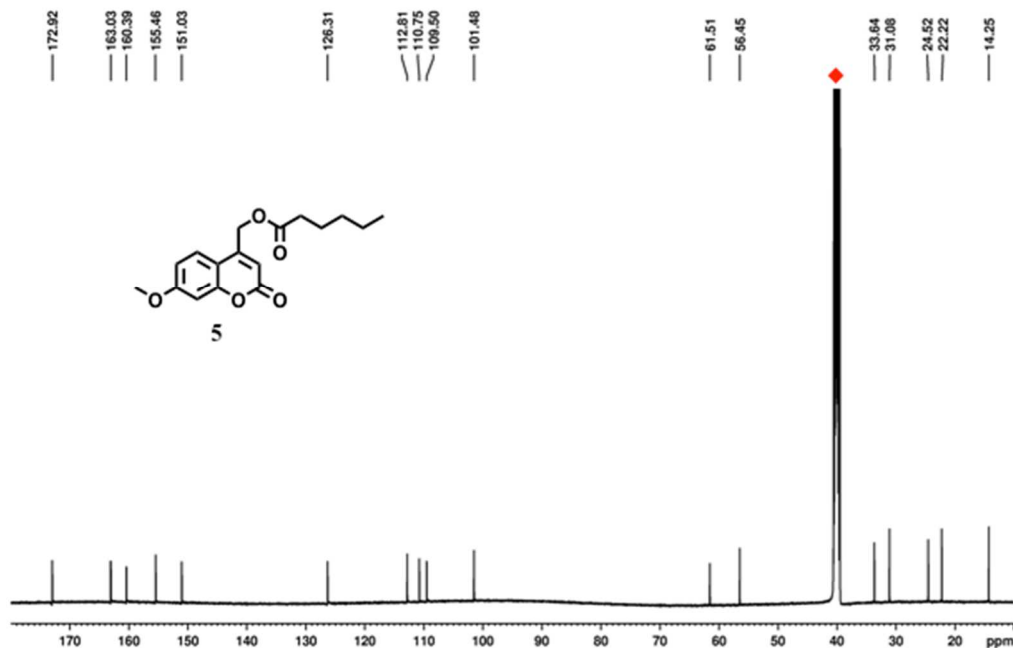

**Figure S18.** <sup>13</sup>C-NMR (125 MHz) spectrum of **5** in DMSO-*d*<sub>6</sub>. ♦ indicates the residual solvent peak of DMSO-*d*<sub>6</sub>.

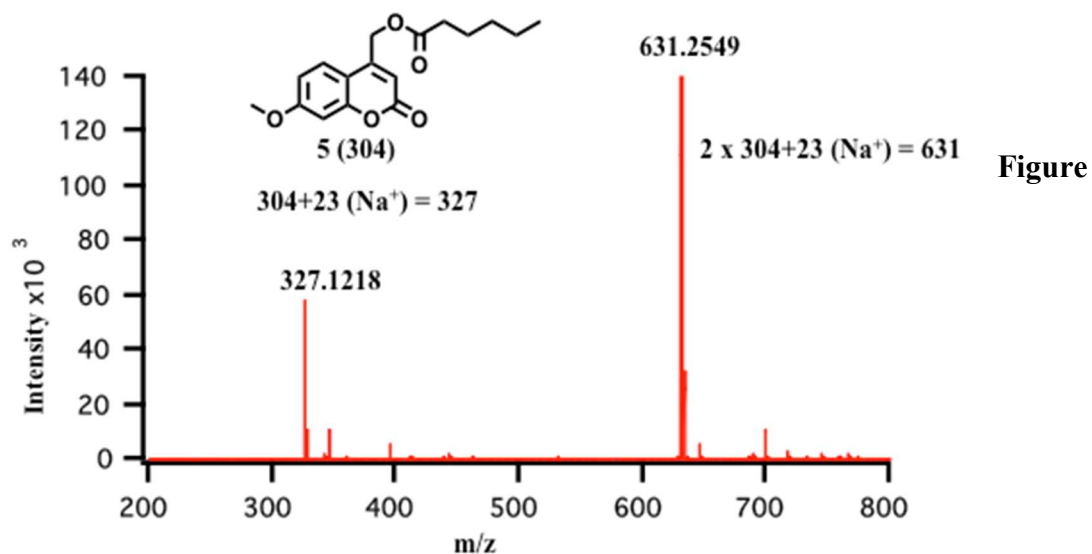

**S19.** ESI mass spectrum of **5** in methanol-chloroform (50:50) containing 0.1 % formic acid.

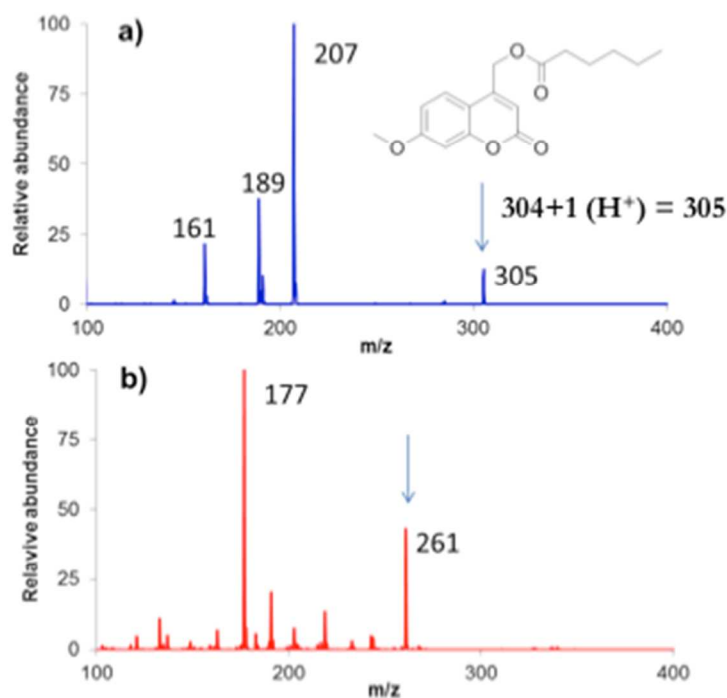

**Figure S20.** Fragmentation spectra of **5** ( $m/z$  305, **a**), and of  $m/z$  261, **b**). Spectrum **b**) was assigned to the decarboxylation photoproduct from the radical pair generated by initial homolysis of the  $\text{CH}_2\text{-O}$  bond of **5**. The arrows indicate the fragmented peaks.

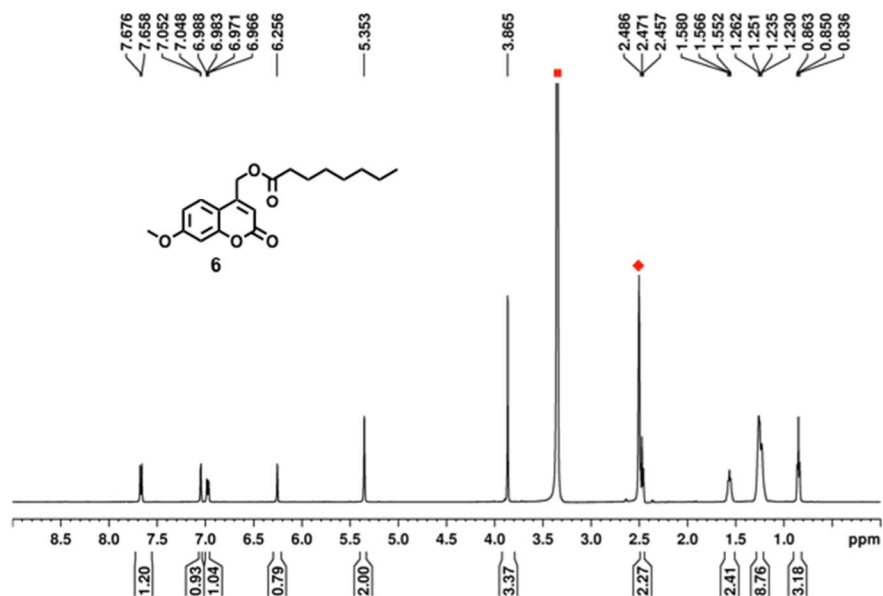

**Figure S21.** <sup>1</sup>H-NMR (500 MHz) spectrum of **6** in DMSO-*d*<sub>6</sub>. ♦ and ■ indicate the residual solvent peak of DMSO-*d*<sub>6</sub> and water, respectively.

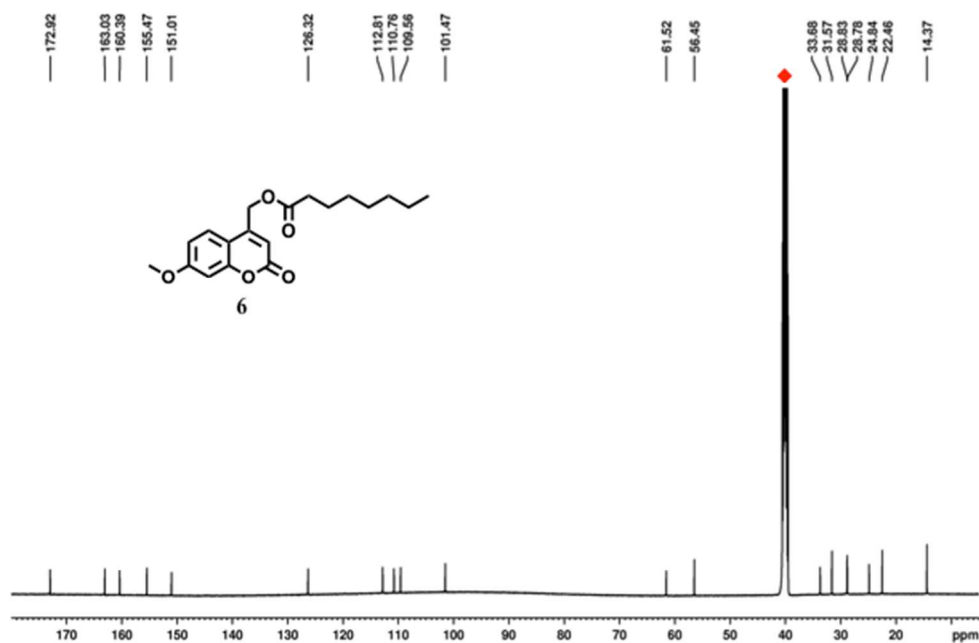

**Figure S22.** <sup>13</sup>C-NMR (125 MHz) spectra of **6** in DMSO-*d*<sub>6</sub>. ♦ indicates the residual solvent peak of DMSO-*d*<sub>6</sub>.



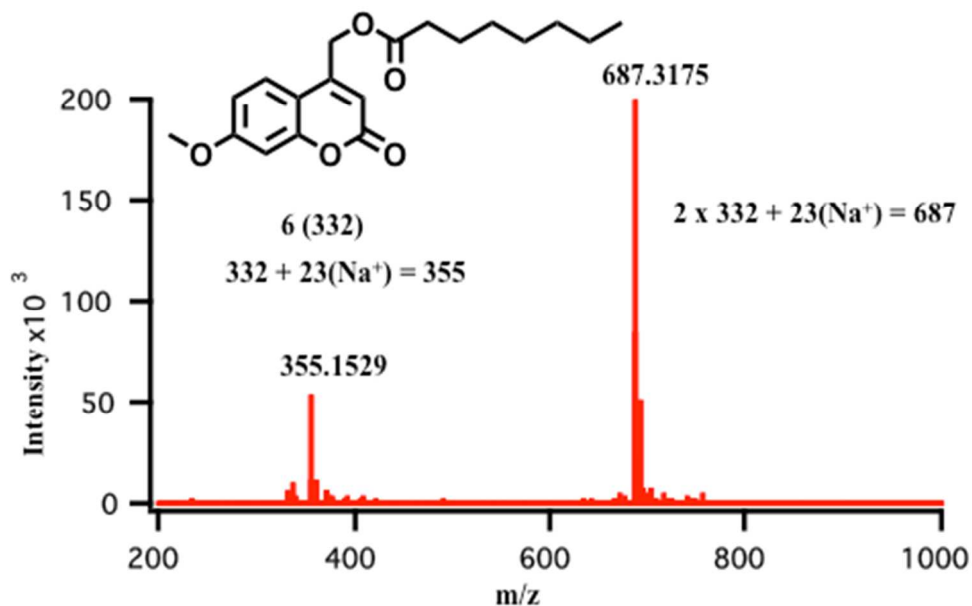

**Figure S23.** ESI mass spectrum of **6** in methanol-chloroform (50:50) containing 0.1 % formic acid.

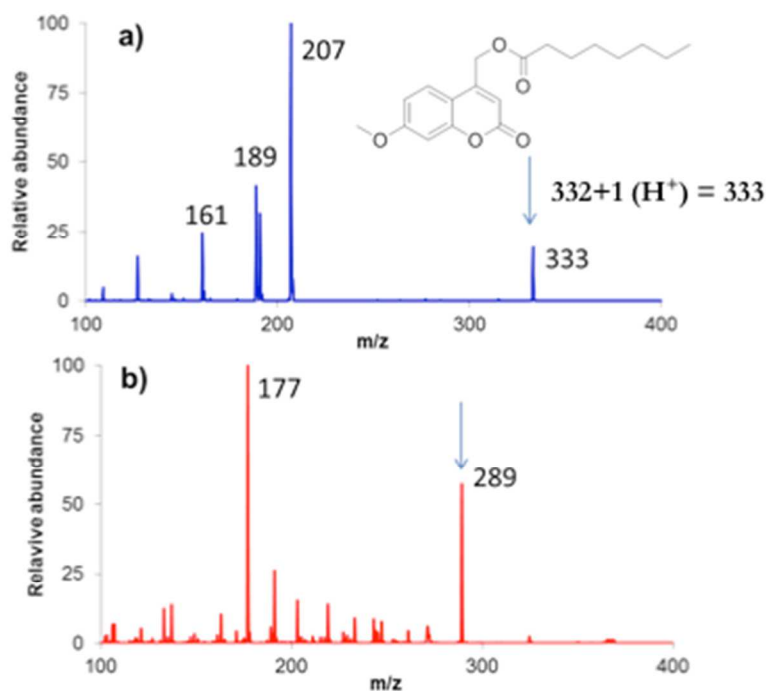

**Figure S24.** Fragmentation spectra of **6** ( $m/z$  333), **a**), and of  $m/z$  289, **b**). Spectrum **b**) was assigned to the decarboxylation photoproduct from the radical pair generated by initial homolysis of the  $\text{CH}_2\text{-O}$  bond of **6**. The arrows indicate the fragmented peaks.

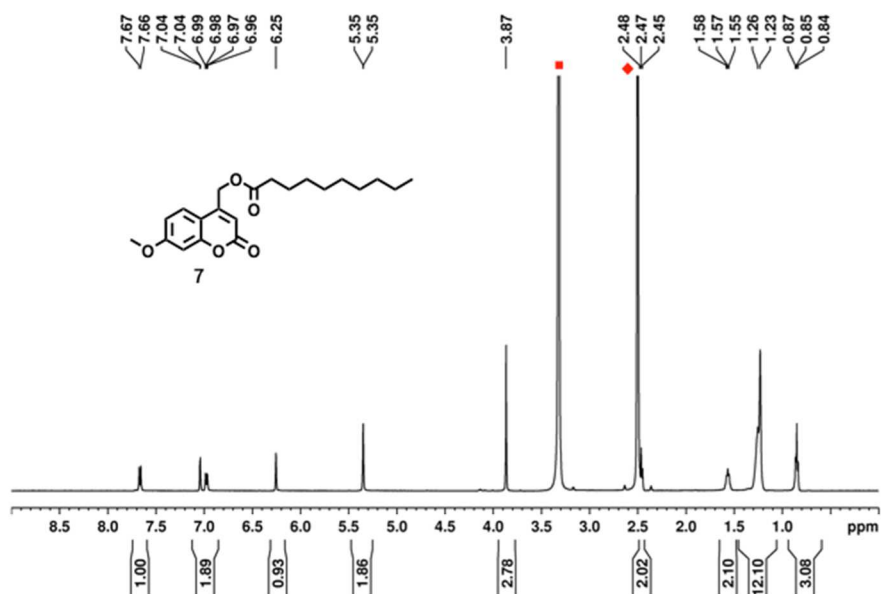

**Figure S25.** <sup>1</sup>H-NMR (500 MHz) spectrum of **7** in DMSO-*d*<sub>6</sub>. ♦ and ■ indicate the residual solvent peaks of DMSO-*d*<sub>6</sub> and water, respectively.

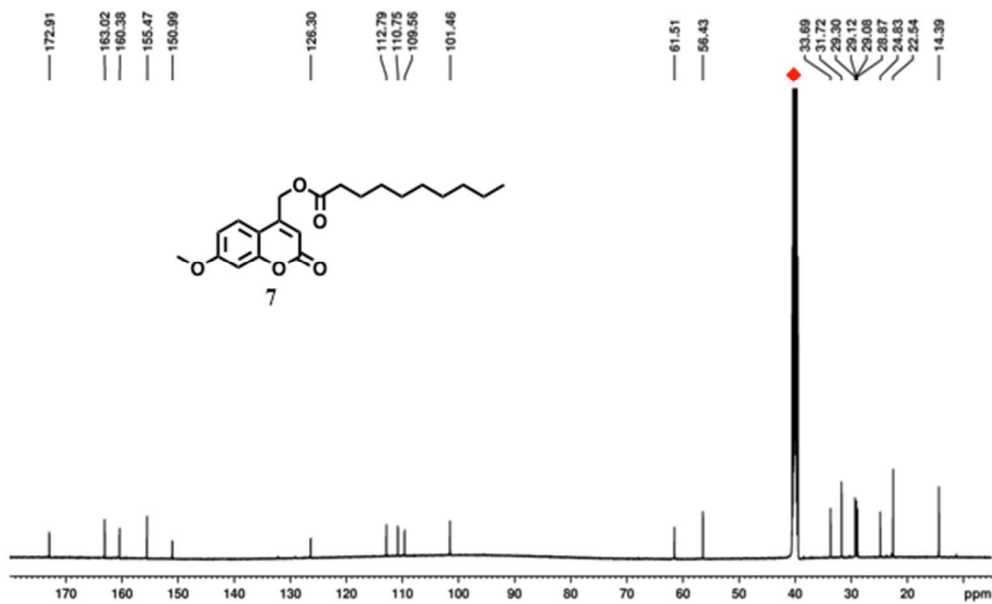

**Figure S26.** <sup>13</sup>C-NMR (125 MHz) spectra of **7** in DMSO-*d*<sub>6</sub>. ♦ indicates the residual solvent peak of DMSO-*d*<sub>6</sub>.

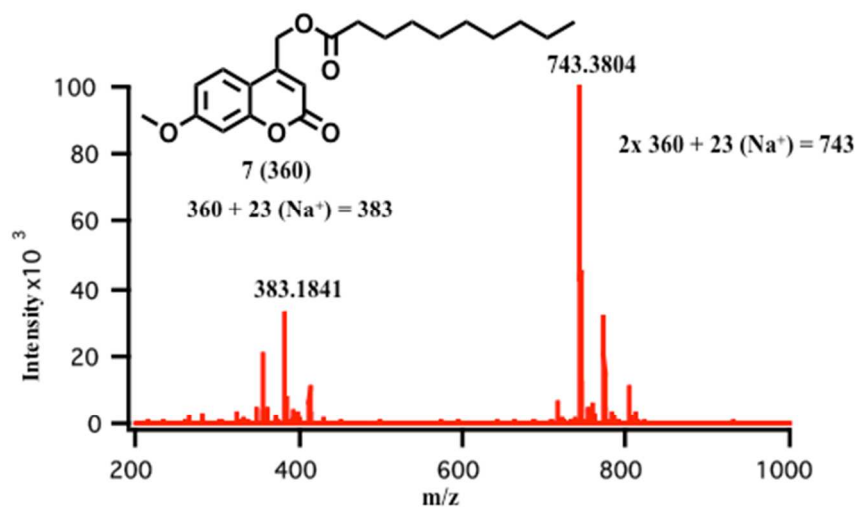

**Figure S27.** ESI mass spectrum of **7** in methanol-chloroform (50:50) containing 0.1 % formic acid.

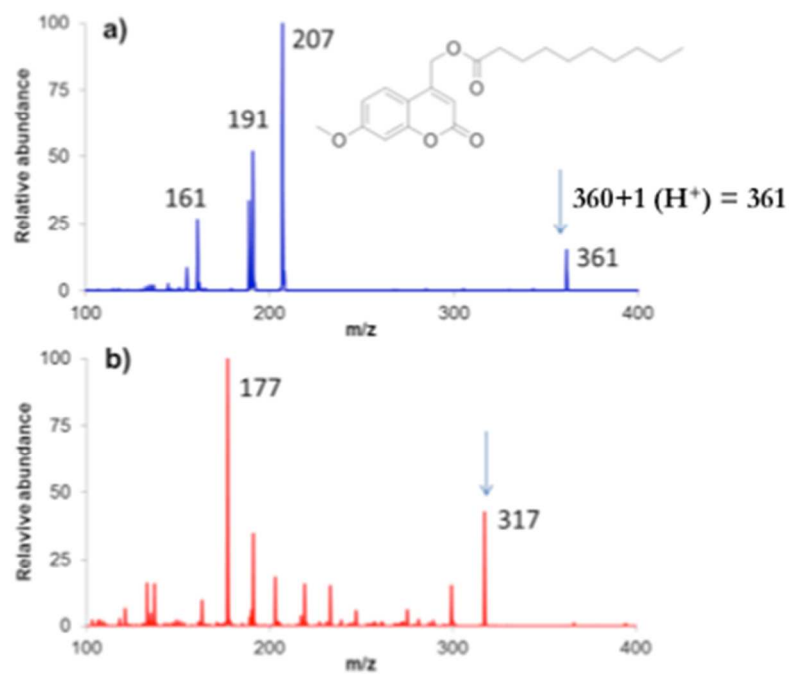

**Figure S28.** Fragmentation spectra of **7** ( $m/z$  361), **a**), and of  $m/z$  317, **b**). Spectrum **b**) was assigned to the decarboxylation photoproduct from the radical pair generated by initial homolysis of the  $\text{CH}_2\text{-O}$  bond of **7**. The arrows indicate the fragmented peaks.

### (b) Synthesis of Photoproduct 8

7-methoxy-4-(hydroxymethyl)-2H-chromen-2-one was synthesized by following the literature procedure<sup>2</sup>. A mixture of 300 mg (1.11 mmol) of 4-bromomethyl-7-methoxy coumarin, and 900 mg (10.9 mmol) of sodium acetate in 8 mL of acetic anhydride was refluxed for 4 h. After filtration and washing of the residue with 5 mL of boiling acetic anhydride, the resulting filtrate was poured into ice-water after being cooled. The resulting white precipitate of 4-(acetoxymethyl)-7-methoxycoumarin was then refluxed in 15 mL of a 1:1 mixture of ethanol and hydrochloric acid for 2 h. After reaction the mixture was cooled to room temperature and filtered, yielding 70 mg of 7-methoxy-4-(hydroxymethyl)-2H-chromen-2-one as a white solid (yield: 30%). The product was characterized by <sup>1</sup>H NMR, <sup>13</sup>C NMR and ESI-MS. The product was obtained in 30% yield (70 mg).

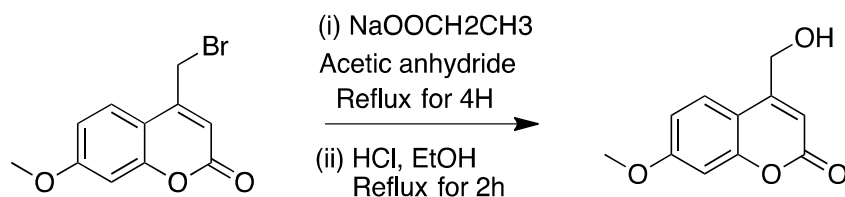

**Scheme S3.** Synthesis of 7-methoxy-4-(hydroxymethyl)-2H-chromen-2-one (**8**).

**8:** <sup>1</sup>H-NMR (500 MHz, DMSO)  $\delta$ : 4.73 (s, 3H), 5.60 (s, 1H), 6.30 (s, 1H), 6.94 (dd,  $J$  = 6.5 and 2.0 Hz, 1H), 7.0 (d,  $J$  = 2.5 Hz, 1H), 7.62 (d,  $J$  = 8.5 Hz, 1H); <sup>13</sup>C-NMR (125 MHz, DMSO)  $\delta$ : 56.36, 59.55, 101.28, 107.86, 111.12, 112.60, 125.85, 155.28, 157.20, 160.95, 162.69. ESI-HRMS: Calculated for C<sub>11</sub>H<sub>10</sub>O<sub>4</sub>Na [M+Na]<sup>+</sup> 229.0471, observed: 229.0489.

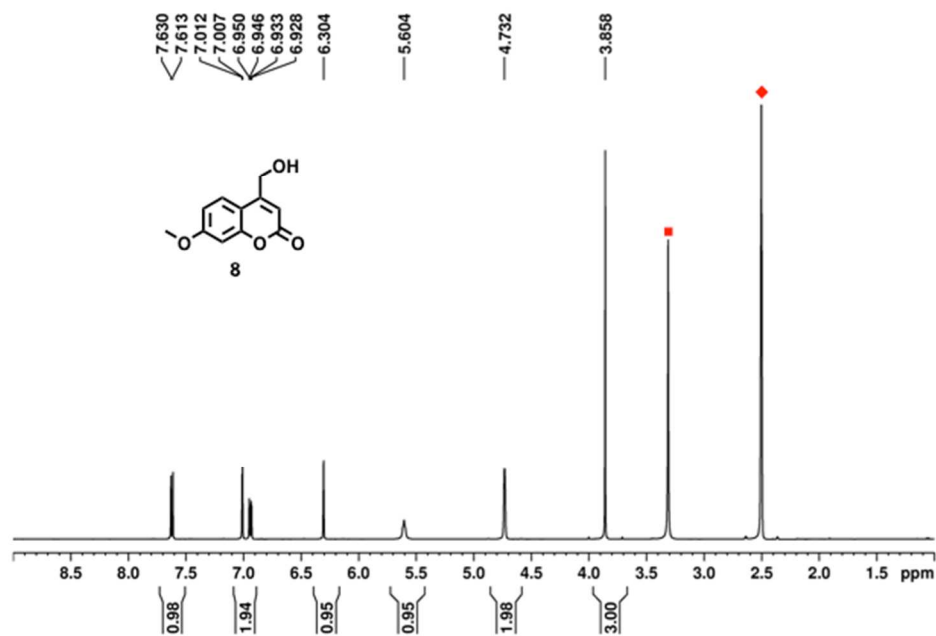

**Figure S29.** <sup>1</sup>H-NMR (500 MHz) spectrum of photoproduct **8** in DMSO-*d*<sub>6</sub>. ♦ and ■ indicate the residual solvent peaks of DMSO-*d*<sub>6</sub> and water, respectively.

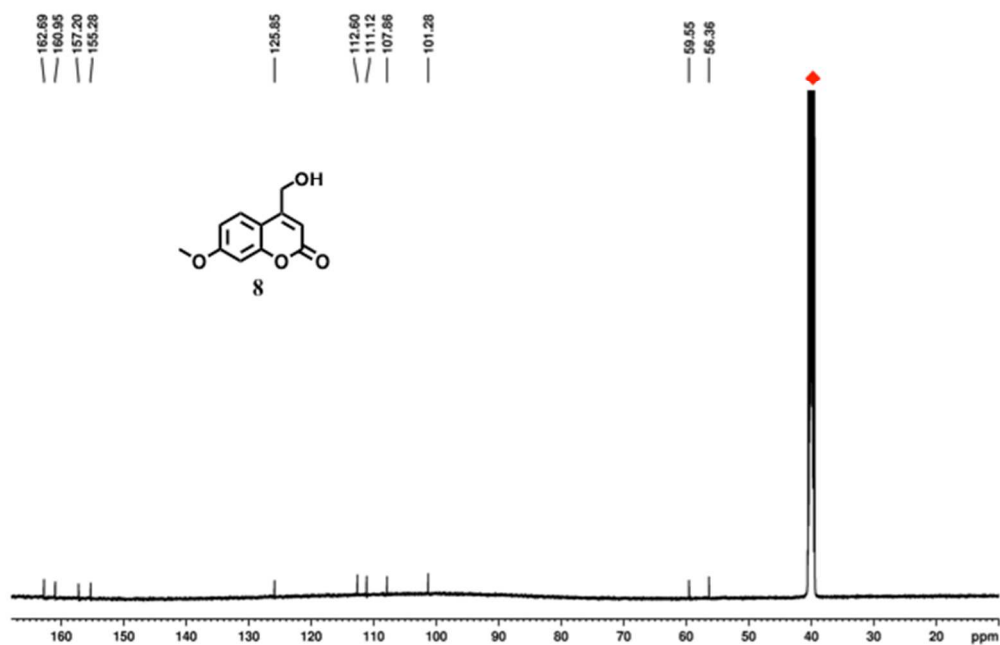

**Figure S30.** <sup>13</sup>C-NMR (125 MHz) spectra of photoproduct **8** in DMSO-*d*<sub>6</sub>. ♦ indicates the residual solvent peak of DMSO-*d*<sub>6</sub>.

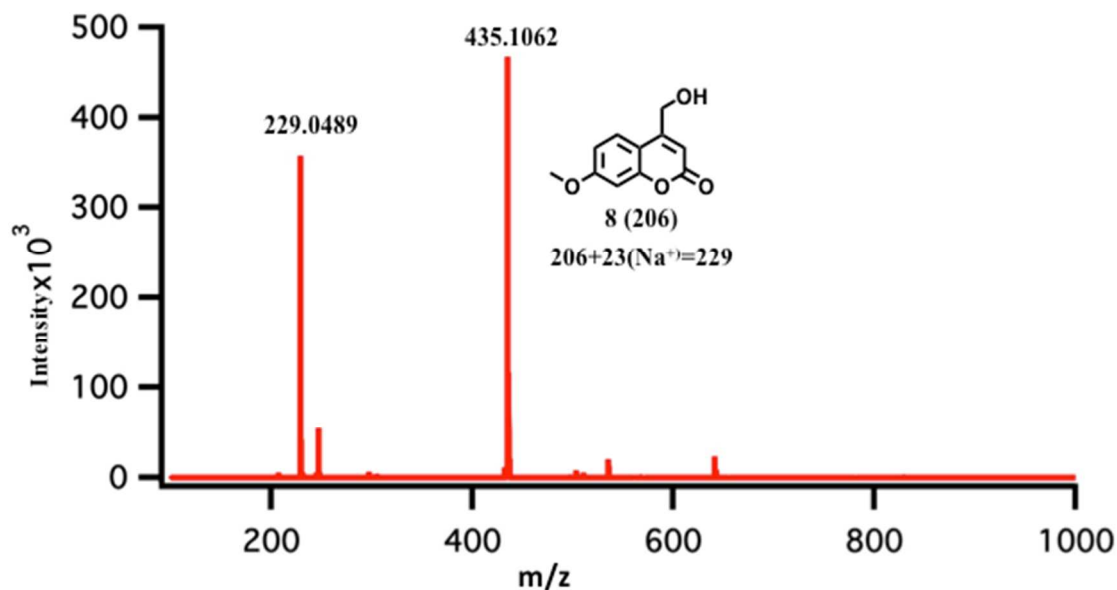

**Figure S31.** ESI mass spectrum of **8** in methanol-chloroform (50:50) containing 0.1 % formic acid.

### 3. Preparation and spectral characterization of host-guest complexes

#### 3.1 Preparation of host-guest complexes of octa acid with phototriggers

UV-Vis spectra were recorded by using a UV-2600 UV-Vis Spectrophotometer (Shimadzu) and the emission spectra were recorded using a FS920CDT Edinburgh fluorimeter. A 60 mM stock solution of the guest was prepared in DMSO, and 12 mL of  $5 \times 10^{-5}$  M of host (OA) solution was prepared at a pH 8.7 using 10 mM  $\text{Na}_2\text{B}_4\text{O}_7$  buffer/ $\text{H}_2\text{O}$ . The solutions of the complexes were prepared by adding 5  $\mu\text{L}$  of the 60 mM guest solution in  $\text{DMSO}-d_6$  (which gave a final guest concentration of  $2.5 \times 10^{-5}$  M) to the prepared host solution ( $5 \times 10^{-5}$  M). After shaking the mixture manually for 2 min, the UV-Vis absorption and the emission spectra were recorded.

About 600  $\mu\text{L}$  of a  $\text{D}_2\text{O}$  solution of host OA (1 mM OA in 10 mM  $\text{Na}_2\text{B}_4\text{O}_7$ , pH = 8.7) was placed in a NMR tube. Then 0.5 equivalent increments of guest solution (5  $\mu\text{L}$  of a 60 mM solution in  $\text{DMSO}-d_6$ ) were added. The  $^1\text{H}$  NMR experiments were carried out after shaking the NMR tube for 2 min after each addition. Complex formation was monitored by the upfield shift of the aliphatic proton peaks of the guest.

### 3.2 UV-Visible absorbance and fluorescence spectra of 1-8

(a) Absorption spectra of coumaryl esters 1 – 7 and 7-methoxy-4-(hydroxymethyl)-2H-chromen-2-one (8) in water in the presence and absence of octa acid.

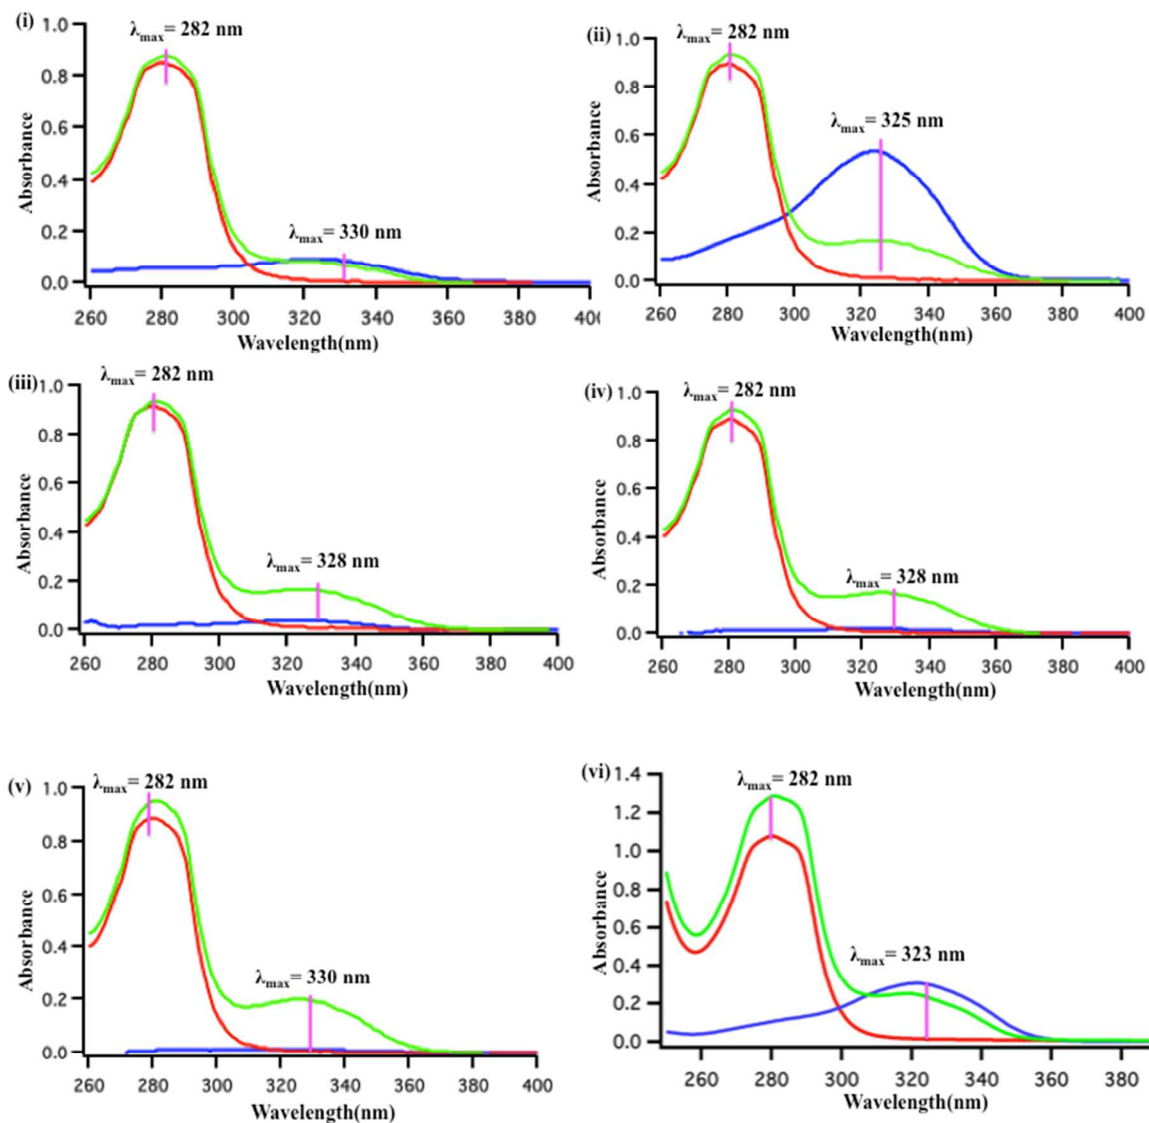

**Figure S32.** (i) UV-Vis absorption spectra of OA (red), 1 (blue) and 1@(OA)<sub>2</sub> (green); (ii) UV-Vis spectra of OA (red), 3 (blue) and 3@(OA)<sub>2</sub> (green) (iii) UV-Vis spectra of OA (red), 5 (blue) and 5@(OA)<sub>2</sub> (green); (iv) UV-Vis spectra of OA (red), 6 (blue) and 6@(OA)<sub>2</sub> (green) (v) UV-Vis spectra of OA (red), 7 (blue) and 7@(OA)<sub>2</sub> (green) (vi) UV-Vis spectra

of OA (red), **8** (blue) and **8**@(OA)<sub>2</sub> (green) at [guest] = 50  $\mu$ M, [OA] = 100  $\mu$ M in Na<sub>2</sub>B<sub>4</sub>O<sub>7</sub> buffer/H<sub>2</sub>O.

**(b) Emission and excitation spectra of coumaryl esters 1 - 7 and 7-methoxy-4-(hydroxymethyl)-2H-chromen-2-one (**8**) in water in the presence and absence of octa acid.**

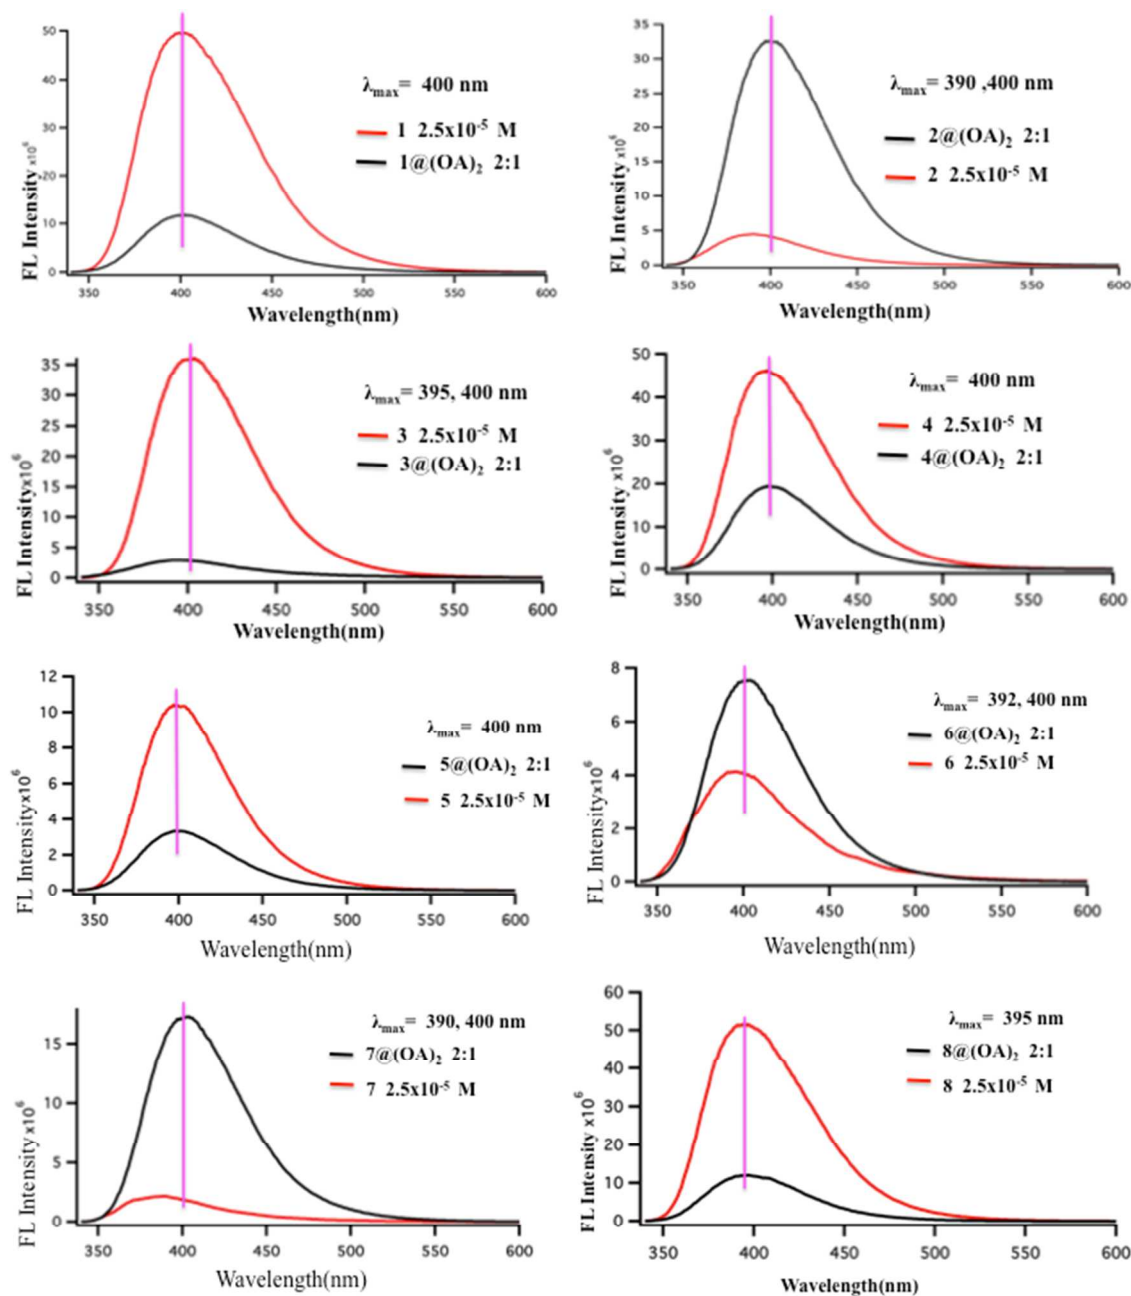

**Figure S33.** Emission spectra ( $\lambda_{\text{exc}} = 330$  nm) of **1**–**8** (red) and corresponding H-G complexes with OA (black) at [**1**–**8**] = 50  $\mu$ M, [OA] = 100  $\mu$ M in Na<sub>2</sub>B<sub>4</sub>O<sub>7</sub> buffer/H<sub>2</sub>O.



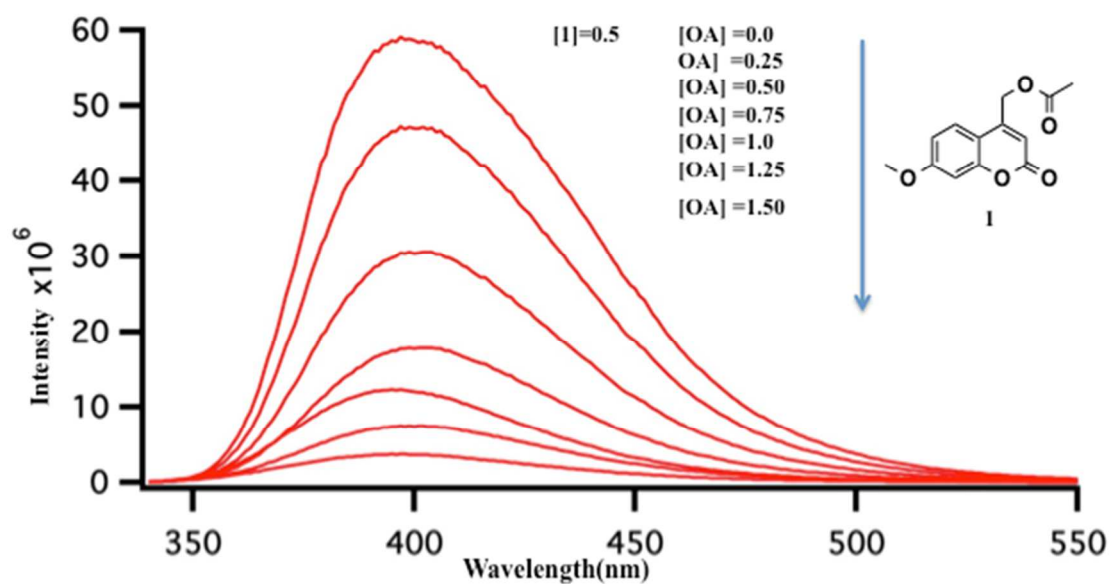

**Figure S34.** Emission ( $\lambda_{\text{exc}} = 330$  nm) titration spectra of **1** with OA ( $[1] = 50$   $\mu\text{M}$ ,  $[OA] =$  increasing from top to bottom in  $\text{Na}_2\text{B}_4\text{O}_7$  buffer/ $\text{H}_2\text{O}$ ).

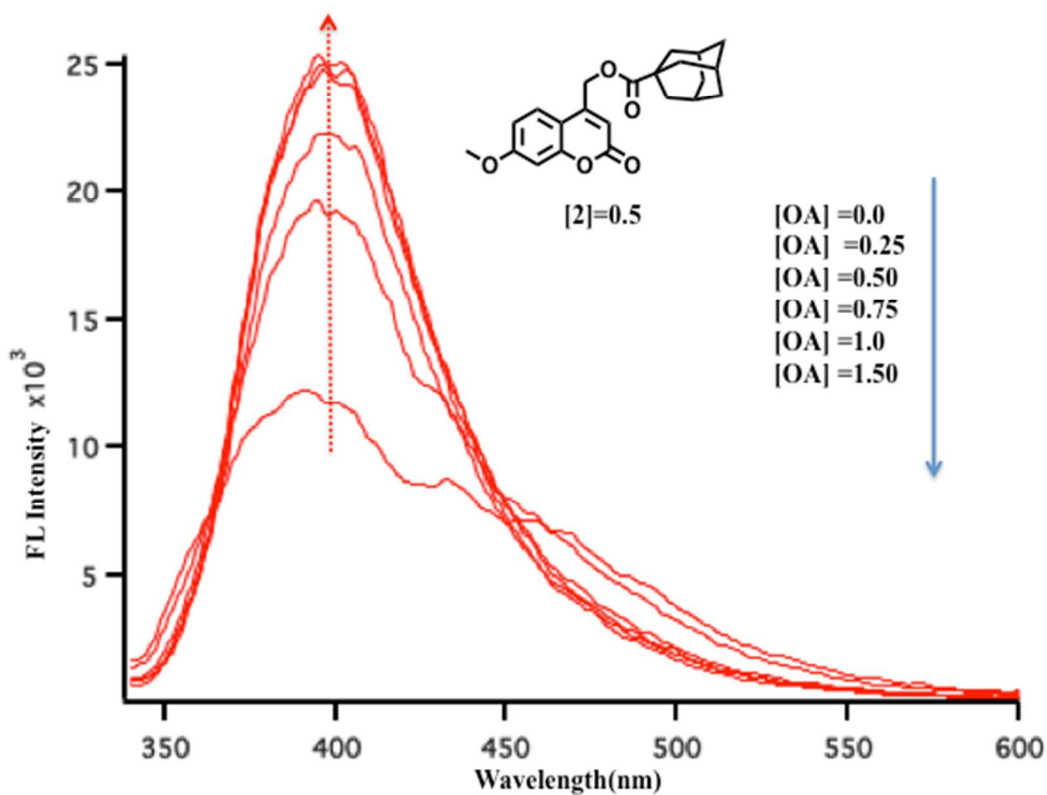

**Figure S35.** Emission ( $\lambda_{\text{exc}} = 330$  nm) titration spectra of **2** with OA ( $[2] = 50$   $\mu\text{M}$ ,  $[OA] =$  increasing from bottom to top in  $\text{Na}_2\text{B}_4\text{O}_7$  buffer/ $\text{H}_2\text{O}$ ).

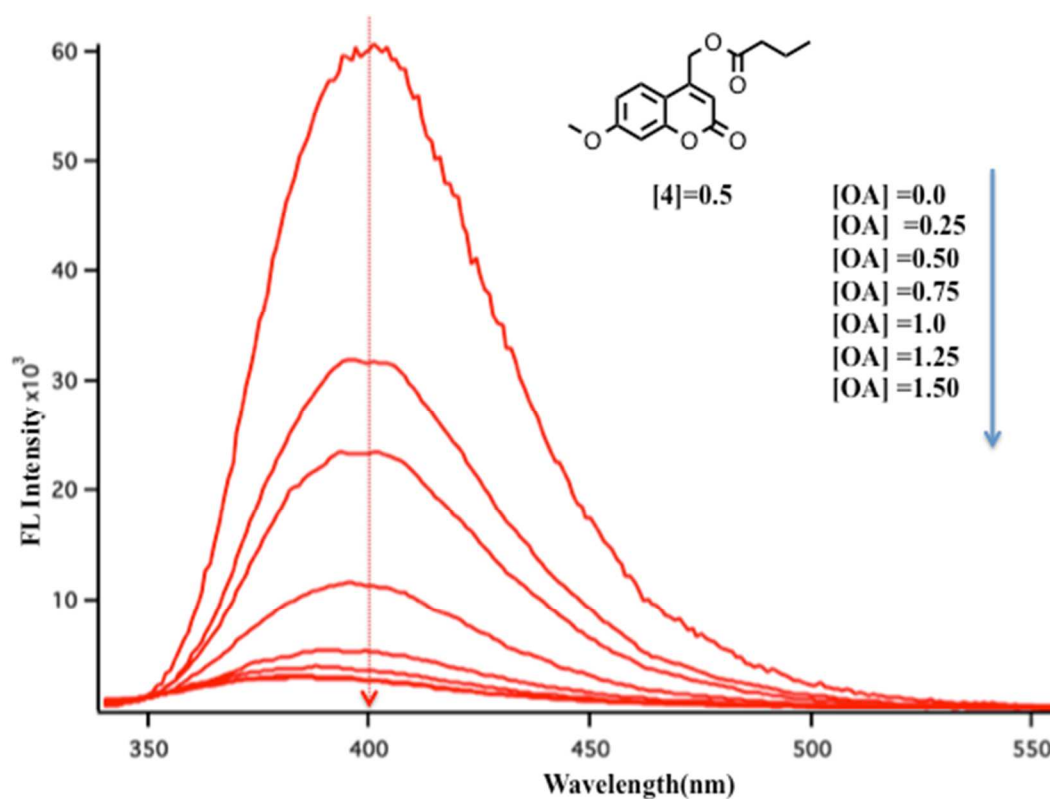

**Figure S36.** Emission ( $\lambda_{\text{exc}} = 330$  nm) titration spectra of **4** with OA ( $[4] = 50$   $\mu\text{M}$ ,  $[OA] =$  increasing from top to bottom in  $\text{Na}_2\text{B}_4\text{O}_7$  buffer/ $\text{H}_2\text{O}$ ).

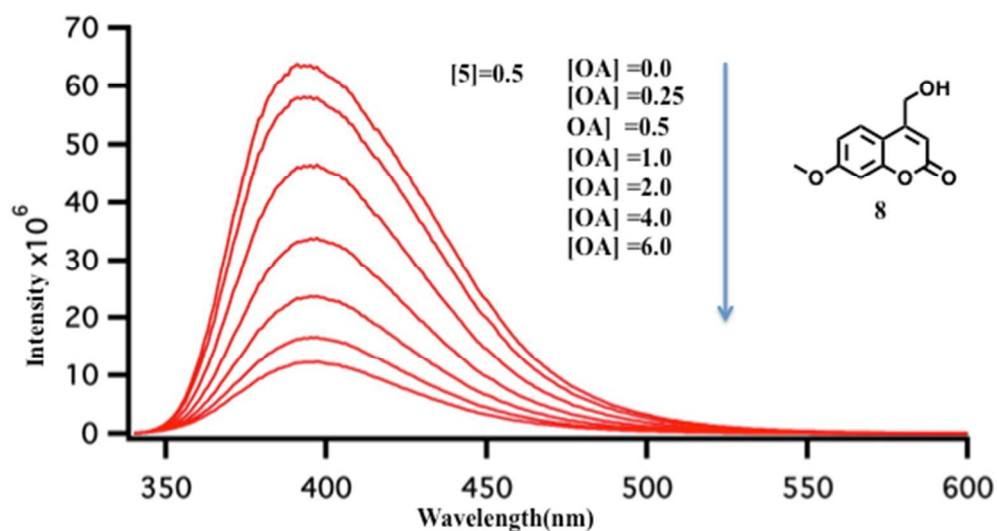

**Figure S37.** Emission ( $\lambda_{\text{exc}} = 330$  nm) titration spectra of **8** with OA ( $[8] = 50$   $\mu\text{M}$ ,  $[OA] =$  increasing from top to bottom in  $\text{Na}_2\text{B}_4\text{O}_7$  buffer/ $\text{H}_2\text{O}$ ).

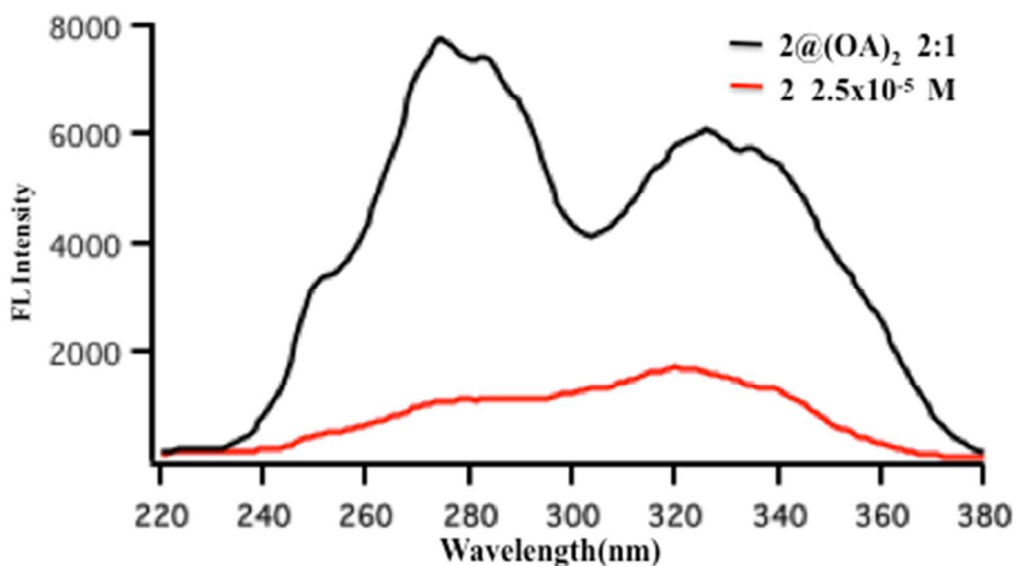

**Figure S38.** Excitation spectra ( $\lambda_{\text{ems}} = 400 \text{ nm}$ ) of **2** (red) and **2**@(**OA**)<sub>2</sub> (black) at [**2**]=50  $\mu\text{M}$ , [**OA**]=100  $\mu\text{M}$  in  $\text{Na}_2\text{B}_4\text{O}_7$  buffer/ $\text{H}_2\text{O}$ ).

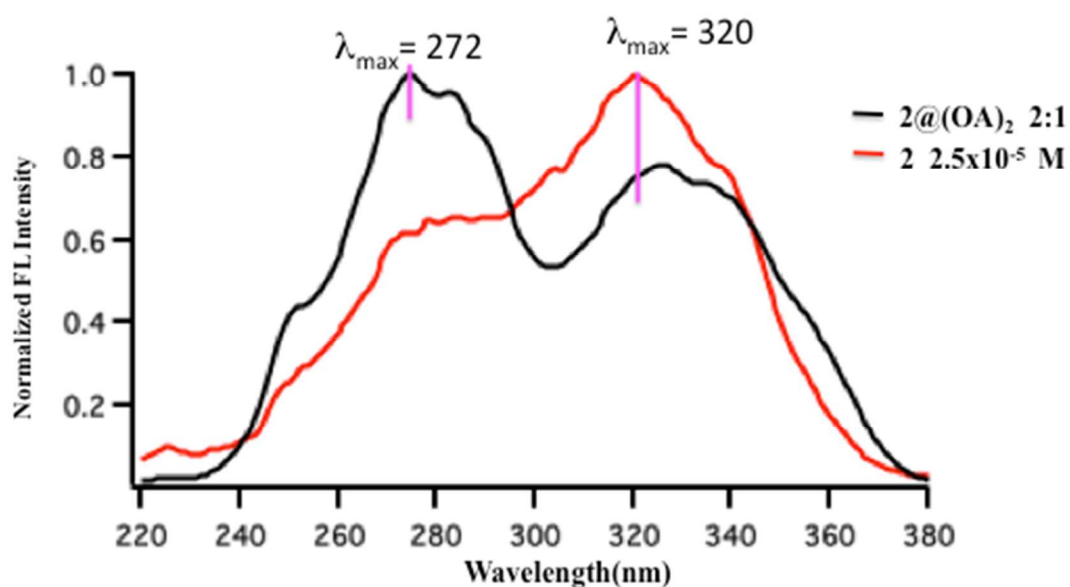

**Figure S39.** Normalized excitation spectra ( $\lambda_{\text{ems}} = 400 \text{ nm}$ ) of **2** (red) and **2**@(**OA**)<sub>2</sub> (black) at [**2**]=50  $\mu\text{M}$ , [**OA**]=100  $\mu\text{M}$  in  $\text{Na}_2\text{B}_4\text{O}_7$  buffer/ $\text{H}_2\text{O}$ ).  $\lambda_{\text{max}} = 272 \text{ nm}$  for **OA** and  $\lambda_{\text{max}} = 320 \text{ nm}$  for **2**).

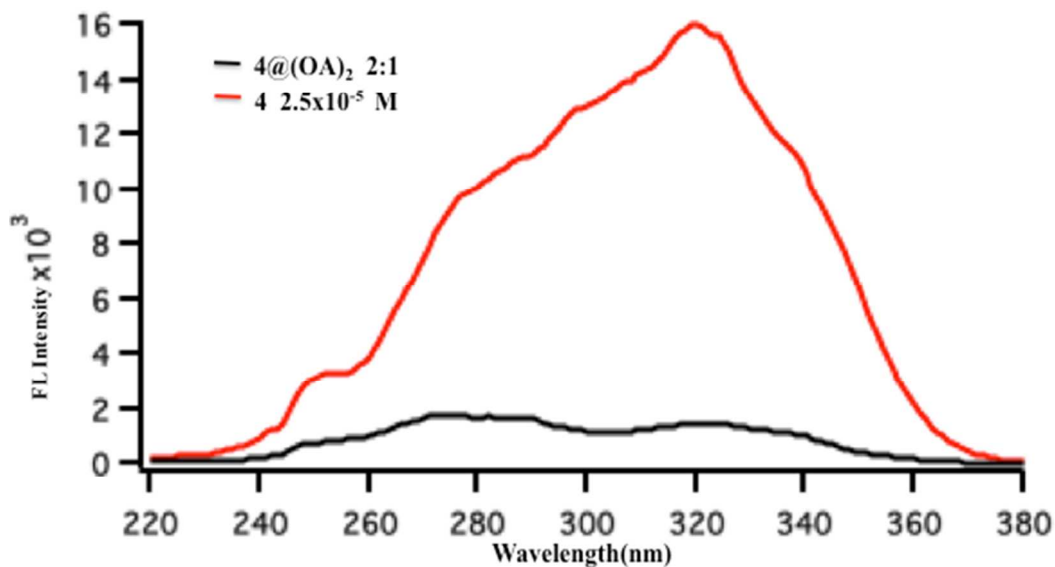

**Figure S40.** Excitation spectra ( $\lambda_{\text{ems}} = 400$  nm) of **4** (red) and **4**@(**OA**)<sub>2</sub> (black) at [**4**] = 50  $\mu\text{M}$ , [**OA**] = 100  $\mu\text{M}$  in  $\text{Na}_2\text{B}_4\text{O}_7$  buffer/ $\text{H}_2\text{O}$ ).

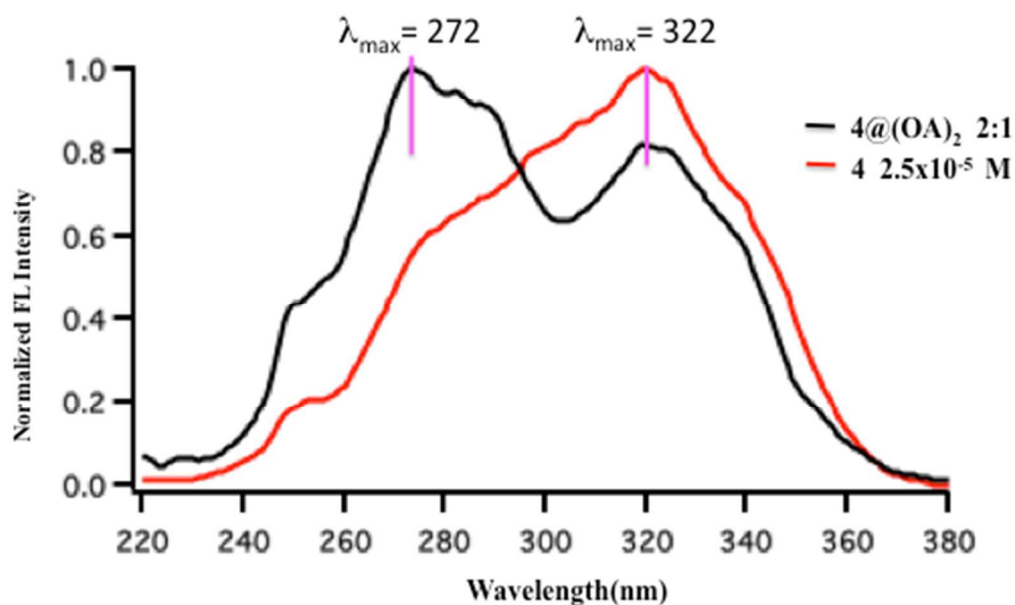

**Figure S41.** Normalized excitation spectra ( $\lambda_{\text{ems}} = 400$  nm) of **4** (red) and **4**@(**OA**)<sub>2</sub> (black) at [**4**] = 50  $\mu\text{M}$ , [**OA**] = 100  $\mu\text{M}$  in  $\text{Na}_2\text{B}_4\text{O}_7$  buffer/ $\text{H}_2\text{O}$ . ( $\lambda_{\text{max}} = 272$  nm of **OA** and  $\lambda_{\text{max}} = 322$  nm of **4**).

3.3.  $^1\text{H}$ NMR titration spectra of OA and compounds 1-8, and correspondent DOSY and COSY NMR spectra.

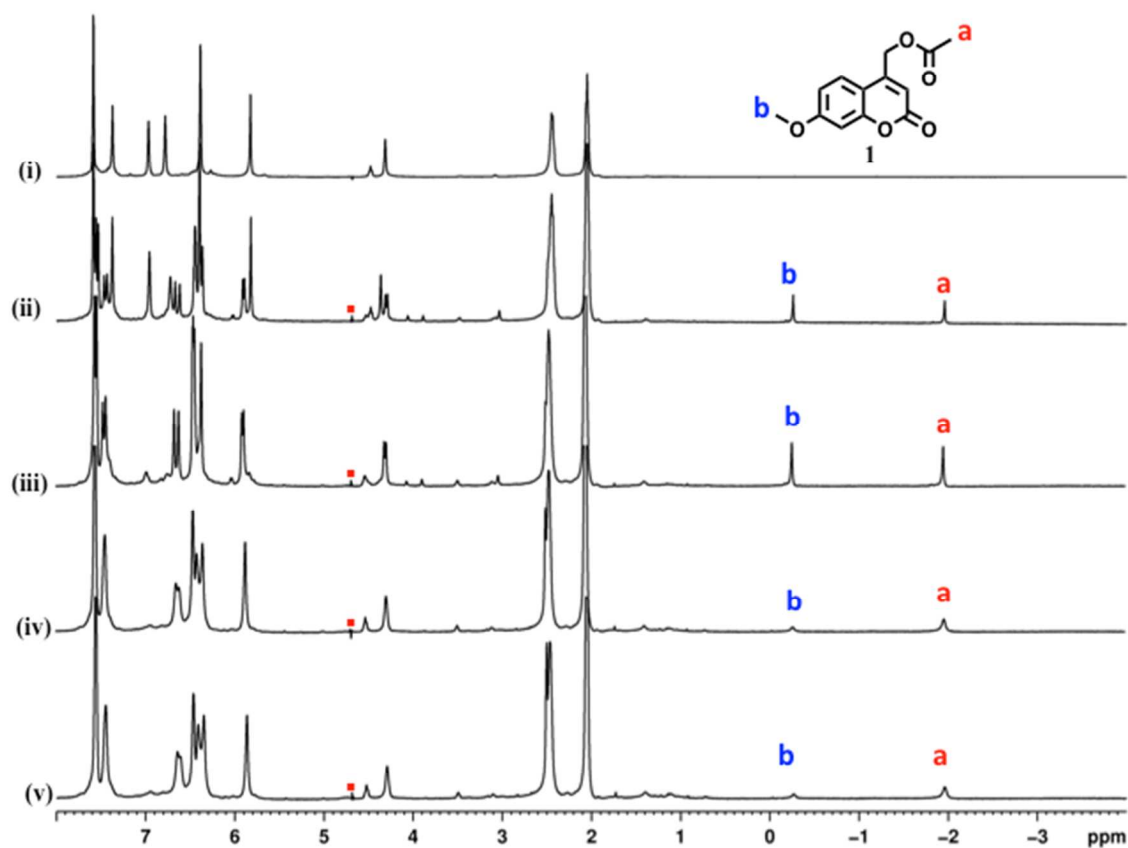

**Figure S42.**  $^1\text{H}$  NMR (500 MHz, 10 mM  $\text{Na}_2\text{B}_4\text{O}_7$  buffer/ $\text{D}_2\text{O}$ , pH = 8.7) spectra of (i) OA ( $[\text{OA}] = 1 \text{ mM}$ ) (ii) **1**@OA (OA=1 mM,  $[\text{1}] = 0.25 \text{ mM}$ ); (iii) **1**@OA (OA=1 mM,  $[\text{1}] = 0.5 \text{ mM}$ ); (iv) **1**@OA (OA=1 mM,  $[\text{1}] = 0.75 \text{ mM}$ ); (v) **1**@OA (OA=1 mM,  $[\text{1}] = 1.0 \text{ mM}$ ). ■ indicates the residual solvent peak of water.

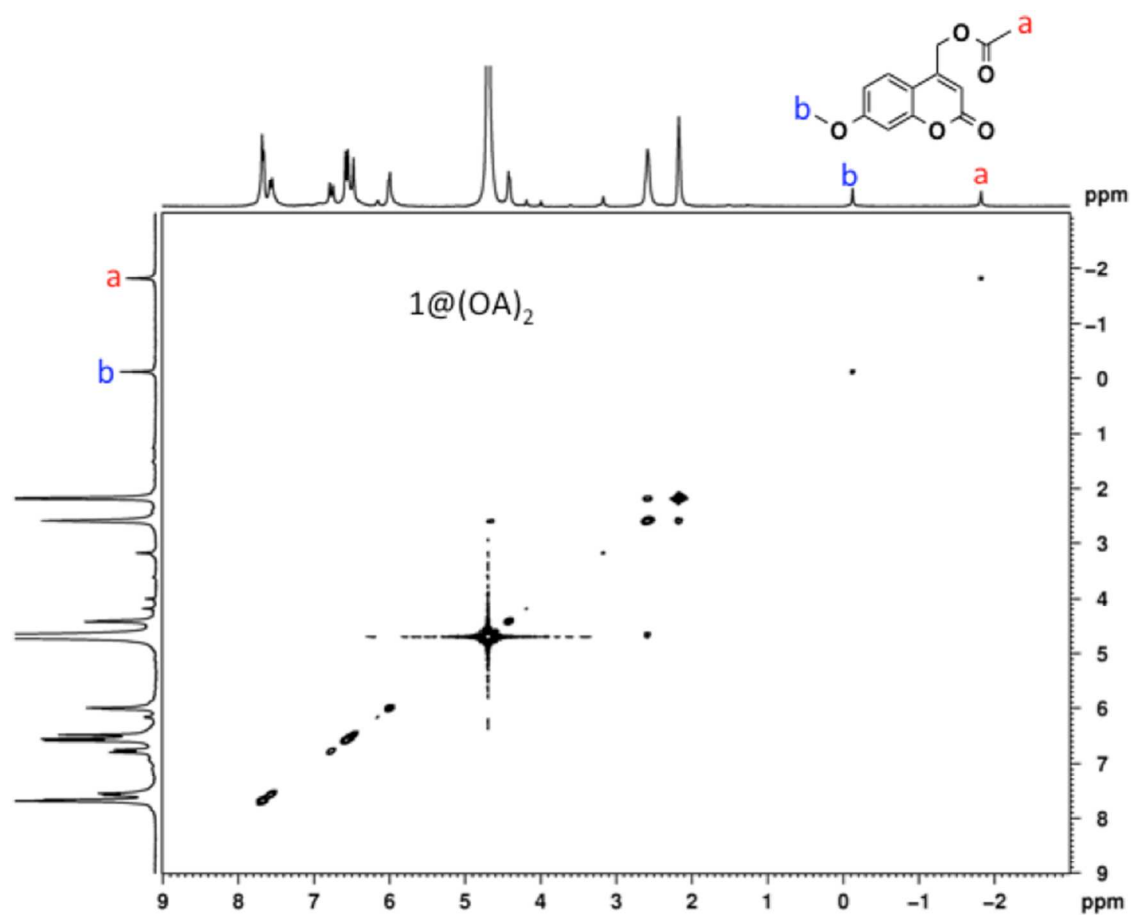

**Figure S43.**  $^1H$ -NMR (500 MHz) COSY spectra of complex  $1@(OA)_2$

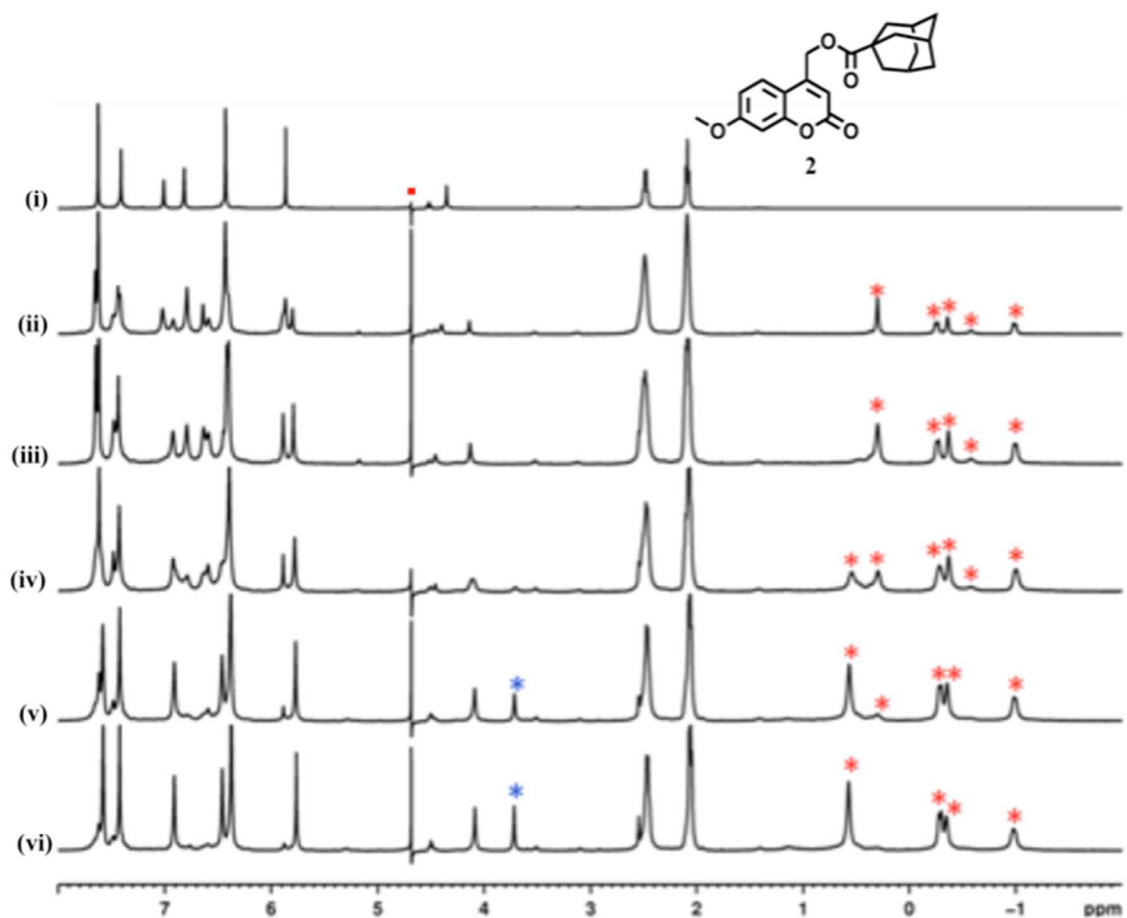

**Figure S44.**  $^1\text{H}$  NMR (500 MHz, 10 mM  $\text{Na}_2\text{B}_4\text{O}_7$  buffer/ $\text{D}_2\text{O}$ , pH = 8.7) (i) OA ( $[\text{OA}] = 1$  mM) (ii) **2**@OA (OA=1 mM,  $[\text{2}] = 0.25$  mM); (iii) **2**@OA (OA=1 mM,  $[\text{2}] = 0.5$  mM); (iv) **2**@OA (OA=1 mM,  $[\text{2}] = 0.75$  mM); (v) **2**@OA (OA=1 mM,  $[\text{2}] = 1.0$  mM); (vi) **2**@OA (OA=1 mM,  $[\text{2}] = 1.5$  mM). ■ indicates the residual solvent peak of water.

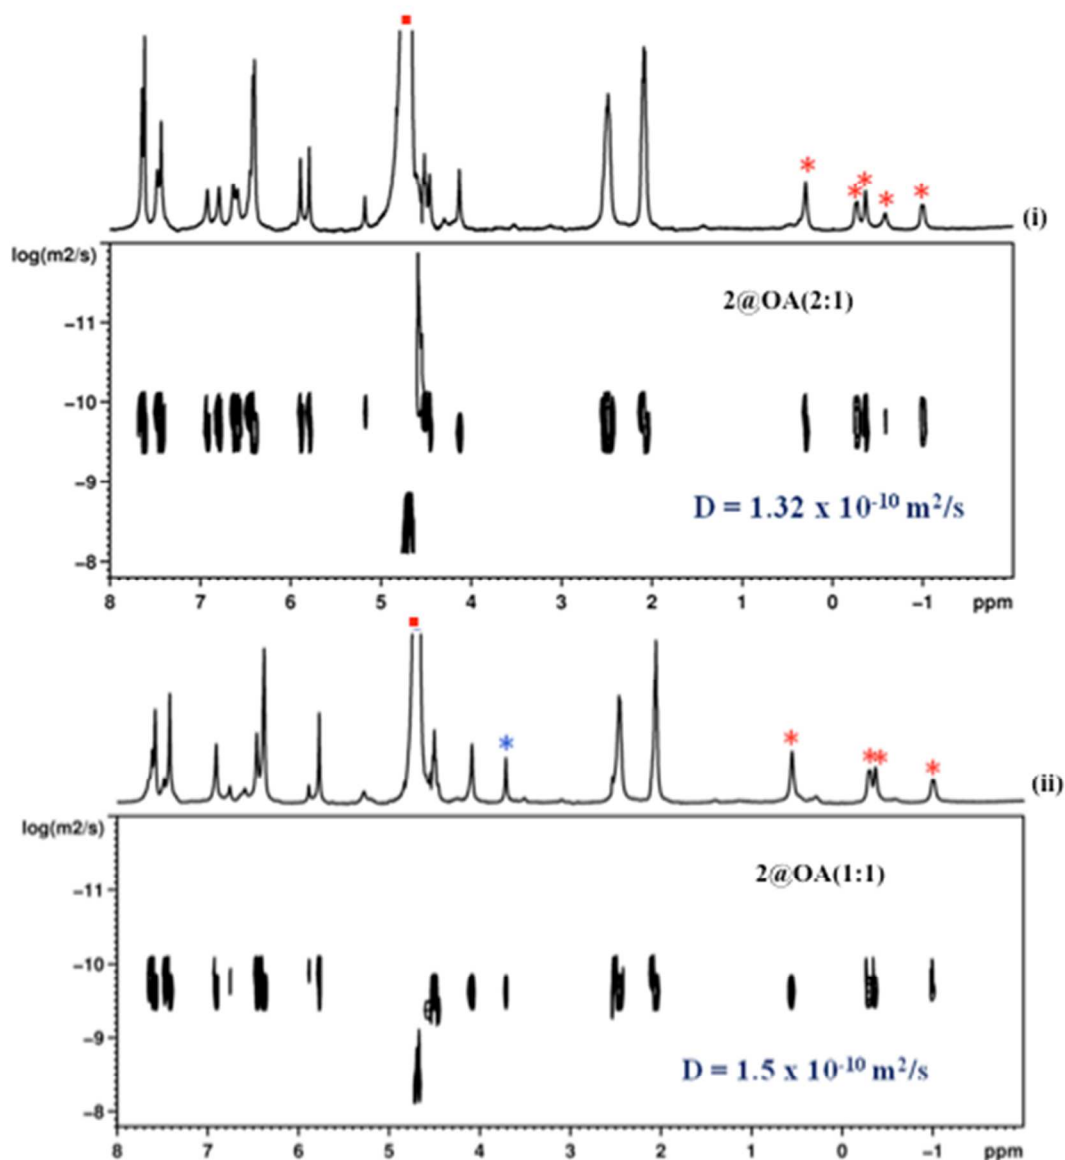

**Figure S45.** 2D DOSY NMR (500 MHz, 10 mM  $\text{Na}_2\text{B}_4\text{O}_7$  buffer/ $\text{D}_2\text{O}$ , pH = 8.7) spectra of (i) **2@**(OA)<sub>2</sub> ([OA] = 1 mM and [**2**] = 0.5 mM) (ii) **2@**OA ([OA] = 1 mM and [**2**] = 1 mM) “\*” indicates the OA bound guest **2** aliphatic proton peaks. “\*” indicates the -OMe proton peak of **2** for **2@**OA (1:1) complex. ■ indicates the residual solvent peak of water.



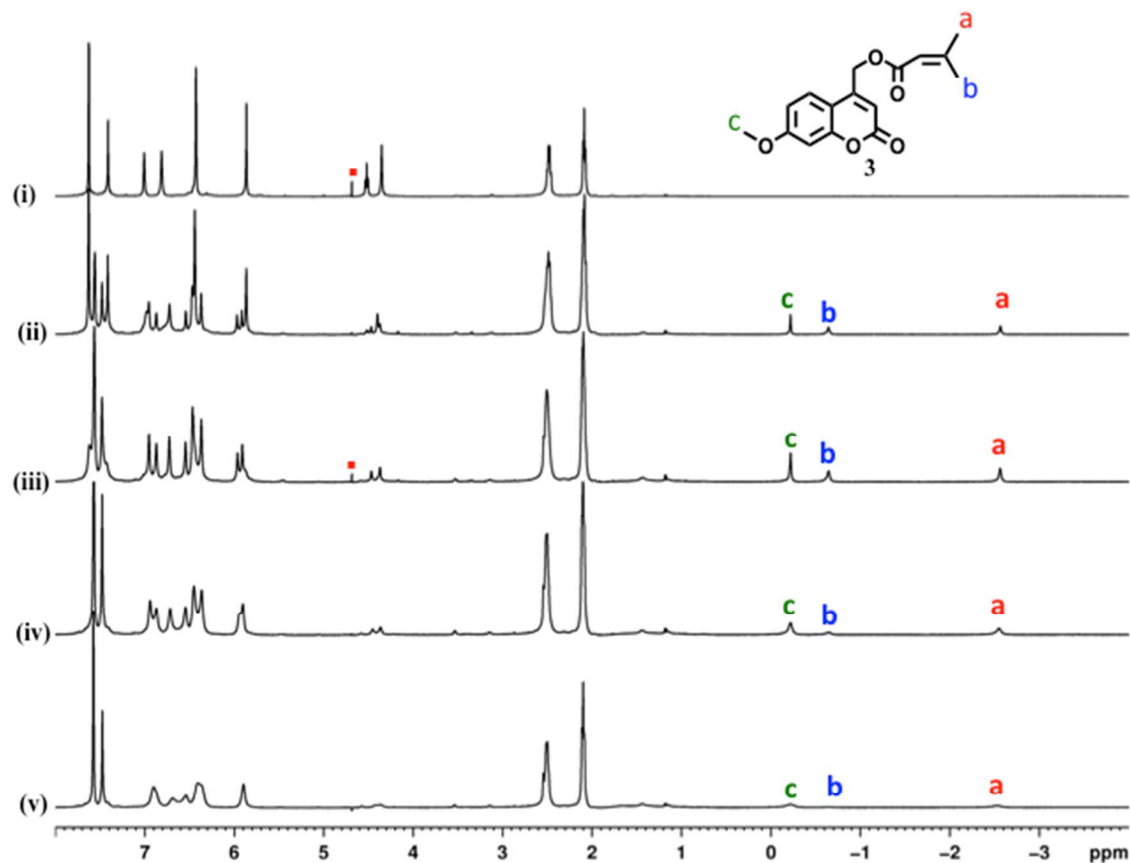

**Figure S46.**  $^1\text{H}$  NMR (500 MHz, 10 mM  $\text{Na}_2\text{B}_4\text{O}_7$  buffer/ $\text{D}_2\text{O}$ , pH = 8.7) spectra of (i) OA ( $[\text{OA}] = 1$  mM); (ii) **3**@OA (OA=1 mM, **[3]** = 0.25 mM); (iii) **3**@OA (OA=1 mM, **[3]** = 0.5 mM); (iv) **3**@OA (OA=1 mM, **[3]** = 0.75 mM); (v) **3**@OA (OA=1 mM, **[3]** = 1 mM). ■ indicates the residual solvent peak of water.

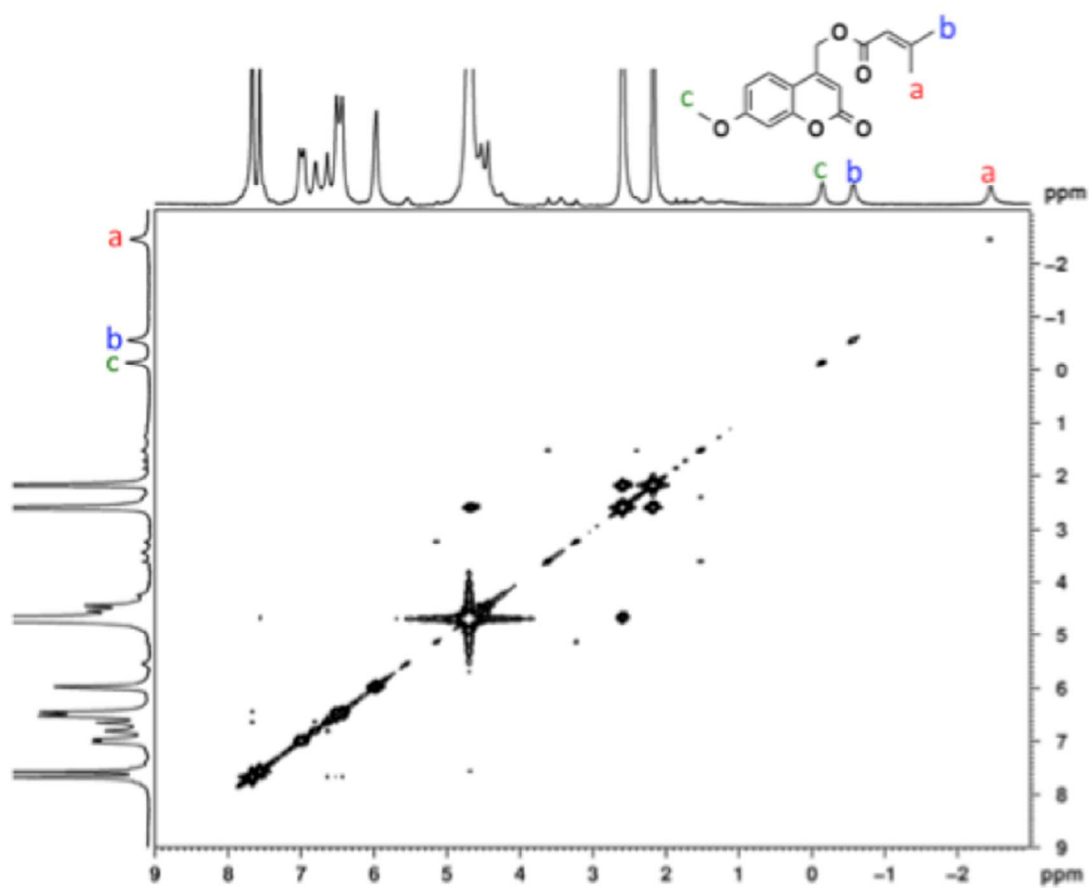

**Figure S47.** <sup>1</sup>H-NMR (500 MHz) COSY spectra of complex **3**@(OA)<sub>2</sub>

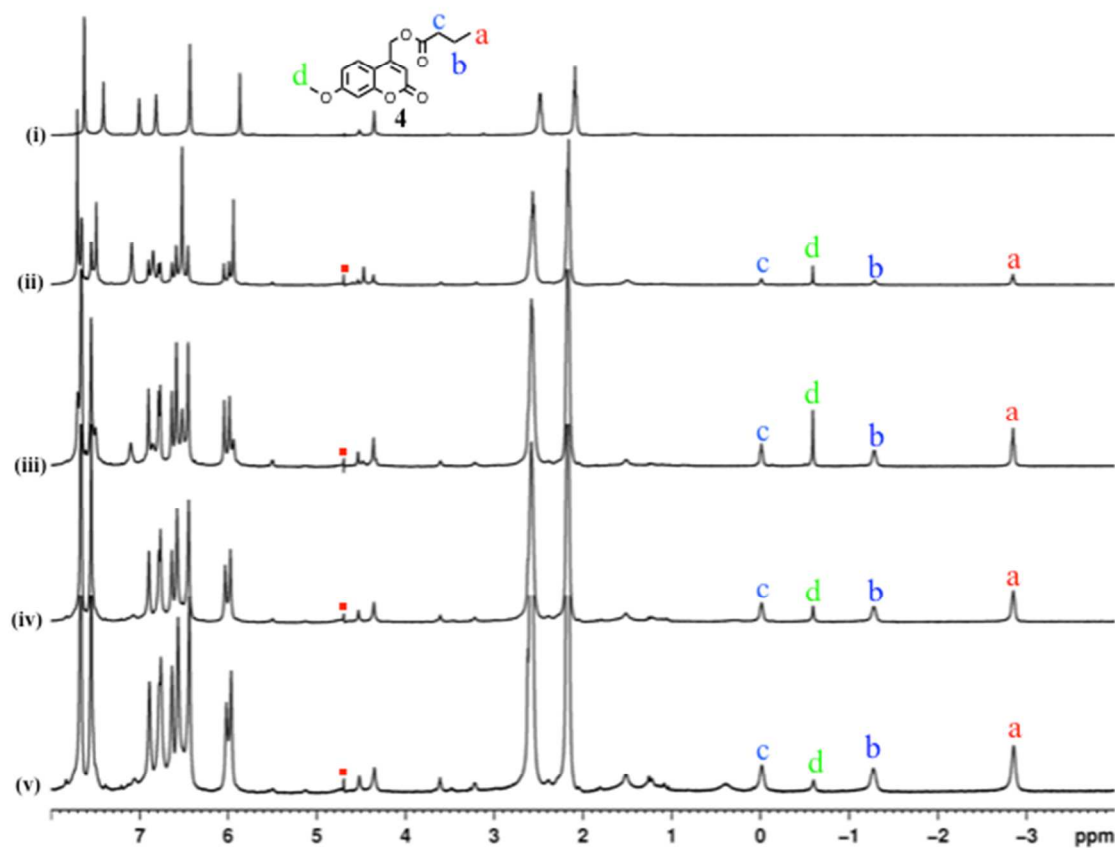

**Figure S48.**  $^1\text{H}$  NMR (500 MHz, 10 mM  $\text{Na}_2\text{B}_4\text{O}_7$  buffer/ $\text{D}_2\text{O}$ , pH = 8.7) spectra of (i) OA ([OA] = 1 mM); (ii) **4**@OA (OA=1 mM, [**4**] = 0.25 mM); (iii) **4**@OA (OA=1 mM, [**4**] = 0.5 mM); (iv) **4**@OA (OA=1 mM, [**4**] = 0.75 mM); (v) **4**@OA (OA=1 mM, [**4**] = 1 mM). ■ indicates the residual solvent peak of water.

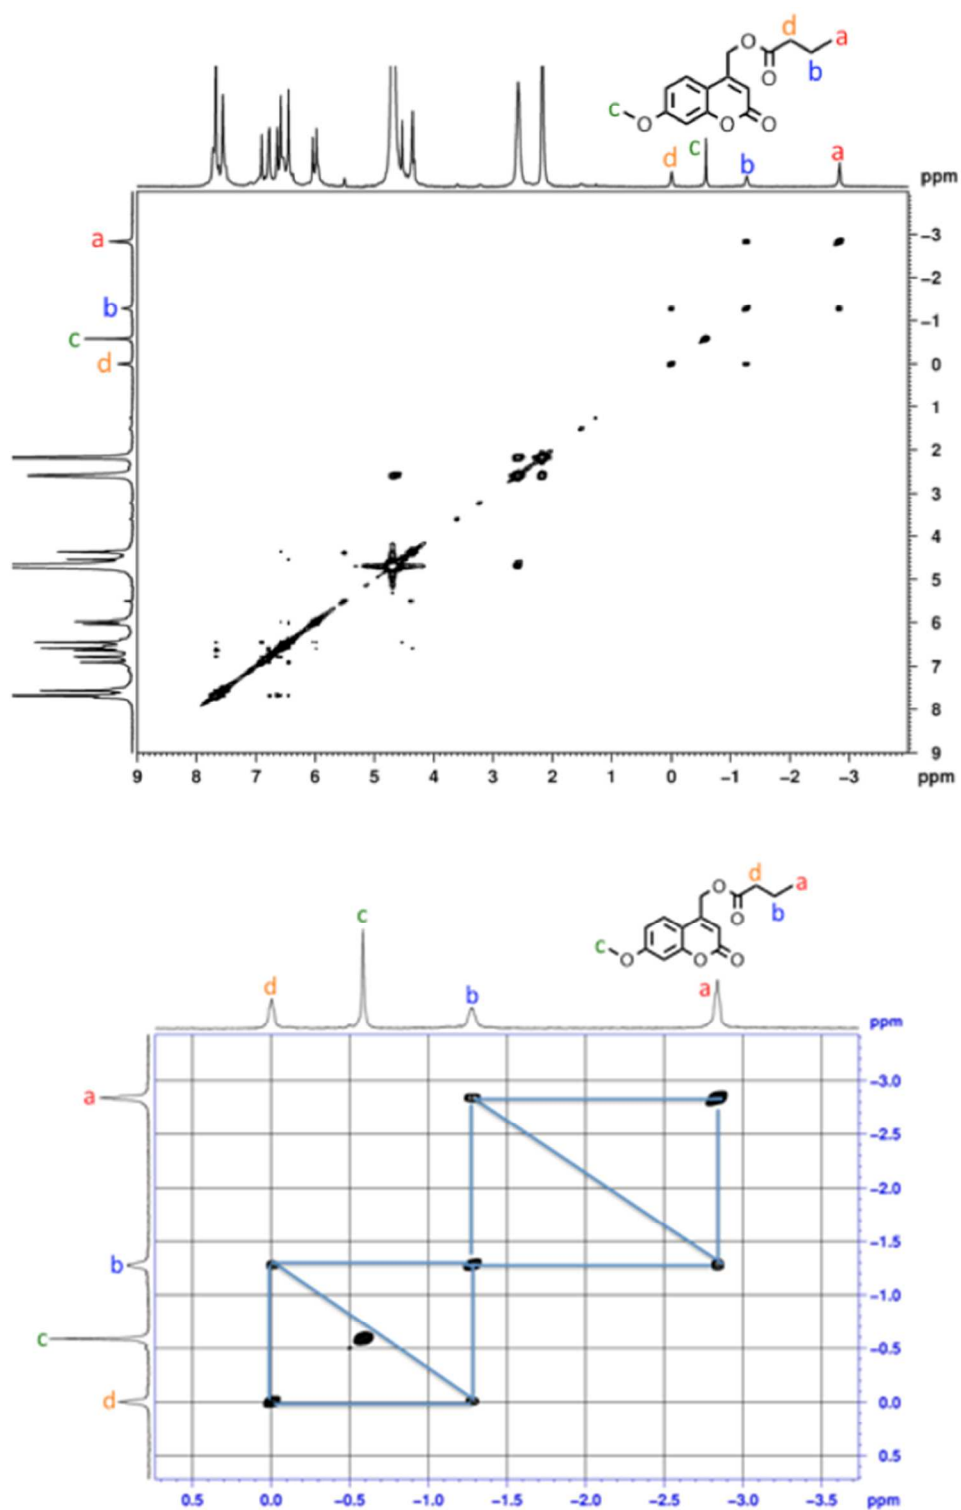

**Figure S49**  $^1\text{H}$ -NMR (500 MHz) COSY spectra of complex  $4@(\text{OA})_2$

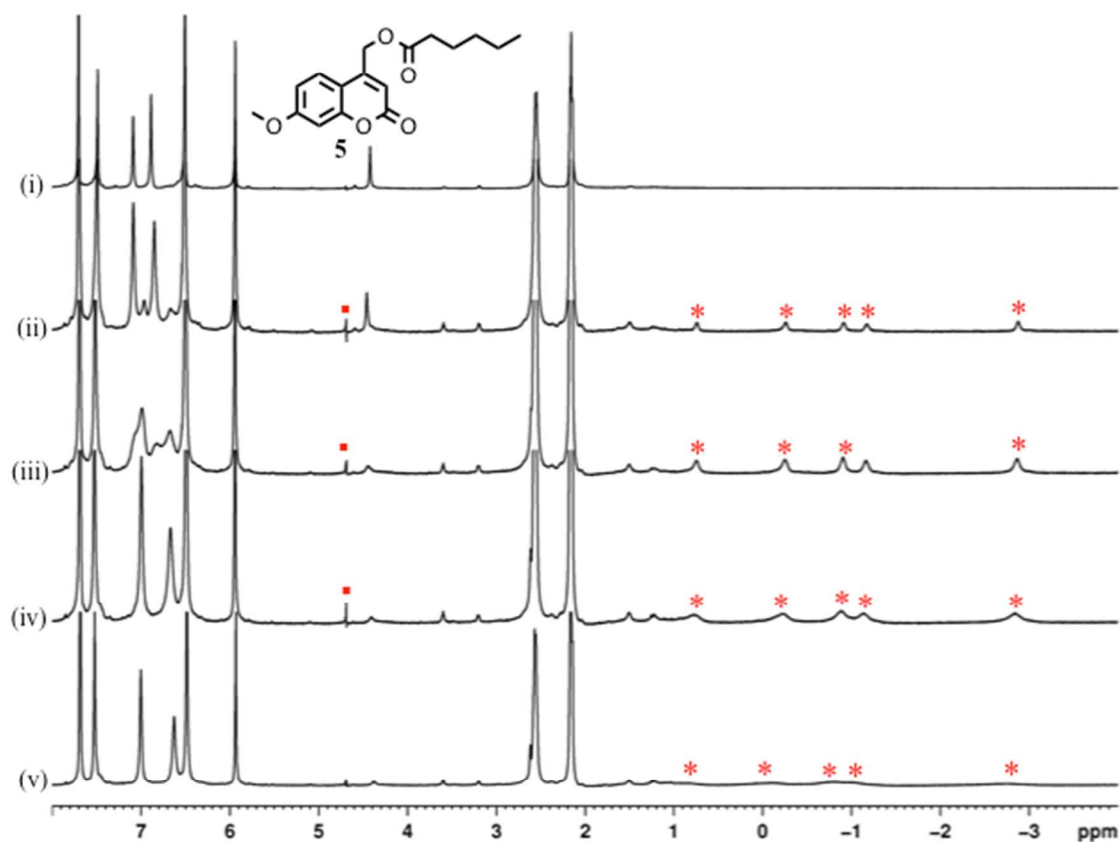

**Figure S50.**  $^1\text{H}$  NMR (500 MHz, 10 mM  $\text{Na}_2\text{B}_4\text{O}_7$  buffer/ $\text{D}_2\text{O}$ , pH = 8.7) spectra of (i) OA ([OA] = 1 mM); (ii) **5**@OA (OA=1 mM, [**5**] = 0.25 mM); (iii) **5**@OA (OA=1 mM, [**5**] = 0.5 mM); (iv) **5**@OA (OA=1 mM, [**5**] = 0.75 mM); (v) **5**@OA (OA=1 mM, [**5**] = 1 mM). ■ indicates the residual solvent peak of water.

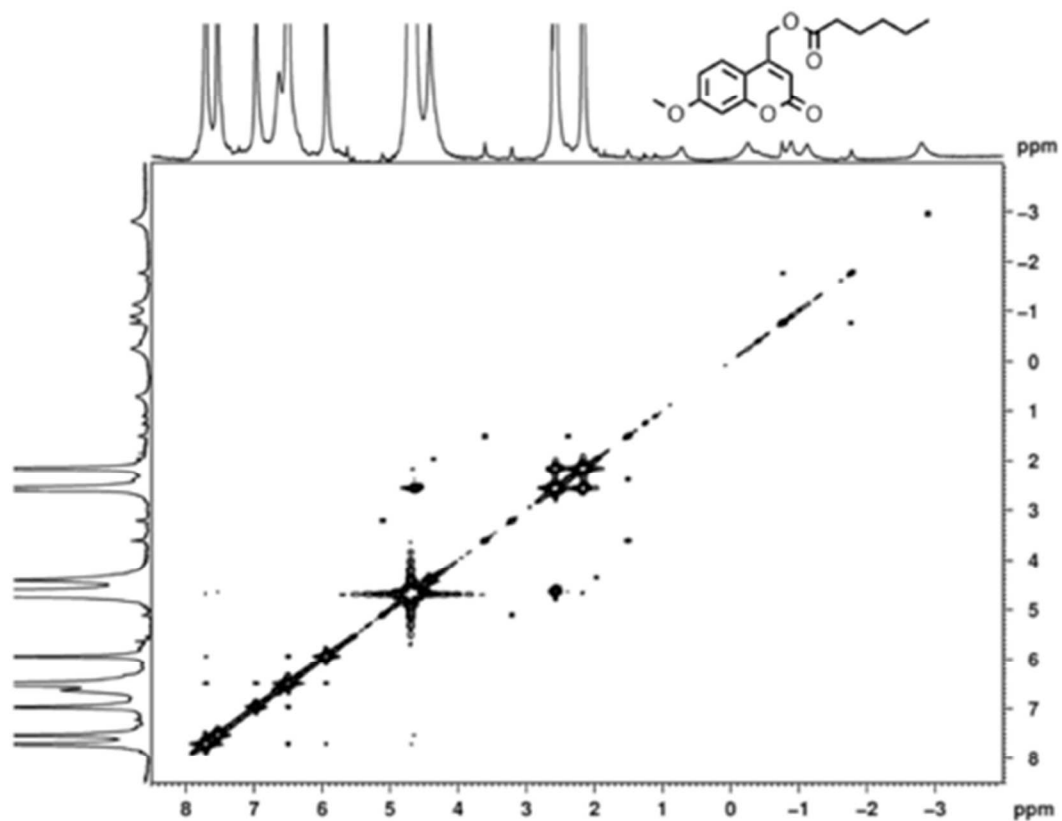

**Figure S51** <sup>1</sup>H-NMR (500 MHz) COSY spectra of complex **5**@(OA)<sub>2</sub>.

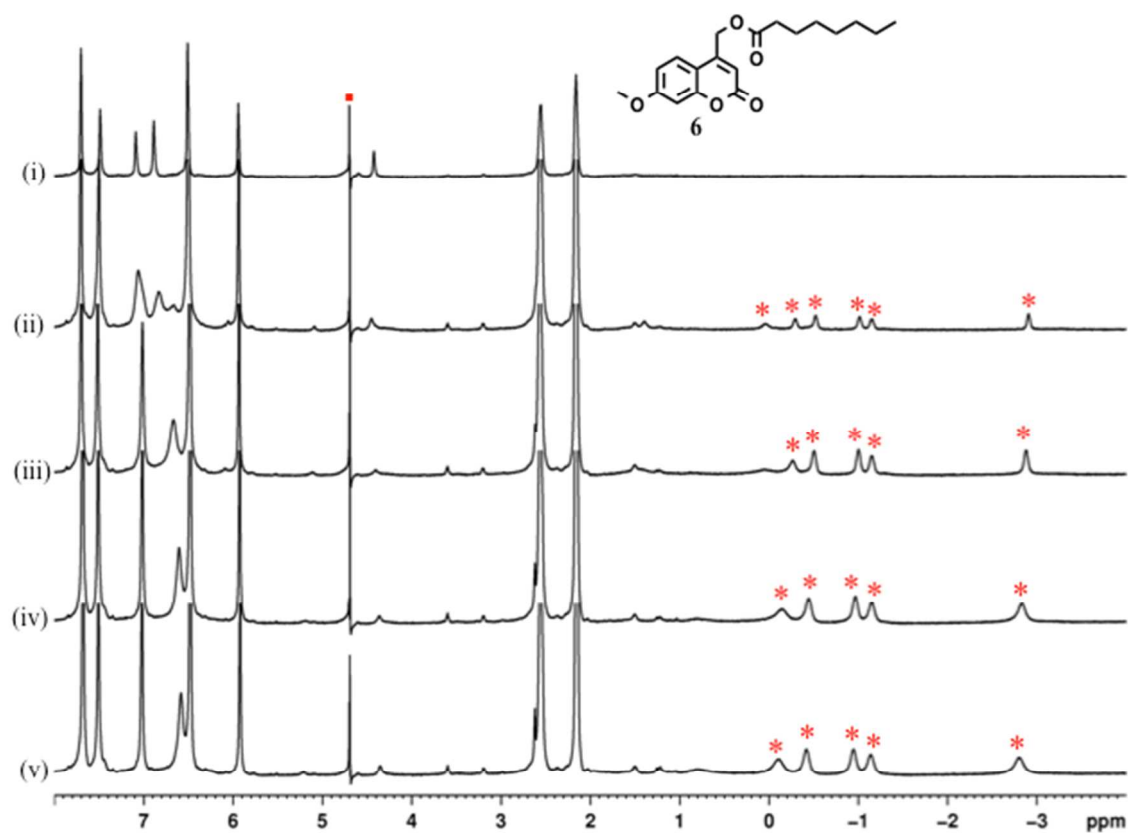

**Figure S52.**  $^1\text{H}$  NMR (500 MHz, 10 mM  $\text{Na}_2\text{B}_4\text{O}_7$  buffer/ $\text{D}_2\text{O}$ , pH = 8.7) spectra of (i) OA ([OA] = 1 mM); (ii) **6**@OA (OA=1 mM, [**6**] = 0.25 mM); (iii) **6**@OA (OA=1 mM, [**6**] = 0.5 mM); (iv) **6**@OA (OA=1 mM, [**6**] = 0.75 mM); (v) **6**@OA (OA=1 mM, [**6**] = 1 mM). ■ indicates the residual solvent peak of water.

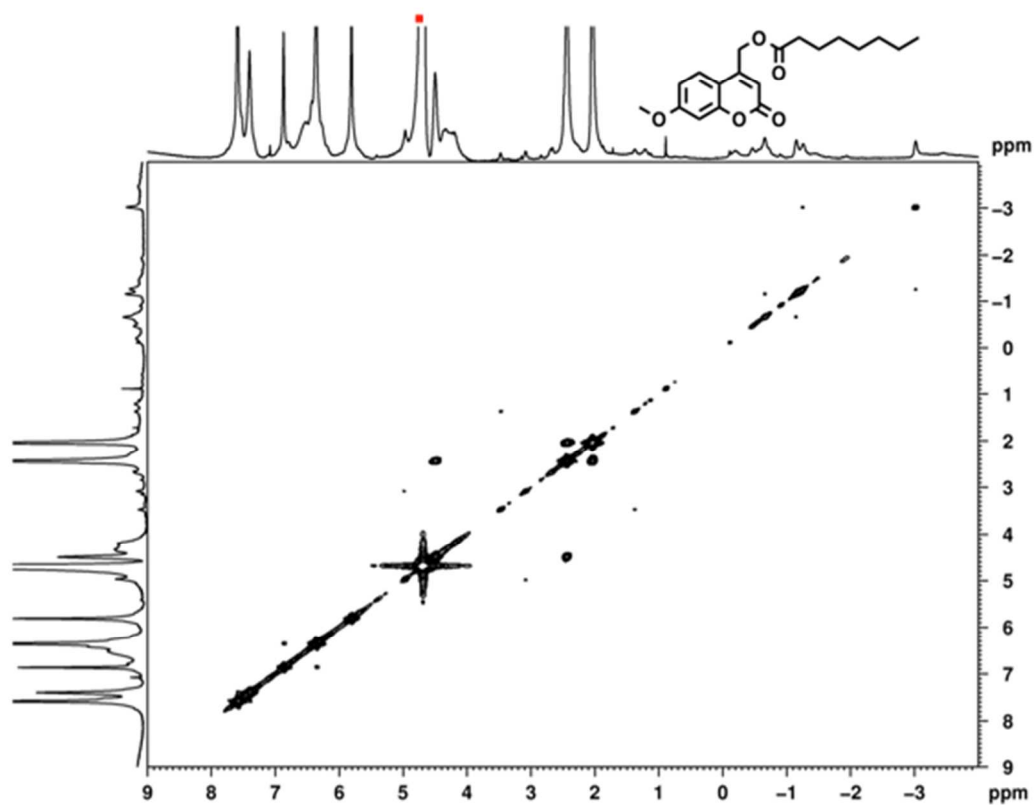

**Figure S53.** <sup>1</sup>H-NMR (500 MHz) COSY spectra of complex 6@(OA)<sub>2</sub>.



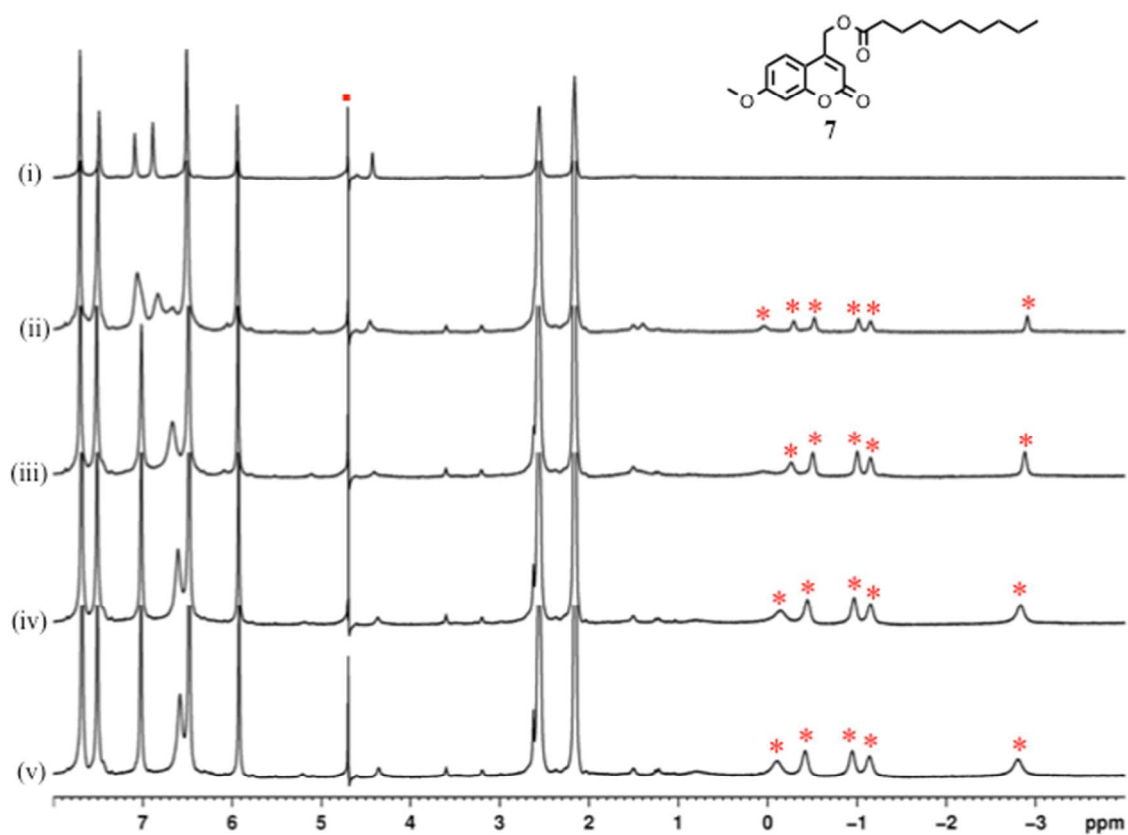

**Figure S54.**  $^1\text{H}$  NMR (500 MHz, 10 mM  $\text{Na}_2\text{B}_4\text{O}_7$  buffer/ $\text{D}_2\text{O}$ , pH = 8.7) spectra of (i) OA ( $[\text{OA}] = 1$  mM); (ii) **7**@OA (OA=1 mM,  $[\text{7}] = 0.25$  mM); (iii) **7**@OA (OA=1 mM,  $[\text{7}] = 0.5$  mM); (iv) **7**@OA (OA=1 mM,  $[\text{7}] = 0.75$  mM); (v) **7**@OA (OA=1 mM,  $[\text{7}] = 1$  mM). ■ indicates the residual solvent peak of water.

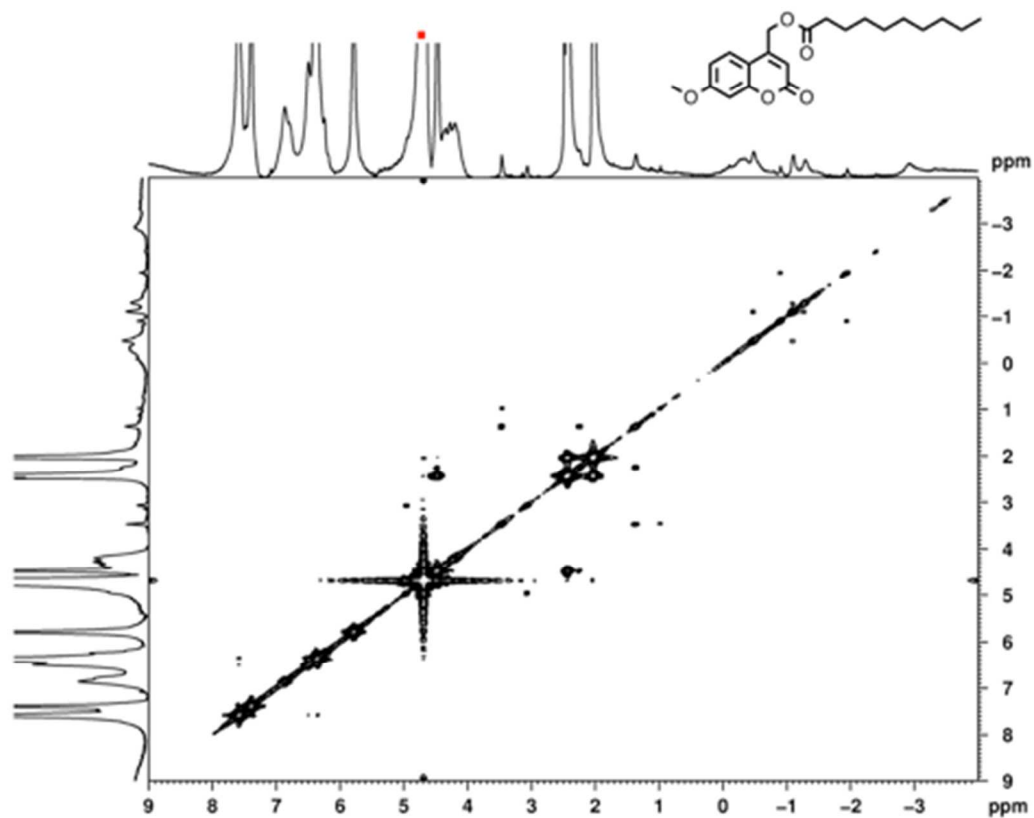

**Figure S55** <sup>1</sup>H-NMR (500 MHz) COSY spectra of complex 7@(OA)<sub>2</sub>.

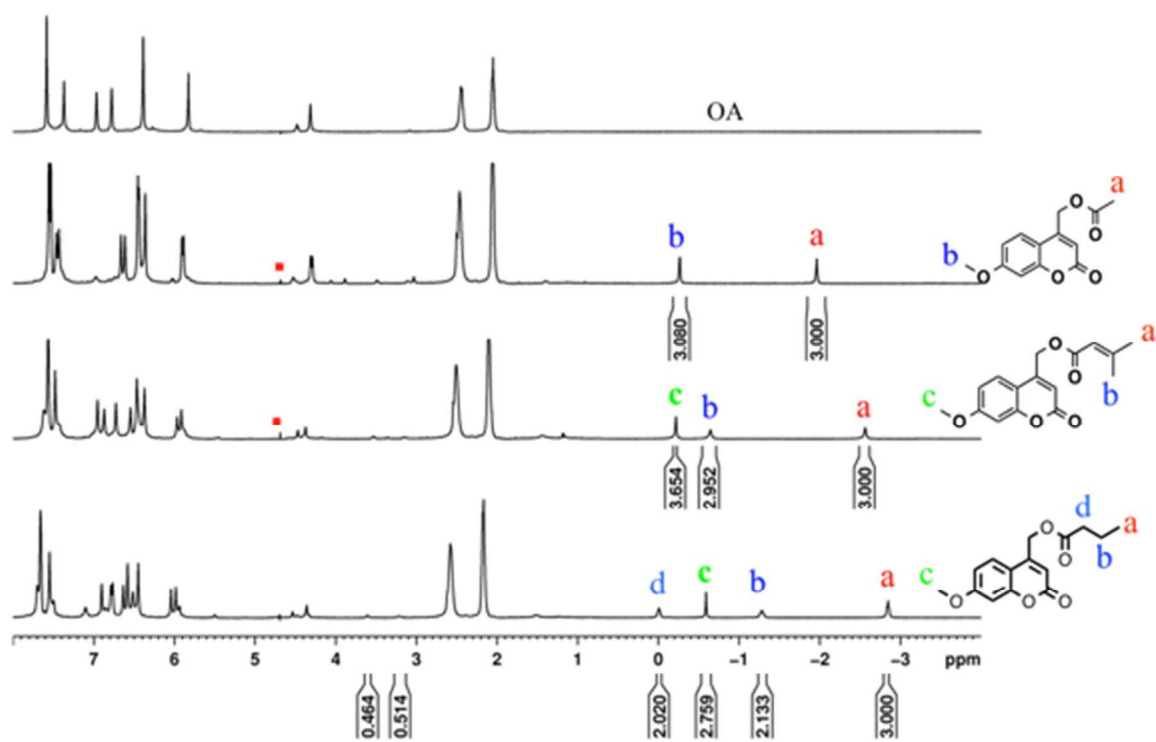

**Figure S56.** Integrated  $^1\text{H}$ -NMR (500 MHz) spectra of complex  $1@(\text{OA})_2$ ,  $3@(\text{OA})_2$ , and  $4@(\text{OA})_2$ .

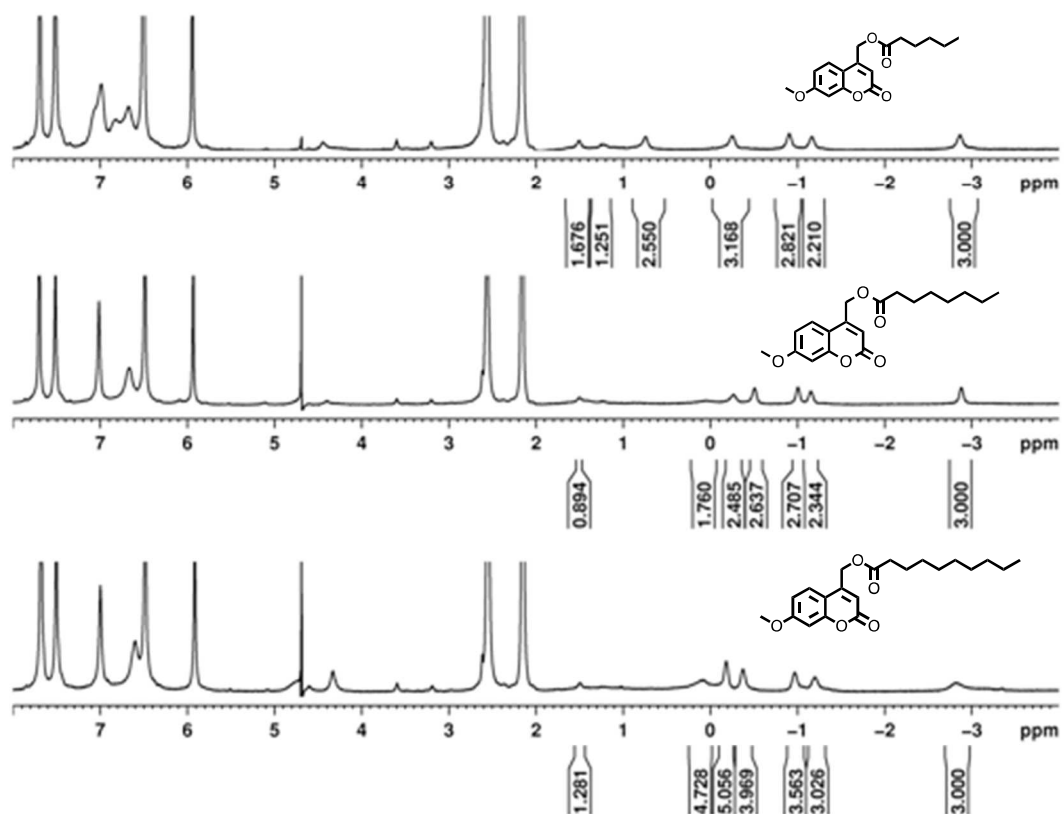

**Figure S57.** Integrated  $^1\text{H}$ -NMR (500 MHz) spectra of complex **5@**(OA)<sub>2</sub>, **6@**(OA)<sub>2</sub>, and **7@**(OA)<sub>2</sub>.

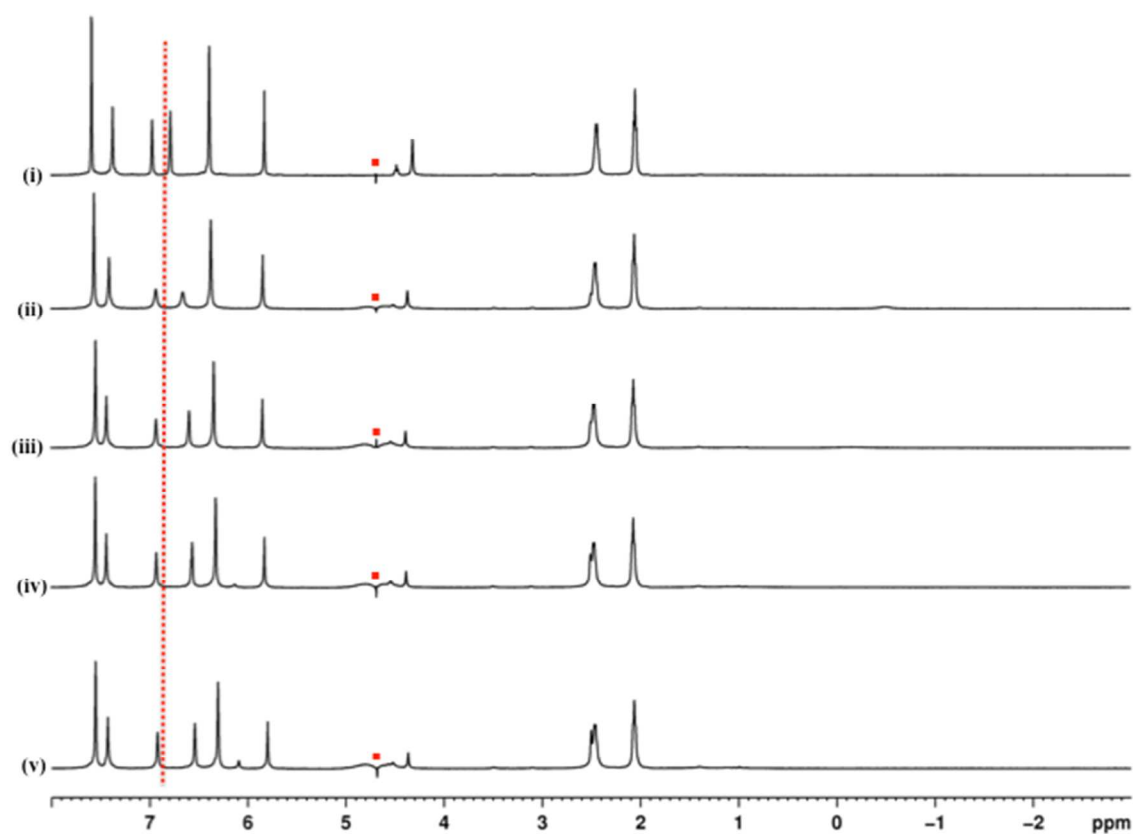

**Figure S58.**  $^1\text{H}$  NMR (500 MHz, 10 mM  $\text{Na}_2\text{B}_4\text{O}_7$  buffer/ $\text{D}_2\text{O}$ , pH = 8.7) spectra of (i) OA ( $[\text{OA}] = 1$  mM) (ii) **8**@OA (OA=1 mM,  $[\text{8}] = 0.25$  mM); (iii) **8**@OA (OA=1 mM,  $[\text{8}] = 0.5$  mM); (iv) **8**@OA (OA=1 mM,  $[\text{8}] = 0.75$  mM); (v) **8**@OA (OA=1 mM,  $[\text{8}] = 1.0$  mM). ■ indicates the residual solvent peak of water.

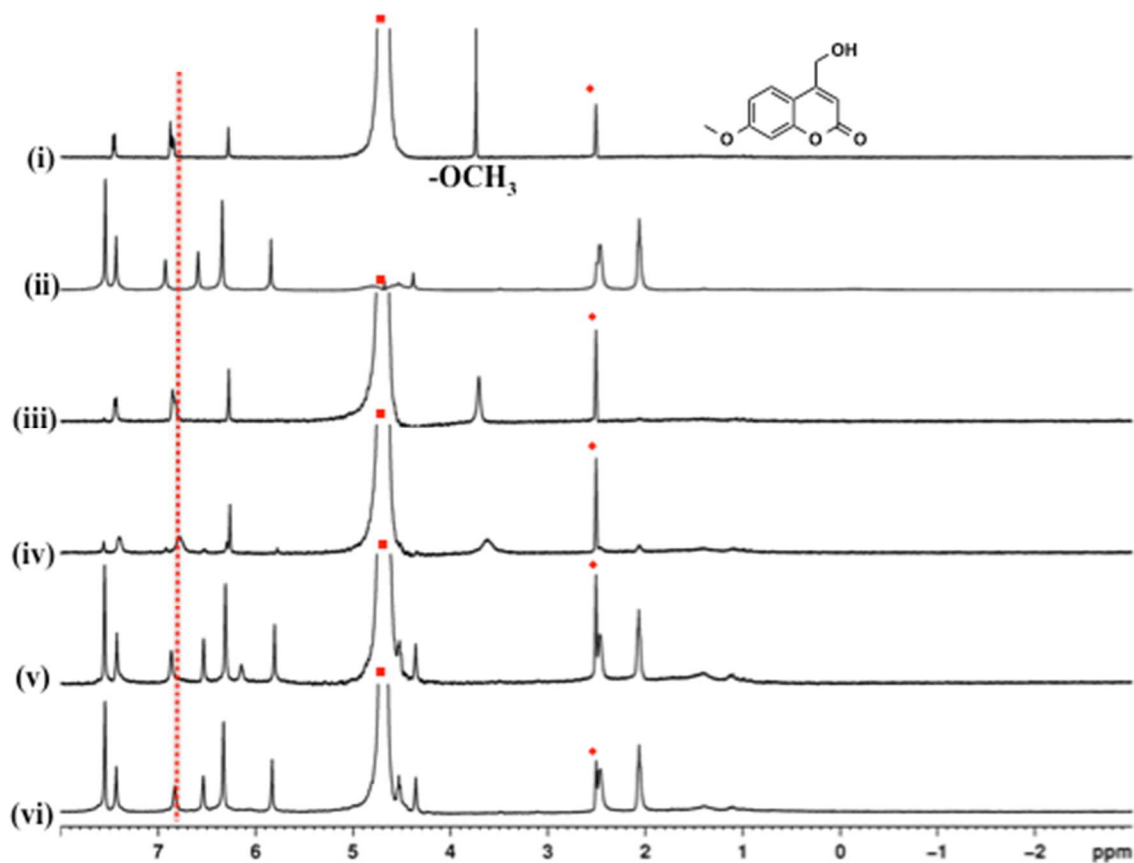

**Figure S59.**  $^1\text{H}$  NMR (500 MHz, 10 mM  $\text{Na}_2\text{B}_4\text{O}_7$  buffer/ $\text{D}_2\text{O}$ , pH = 8.7) spectra of (i) **8** ( $[\mathbf{8}] = 0.5$  mM, 0.5 mM); (ii) OA ( $[\text{OA}] = 1$  mM) (iii) OA@**8** ( $[\mathbf{8}] = 0.5$  mM,  $[\text{OA}] = 0.01$  mM); (iv) OA@**8** ( $[\mathbf{8}] = 0.5$  mM, OA = 0.03 mM); (v) OA@**8** ( $[\mathbf{8}] = 0.5$  mM,  $[\text{OA}] = 0.25$  mM); (vi) OA@**8** ( $[\mathbf{8}] = 0.5$  mM,  $[\text{OA}] = 0.5$  mM). ♦ and ■ indicate the residual solvent peaks of DMSO- $\text{d}_6$  and water, respectively.

## **4. Photolysis studies**

### **4.1 Sample preparation and procedures**

#### **(a) Sample preparation for photochemical studies (monitored by $^1\text{H}$ NMR)**

A 600  $\mu\text{L}$  of 1 mM OA (10 mM  $\text{Na}_2\text{B}_4\text{O}_7$  in  $\text{D}_2\text{O}$ , pH = 8.7) solution was placed in an NMR tube. Then 0.5 equivalents of guest (5  $\mu\text{L}$  of a 60 mM solution in  $\text{DMSO}-d_6$ ) were added. After shaking the NMR tube for 5 min, the  $^1\text{H}$  NMR was recorded to confirm the complex formation. The sample was then irradiated with UV light using a 450 W medium pressure mercury vapor lamp (Pyrex tubes,  $\lambda \geq 300$  nm) and the progress of the reaction was monitored by  $^1\text{H}$  NMR.

#### **(b) Sample preparation for photochemical studies (monitored by fluorescence)**

Stock solutions of each guest molecule were prepared in DMSO at 60 mM concentration. A 12 mL host (OA) solution at  $5 \times 10^{-5}$  M was also prepared using 10 mM  $\text{Na}_2\text{B}_4\text{O}_7$  buffer/ $\text{H}_2\text{O}$  (pH = 8.7). The solutions of the complexes were prepared by adding 5  $\mu\text{L}$  of a 60 mM guest solution in  $\text{DMSO}-d_6$  (to make final guest concentration  $2.5 \times 10^{-5}$  M) to as prepared host solution ( $5 \times 10^{-5}$  M). After shaking the mixture (complex) manually for 2 min, the solution was placed in a quartz cuvette and irradiated with UV light using a 450 W medium pressure mercury vapor lamp ( $\lambda \geq 300$  nm) and the progress of the reaction was monitored by fluorescence.

#### **(c) Sample preparation for photochemical studies of products, monitored by liquid chromatography (LC) coupled to a diode array detector (DAD) and to a mass spectrometer (MS), LC-DAD-MS.**

Irradiations of guests@OA<sub>2</sub> complexes were carried out using aqueous solutions of  $\text{Na}_2\text{B}_4\text{O}_7$  (10 mM, pH = 8.7) containing 200  $\mu\text{M}$  of the guest and 400  $\mu\text{M}$  of the host and not degassed. These irradiations were performed using a high-pressure xenon lamp in conjunction with a water filter to prevent heating of the sample solution. An additional Pyrex filter was inserted to remove UV light below 300 nm. Irradiated samples for photoproduct analysis by ESI-MS/MS were prepared in 0.5 % aqueous ammonia.

#### **(d) Identification and quantification studies of irradiated samples by Fluorescence, LC-DAD-MS, ESI-MS/MS and $^1\text{H}$ NMR)**

Photoproducts of guests@OA<sub>2</sub> complexes were followed by LC-DAD with UV analysis at 280, 320, 330, 350 nm and by LC-MS under positive polarity or negative polarity. The identifications of 7-methoxy-4-(hydroxymethyl)-2*H*-chromen-2-one (**8**) and 7-methoxy-

4-methyl-2H-chromen-2-one (**9**) were made by injecting authentic standards. OA-coupling and decarboxylated ester photoproducts were assigned by a combination of UV (taken with the DAD), ESI-MS and ESI-MS/MS spectra and comparison with spectra of known compounds when available. The ESI-MS/MS spectra were obtained by direct injection (infusion).

Quantitative photoproduct analyses of 7-methoxy-4-(hydroxymethyl)-2H-chromen-2-one (**8**) and 7-methoxy-4-methyl-2H-chromen-2-one (**9**) were performed using calibrations curves prepared from DAD traces obtained at 320 nm. Quantitative estimations of OA-adduct products and decarboxylated trigger compounds were made by assuming the extinction coefficients at 350 nm were similar to the coumarin cage phototrigger and 7-methoxy-4-methyl-2H-chromen-2-one (**9**), respectively. Because OA-phototrigger coupling products have similar retention times or overlap with the OA signal, the concentrations of these products were estimated from traces at 350 nm, where OA does not absorb. 1-Adamantanecarboxylic acid, octanoic acid and decanoic acid were quantified by LC-MS, in the negative polarity mode by following the individual ions at  $m/z$ 's 179, 143 and 171, respectively. The non-irradiated and irradiated solutions were directly injected into the LC-DAD-MS system without further processing. Acetic acid, 3,3-dimethylacrylic acid, butanoic acid and hexanoic acid were quantified by  $^1\text{H}$  NMR. Here, the integral values were obtained before and after irradiation by taking one of the peaks of host molecule as a reference peak.

#### **(e) ESI-MS and LC-MS analysis conditions**

The ESI-MS spectra were obtained in the conditions reported in section 2.3. The LC-DAD-MS analysis was performed using an Agilent Technologies 1200 Series LC, equipped with a diode array detector and coupled to a Bruker Daltonics HCT *ultra*. A Hamilton PRP-1 reversed phase LC column (15.0 cm length, 2.1 mm internal diameter, 5  $\mu\text{m}$ ), stabilized at 25  $^{\circ}\text{C}$  was used. The mobile phase was comprise of acetonitrile (A) and water (B), both with 0.1 % of formic acid, and ethyl acetate (C). The gradient started with 52 % of A, 38 % of B and 10 % of C. The mobile phase composition was changed to 2 % of A, 73 % of B and 25 % of C in 5 minutes and kept at this composition for an additional 7 minutes. Finally, the system was allowed to return to the initial composition of the mobile phase (52 % of A, 38 % of B and 10 % of C) in 1 min and then stabilized for additional 5 minutes before the next run.



## 4.2 Fluorescence spectra of irradiated samples

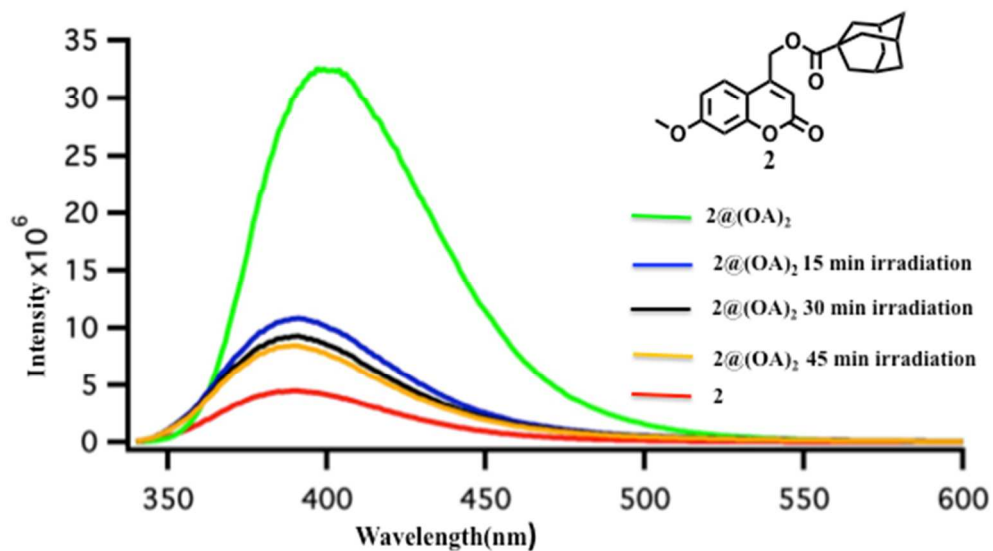

**Figure S60.** Emission spectra ( $\lambda_{\text{exc}} = 330$  nm) of  $2@(\text{OA})_2$  as function of the irradiation time ( $[\mathbf{2}] = 50$   $\mu\text{M}$ ,  $[\text{OA}] = 100$   $\mu\text{M}$  in  $\text{Na}_2\text{B}_4\text{O}_7$  buffer/ $\text{H}_2\text{O}$ ).

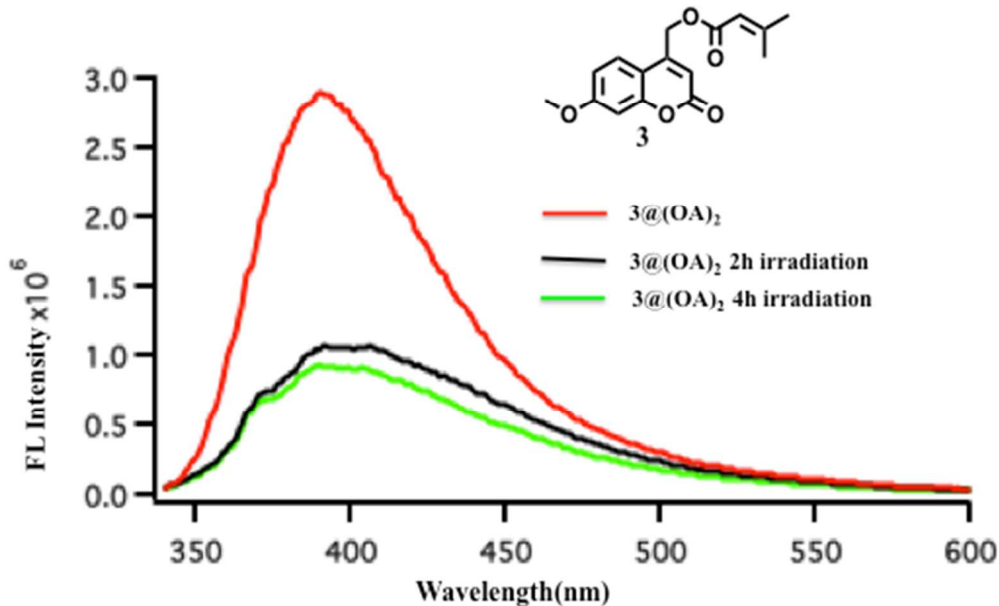

**Figure S61.** Emission spectra ( $\lambda_{\text{exc}} = 330$  nm) of  $3@(\text{OA})_2$  as function of the irradiation time ( $[\mathbf{3}] = 50$   $\mu\text{M}$ ,  $[\text{OA}] = 100$   $\mu\text{M}$  in  $\text{Na}_2\text{B}_4\text{O}_7$  buffer/ $\text{H}_2\text{O}$ ).

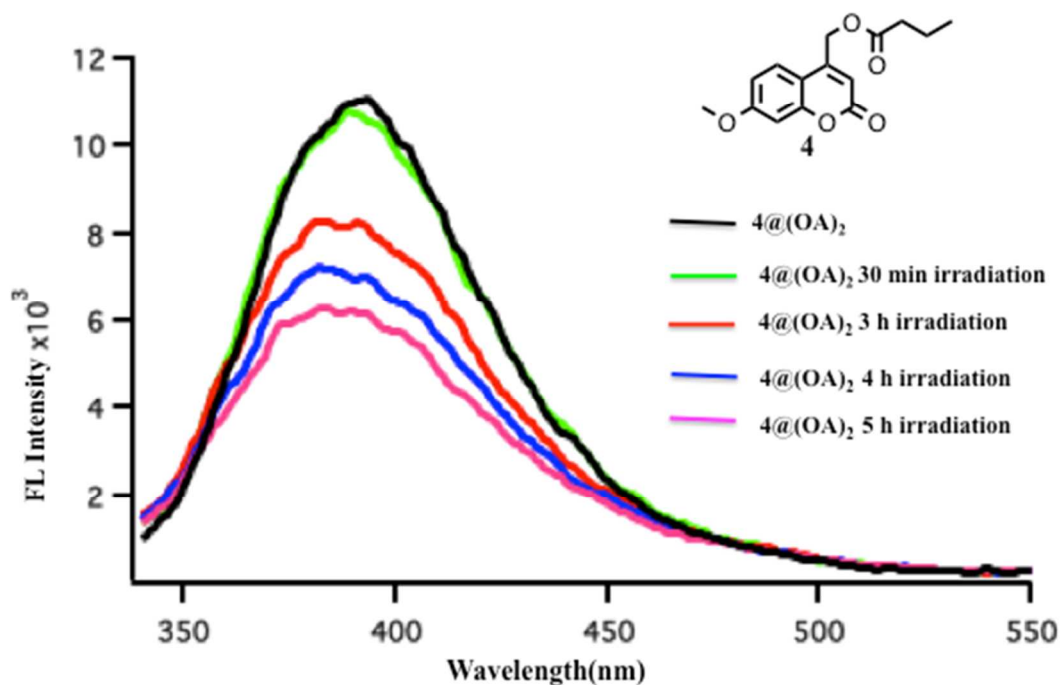

**Figure S62.** Emission spectra ( $\lambda_{\text{exc}} = 330 \text{ nm}$ ) of  $4@(\text{OA})_2$  as function of irradiation time ([**4**] =  $50 \mu\text{M}$ , [ $\text{OA}$ ] =  $100 \mu\text{M}$  in  $\text{Na}_2\text{B}_4\text{O}_7$  buffer/ $\text{H}_2\text{O}$ ).

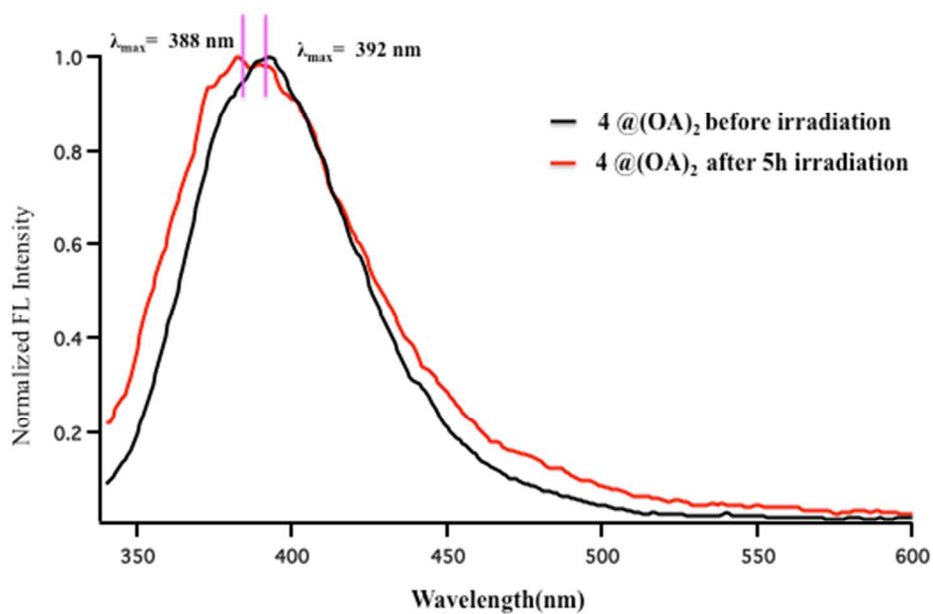

**Figure S63.** Normalized emission spectra ( $\lambda_{\text{exc}} = 330 \text{ nm}$ ) of  $4@(\text{OA})_2$  before irradiation (black) and after 5h irradiation (red) ([**4**] =  $50 \mu\text{M}$ , [ $\text{OA}$ ] =  $100 \mu\text{M}$  in  $\text{Na}_2\text{B}_4\text{O}_7$  buffer/ $\text{H}_2\text{O}$ ).

### 4.3 $^1\text{H}$ NMR spectra of irradiated samples

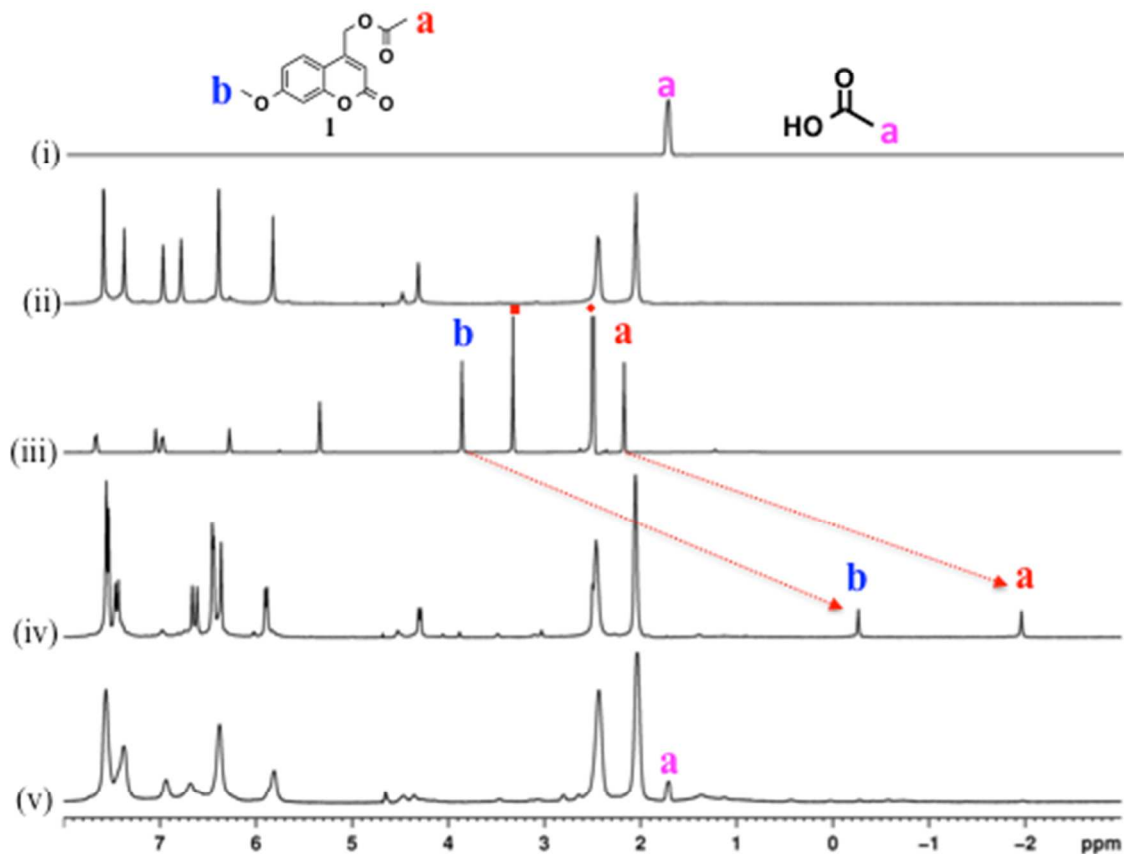

**Figure S64.**  $^1\text{H}$ -NMR (500 MHz) spectra of (i) Acetic acid ([Acetic acid] = 0.5 mM) in 10 mM  $\text{Na}_2\text{B}_4\text{O}_7$  buffer/ $\text{D}_2\text{O}$ , pH = 8.7; (ii) OA ([OA] = 1 mM) in 10 mM  $\text{Na}_2\text{B}_4\text{O}_7$  buffer/ $\text{D}_2\text{O}$ , pH = 8.7; (iii) **1** in DMSO- $\text{d}_6$ ; (iv) **1**@(OA) $_2$  ([OA] = 1 mM and [**1**] = 0.5 mM) in 10 mM  $\text{Na}_2\text{B}_4\text{O}_7$  buffer/ $\text{D}_2\text{O}$ , pH = 8.7; (v) 70 min irradiation of ((iv)) ( $\lambda \geq 300$  nm).  $\blacklozenge$  and  $\blacksquare$  indicate the residual solvent peaks of DMSO- $\text{d}_6$  and water, respectively.

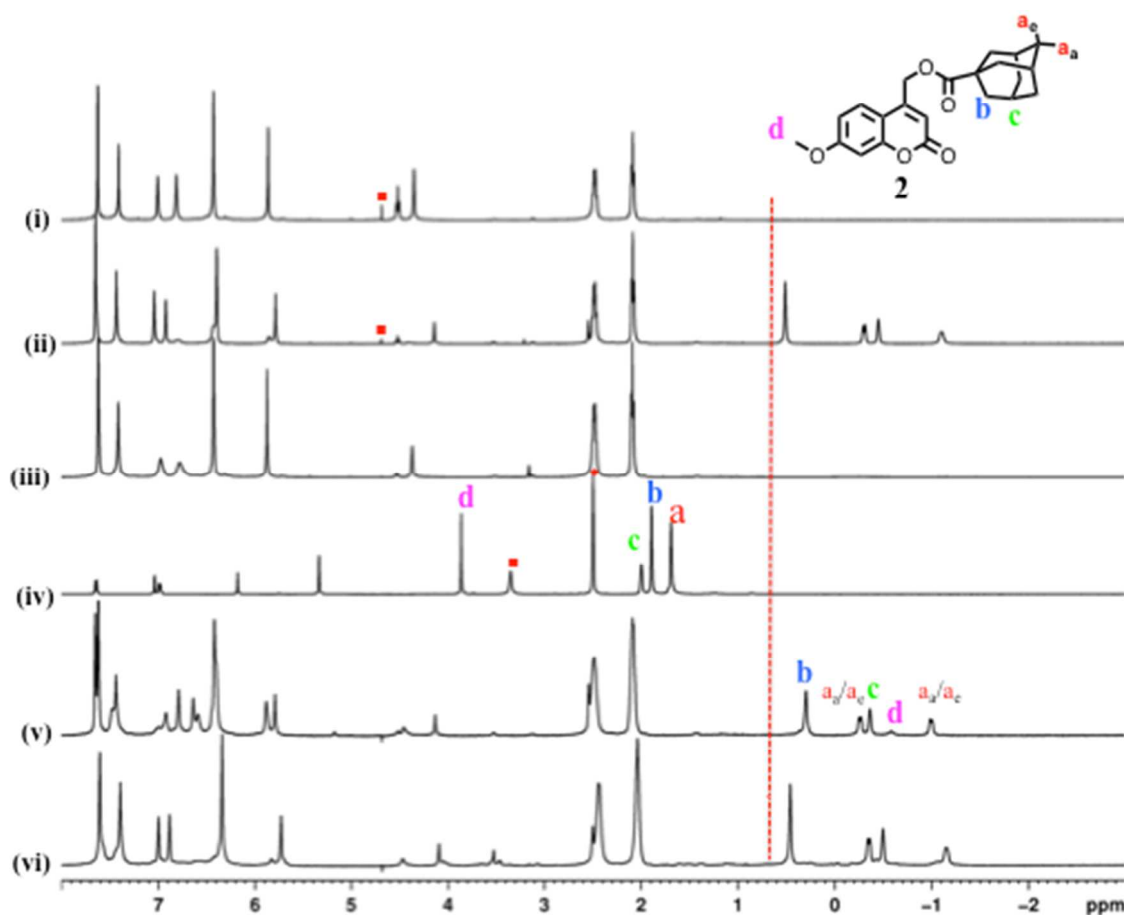

**Figure S65.**  $^1\text{H}$ -NMR (500 MHz,) spectra of (i) OA ( $[\text{OA}]=1\text{mM}$ ); (ii) 1-Adamantanecarboxylic acid@OA ( $[\text{OA}]=1\text{mM}$ ,  $[1\text{-Adamantane carboxylic acid}]=0.5\text{ mM}$ ) in 10 mM  $\text{Na}_2\text{B}_4\text{O}_7$  buffer/ $\text{D}_2\text{O}$ , pH = 8.7; (iii) **8**@OA (OA=1 mM, [**8**] = 0.5 mM) in 10 mM  $\text{Na}_2\text{B}_4\text{O}_7$  buffer/ $\text{D}_2\text{O}$ , pH = 8.7; (iv) **2** in  $\text{DMSO-d}_6$ ; (v) **2**@(OA) $_2$  ( $[\text{OA}] = 1\text{ mM}$  and [**2**] = 0.5 mM) in 10 mM  $\text{Na}_2\text{B}_4\text{O}_7$  buffer/ $\text{D}_2\text{O}$ , pH = 8.7; (vi) after 30 min irradiation of ((v)) ( $\lambda \geq 300\text{ nm}$ ). ♦ and ■ indicate the residual solvent peaks of  $\text{DMSO-d}_6$  and water, respectively.

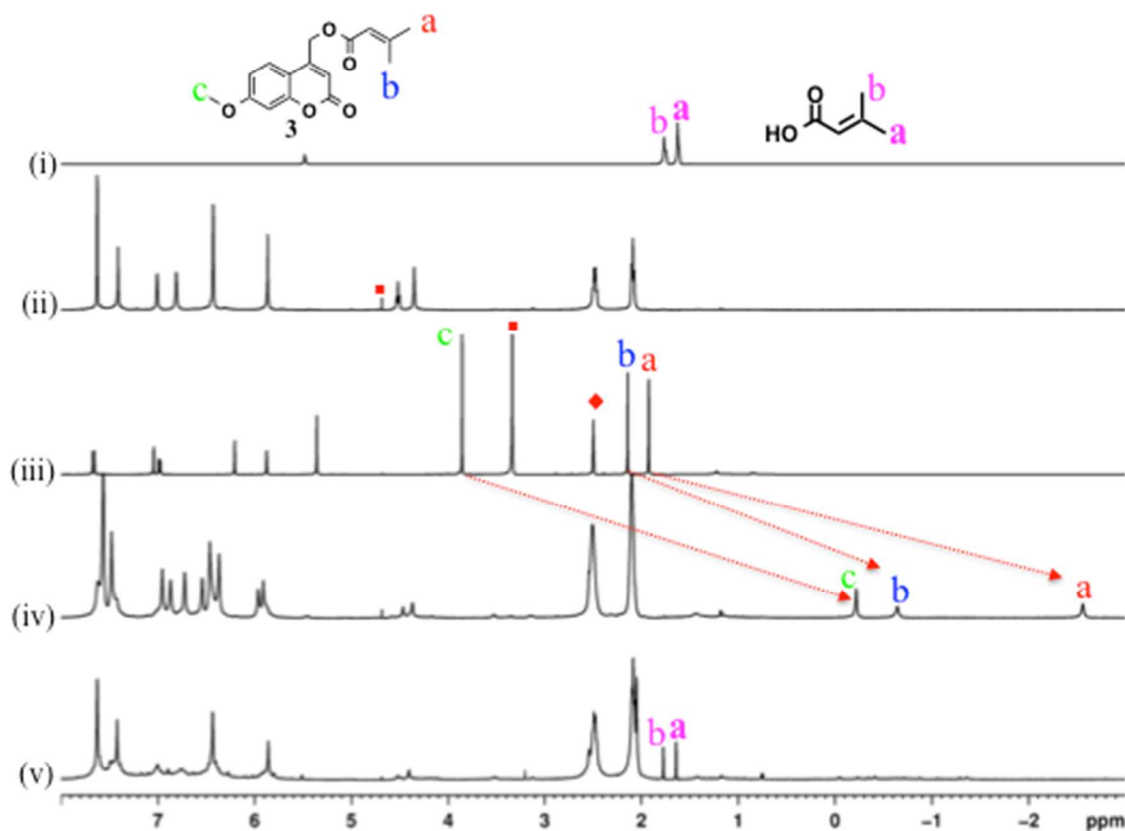

**Figure S66.** <sup>1</sup>H-NMR (500 MHz) spectra of (i) 3,3 dimethyl acrylic acid ([3,3 dimethyl acrylic acid] = 0.5 mM) in 10 mM Na<sub>2</sub>B<sub>4</sub>O<sub>7</sub> buffer/D<sub>2</sub>O, pH = 8.7; (ii) OA ([OA] = 1 mM); (iii) **3** in DMSO-d<sub>6</sub>; (iv) **3**@(OA)<sub>2</sub> ([OA] = 1 mM and [**3**] = 0.5 mM); (v) after 4h irradiation of ((iv)) (λ ≥ 300 nm). ♦ and ■ indicate the residual solvent peaks of DMSO-d<sub>6</sub> and water, respectively.

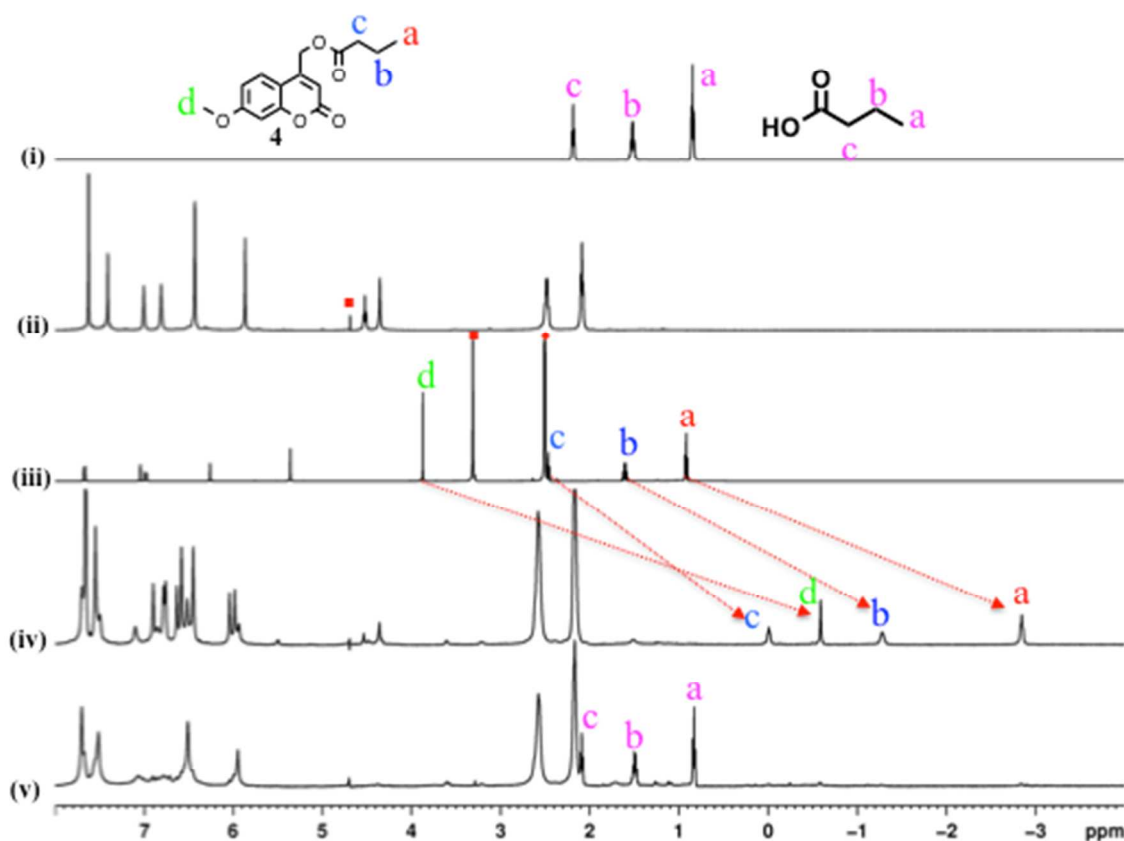

**Figure S67.** <sup>1</sup>H-NMR (500 MHz) spectra of (i) Butanoic acid ([Butanoic acid] = 0.5 mM) **in** 10 mM Na<sub>2</sub>B<sub>4</sub>O<sub>7</sub> buffer/D<sub>2</sub>O, pH = 8.7; (ii) OA ([OA] = 1 mM) **in** 10 mM Na<sub>2</sub>B<sub>4</sub>O<sub>7</sub> buffer/D<sub>2</sub>O, pH = 8.7; (iii) **4** in DMSO-d<sub>6</sub>; (iv) **4**@(OA)<sub>2</sub> ([OA] = 1 mM and [**4**] = 0.5 mM) **in** 10 mM Na<sub>2</sub>B<sub>4</sub>O<sub>7</sub> buffer/D<sub>2</sub>O, pH = 8.7; (v) after 5h irradiation of ((iv)) (λ ≥ 300 nm). ♦ and ■ indicate the residual solvent peaks of DMSO-d<sub>6</sub> and water, respectively.

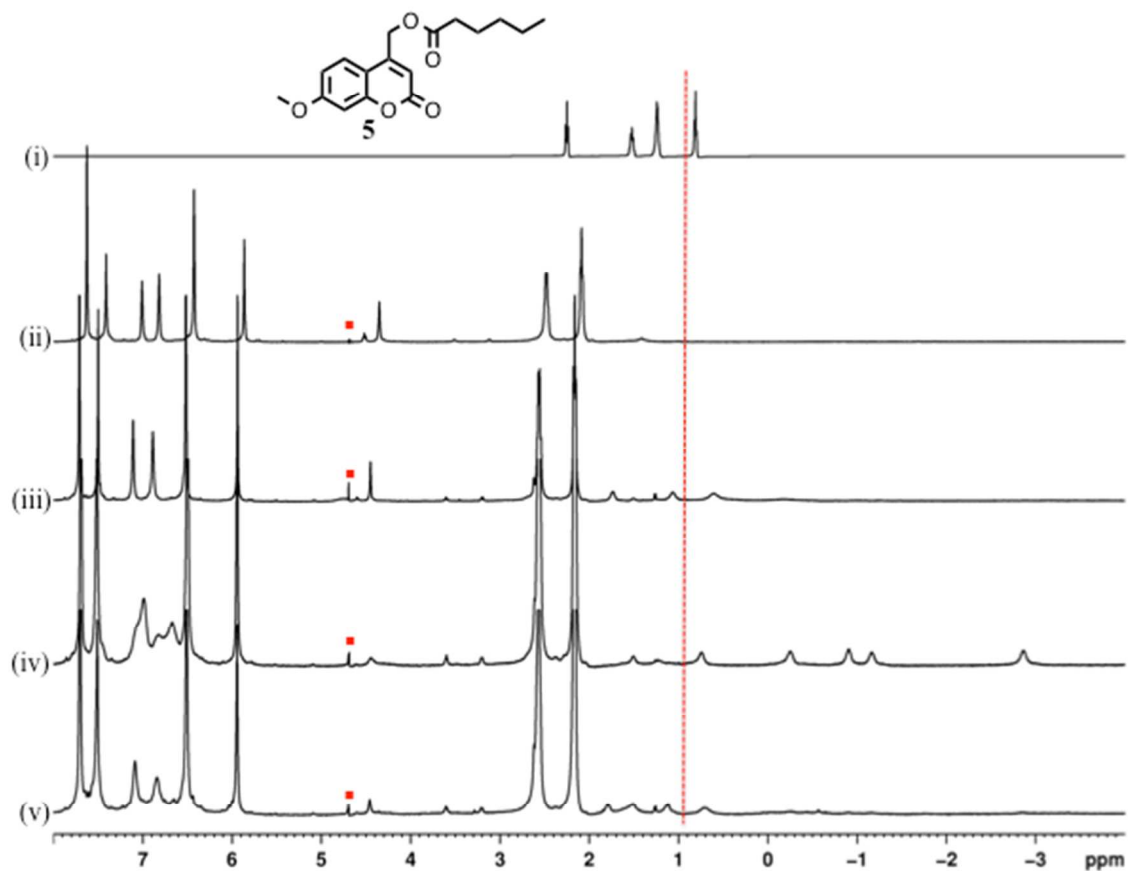

**Figure S68.**  $^1\text{H}$ -NMR (500 MHz, 10 mM  $\text{Na}_2\text{B}_4\text{O}_7$  buffer/ $\text{D}_2\text{O}$ , pH = 8.7) spectra of (i) Hexanoic acid (ii) OA ([OA] = 1 mM); (iii) Hexanoic acid (0.5 mM) + OA (1.0 mM); (iv) **5**@(OA)<sub>2</sub> ([OA] = 1 mM and [**5**] = 0.5 mM); (v) after 5h irradiation of ((iv)) ( $\lambda \geq 300$  nm). ■ indicates the residual solvent peak of water.

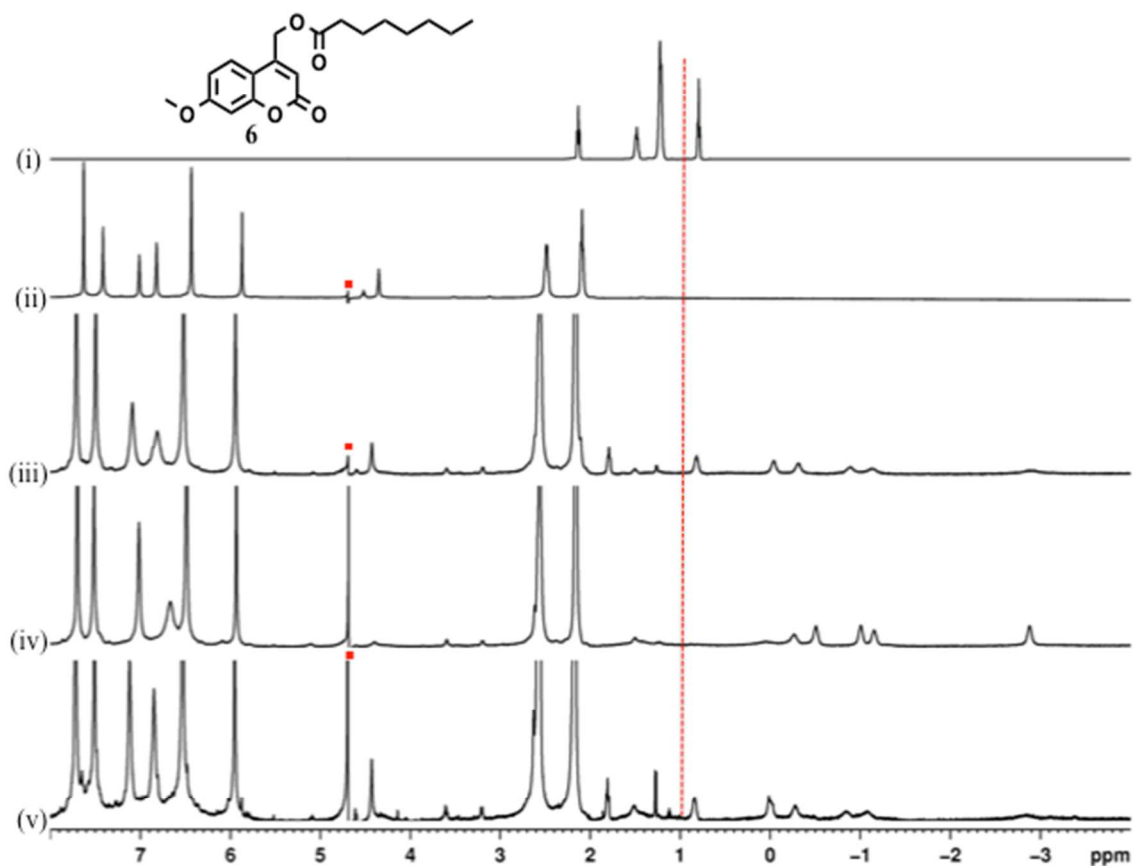

**Figure S69.**  $^1\text{H}$ -NMR (500 MHz, 10 mM  $\text{Na}_2\text{B}_4\text{O}_7$  buffer/ $\text{D}_2\text{O}$ , pH = 8.7) spectra of (i) Octanoic acid (ii) OA ( $[\text{OA}] = 1 \text{ mM}$ ); (iii) Octanoic acid (0.25 mM) + OA (1.0 mM); (iv) **6**@(OA)<sub>2</sub> ( $[\text{OA}] = 1 \text{ mM}$  and  $[\text{6}] = 0.5 \text{ mM}$ ); (v) after 5h irradiation of ((iv)) ( $\lambda \geq 300 \text{ nm}$ ). ■ indicates the residual solvent peak of water.



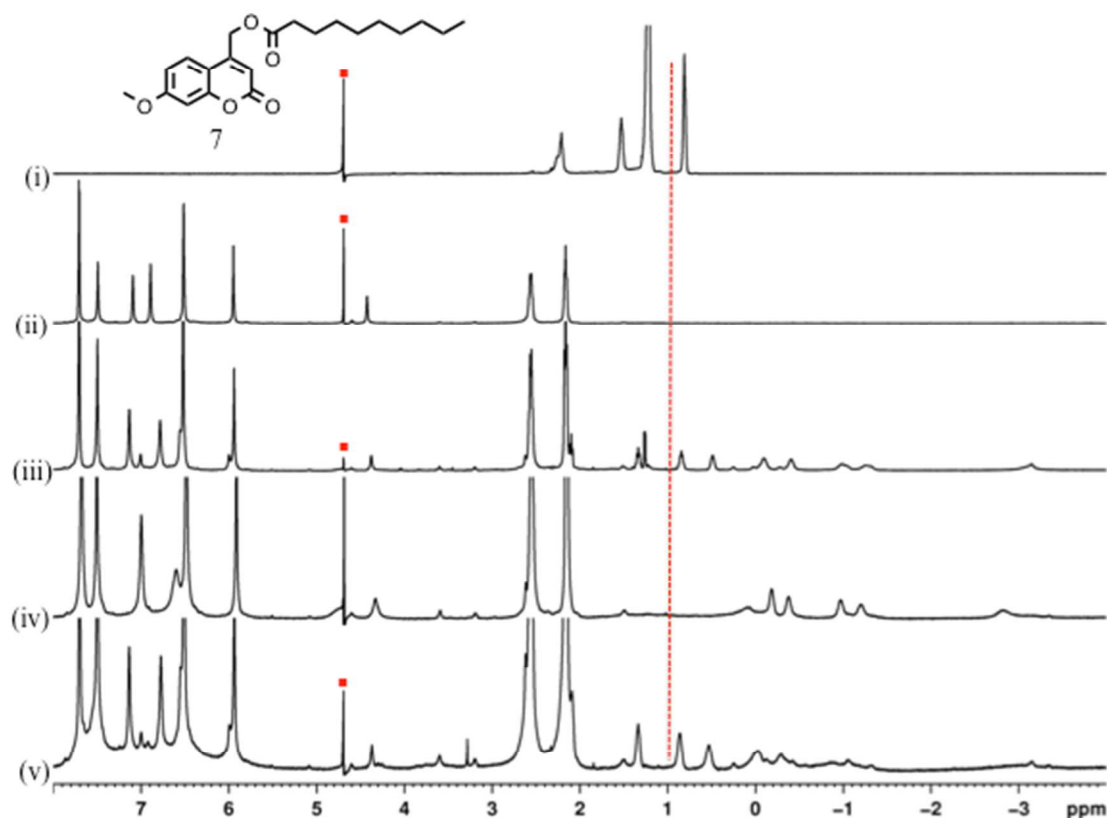

**Figure S70.** <sup>1</sup>H-NMR (500 MHz, 10 mM Na<sub>2</sub>B<sub>4</sub>O<sub>7</sub> buffer/D<sub>2</sub>O, pH = 8.7) spectra of (i) Decanoic acid (ii) OA ([OA] = 1 mM); (iii) Decanoic acid (0.25 mM) + OA (1.0 mM); (iv) **7**@(OA)<sub>2</sub> ([OA] = 1 mM and [**7**] = 0.5 mM); (v) after 6h irradiation of ((iv)) (λ ≥ 300 nm). ■ indicates the residual solvent peak of water.

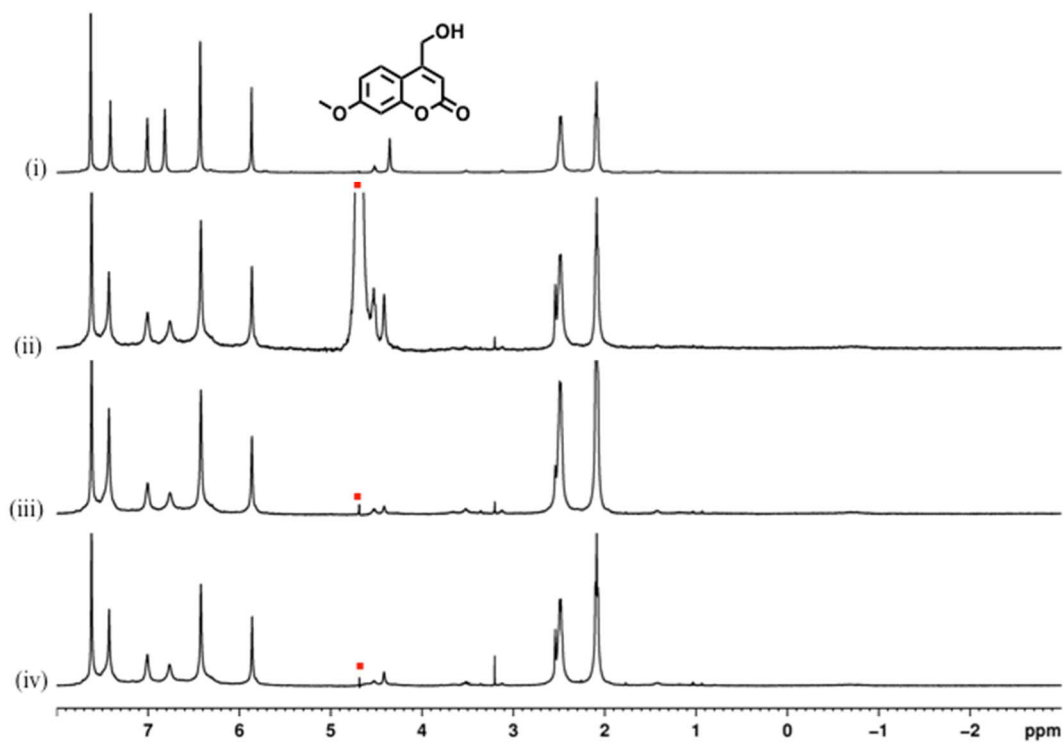

**Figure S71.**  $^1\text{H}$ -NMR (500 MHz, 10 mM  $\text{Na}_2\text{B}_4\text{O}_7$  buffer/ $\text{D}_2\text{O}$ , pH = 8.7) spectra of (i) OA ( $[\text{OA}] = 1 \text{ mM}$ ); (ii)  $\mathbf{8}@\text{/(OA)}_2$  ( $[\text{OA}] = 1 \text{ mM}$  and  $[\mathbf{8}] = 0.5 \text{ mM}$ ); (iii) 2h irradiation of ((ii)) ( $\lambda \geq 300 \text{ nm}$ ); (iv) 4h irradiation of ((ii)) ( $\lambda \geq 300 \text{ nm}$ ).

#### 4.4 ESI-MS and LC-MS of irradiated samples

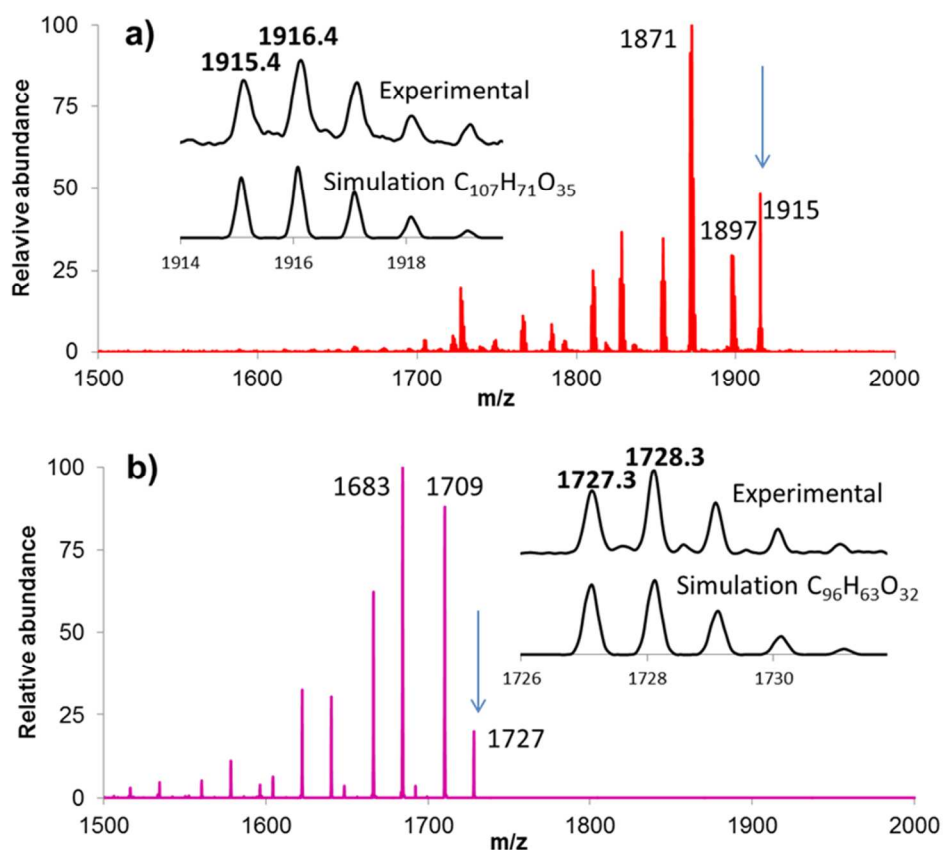

**Figure S72.** Fragmentation spectra of OA adduct with m/z 1915 ([M-H]<sup>-</sup>), **a**), and OA (m/z 1727, ([M-H]<sup>-</sup>), **b**). The arrows indicate the fragmented ions. The inserts shows the experimental and simulated isotope patterns of fragmented peaks. C<sub>96</sub>H<sub>63</sub>O<sub>32</sub> is the deprotonated OA ion. C<sub>107</sub>H<sub>71</sub>O<sub>35</sub> corresponds to a deprotonated coupling product that is formed by the radical mechanism.

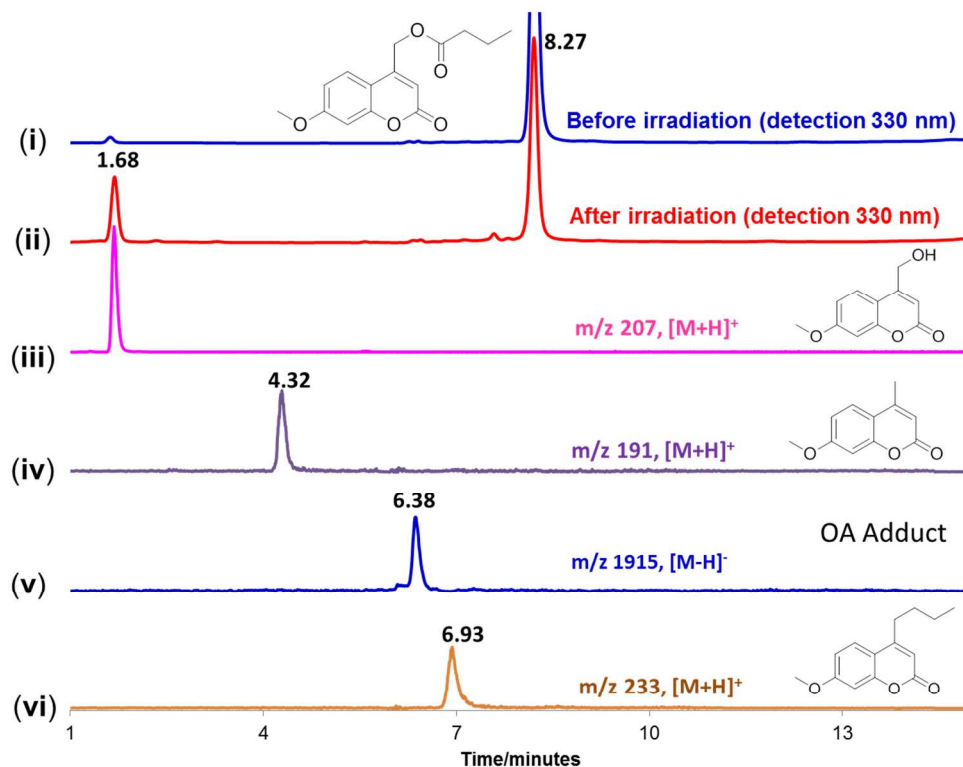

**Figure S73.** LC-DAD trace (330 nm) of 4@OA<sub>2</sub>, before irradiation, (i) and after irradiation (ii) followed by single ion mass chromatograms correspondent to main detected products. (iii) is the single ion trace at m/z 207, correspondent to the positive ion ([M+H]<sup>+</sup>) of 7-methoxy-4-(hydroxymethyl)-2H-chromen-2-one (**8**); (iv) the single ion trace at m/z 191, correspondent to the positive ion ([M+H]<sup>+</sup>) of 7-methoxy-4-methyl-2H-chromen-2-one (**9**); (v) the single ion trace at m/z 1915, correspondent to the negative ion ([M-H]<sup>-</sup>) of a OA-Coumarin coupling product; (vi) the single ion trace at m/z 233, correspondent to the positive ion ([M+H]<sup>+</sup>) of decarboxylated **4**.

## References

1. Gibb, C. L. D.; Gibb, B. C. *J. Am. Chem. Soc.* **2004**, 126, 11408.
2. Eckardt, T.; Hagen, V.; Schade, B.; Schmidt, R.; Schweitzer, C.; Bendig, J. *J. Org. Chem.* **2002**, 67, 703-710.
